# Supplementary material for: Examining Potential of Scents for Enhancement of User Performance with Mobile Apps
Source: Hindawi journal article supplement (doi:10.1155/2022/8776994), 2022-03-16
Supplement: f1 [file 8776994.f1.zip]

| User    | Task | Time (s) | KLM | Errors |
|---------|------|----------|-----|--------|
| eusr#1  | T1   | 0:49     | 14  | 2      |
| eusr#1  | T2   | 0:27     | 11  | 0      |
| eusr#1  | T3   | 0:40     | 11  | 3      |
| eusr#1  | T4   | 0:08     | 3   | 0      |
| eusr#1  | T5   | 0:20     | 5   | 0      |
| eusr#2  | T1   | 0:16     | 3   | 0      |
| eusr#2  | T2   | 0:24     | 5   | 0      |
| eusr#2  | T3   | 0:58     | 11  | 2      |
| eusr#2  | T4   | 2:24     | 26  | 0      |
| eusr#2  | T5   | 0:28     | 6   | 0      |
| eusr#3  | T1   | 0:30     | 4   | 0      |
| eusr#3  | T2   | 0:22     | 4   | 0      |
| eusr#3  | T3   | 0:21     | 7   | 2      |
| eusr#3  | T4   | 0:41     | 17  | 0      |
| eusr#3  | T5   | 0:15     | 5   | 0      |
| eusr#4  | T1   | 0:13     | 4   | 0      |
| eusr#4  | T2   | 0:15     | 4   | 0      |
| eusr#4  | T3   | 0:30     | 11  | 4      |
| eusr#4  | T4   | 0:39     | 16  | 1      |
| eusr#4  | T5   | 0:16     | 7   | 0      |
| eusr#5  | T1   | 0:23     | 3   | 0      |
| eusr#5  | T2   | 0:17     | 4   | 0      |
| eusr#5  | T3   | 1:31     | 17  | 7      |
| eusr#5  | T4   | 1:22     | 12  | 0      |
| eusr#5  | T5   | 0:46     | 5   | 0      |
| eusr#6  | T1   | 0:09     | 6   | 0      |
| eusr#6  | T2   | 0:12     | 6   | 0      |
| eusr#6  | T3   | 0:19     | 5   | 0      |
| eusr#6  | T4   | 0:08     | 3   | 0      |
| eusr#6  | T5   | 0:16     | 5   | 0      |
| eusr#7  | T1   | 0:18     | 4   | 0      |
| eusr#7  | T2   | 0:47     | 4   | 0      |
| eusr#7  | T3   | 1:03     | 11  | 4      |
| eusr#7  | T4   | 3:21     | 62  | 4      |
| eusr#7  | T5   | 0:15     | 4   | 0      |
| eusr#8  | T1   | 0:20     | 4   | 0      |
| eusr#8  | T2   | 0:32     | 5   | 0      |
| eusr#8  | T3   | 0:25     | 4   | 1      |
| eusr#8  | T4   | 0:15     | 3   | 0      |
| eusr#8  | T5   | 0:28     | 4   | 0      |
| eusr#9  | T1   | 0:06     | 4   | 0      |
| eusr#9  | T2   | 0:05     | 4   | 0      |
| eusr#9  | T3   | 0:10     | 4   | 1      |
| eusr#9  | T4   | 0:04     | 4   | 0      |
| eusr#9  | T5   | 0:05     | 4   | 0      |
| eusr#10 | T1   | 0:14     | 4   | 0      |
| eusr#10 | T2   | 0:10     | 5   | 0      |
| eusr#10 | T3   | 0:15     | 4   | 1      |
| eusr#10 | T4   | 0:08     | 3   | 0      |

|         |    |      |   |   |
|---------|----|------|---|---|
| eusr#10 | T5 | 0:08 | 4 | 0 |
|---------|----|------|---|---|
