# Supplementary material for: Examining Potential of Scents for Enhancement of User Performance with Mobile Apps
Source: Hindawi journal article supplement (doi:10.1155/2022/8776994), 2022-03-16
Supplement: f1 [file 8776994.f1.zip]

| User    | Task | Time (s) | KLM | Errors |
|---------|------|----------|-----|--------|
| eusr#1  | T1   | 0:35     | 8   | 0      |
| eusr#1  | T2   | 0:21     | 4   | 0      |
| eusr#1  | T3   | 1:40     | 33  | 0      |
| eusr#1  | T4   | 0:10     | 4   | 2      |
| eusr#1  | T5   | 0:18     | 7   | 0      |
| eusr#2  | T1   | 0:44     | 8   | 0      |
| eusr#2  | T2   | 0:18     | 5   | 0      |
| eusr#2  | T3   | 0:53     | 12  | 0      |
| eusr#2  | T4   | 0:20     | 6   | 0      |
| eusr#2  | T5   | 0:12     | 4   | 0      |
| eusr#3  | T1   | 1:02     | 13  | 0      |
| eusr#3  | T2   | 0:25     | 4   | 0      |
| eusr#3  | T3   | 5:13     | 94  | 8      |
| eusr#3  | T4   | 0:28     | 9   | 1      |
| eusr#3  | T5   | 0:16     | 6   | 0      |
| eusr#4  | T1   | 0:19     | 4   | 0      |
| eusr#4  | T2   | 0:08     | 4   | 0      |
| eusr#4  | T3   | 2:21     | 62  | 6      |
| eusr#4  | T4   | 0:15     | 6   | 0      |
| eusr#4  | T5   | 0:25     | 12  | 0      |
| eusr#5  | T1   | 0:30     | 5   | 0      |
| eusr#5  | T2   | 0:25     | 4   | 0      |
| eusr#5  | T3   | 2:42     | 21  | 3      |
| eusr#5  | T4   | 1:10     | 14  | 0      |
| eusr#5  | T5   | 0:40     | 4   | 0      |
| eusr#6  | T1   | 0:11     | 5   | 0      |
| eusr#6  | T2   | 0:14     | 4   | 0      |
| eusr#6  | T3   | 1:15     | 21  | 1      |
| eusr#6  | T4   | 0:24     | 9   | 0      |
| eusr#6  | T5   | 0:06     | 2   | 0      |
| eusr#7  | T1   | 0:42     | 9   | 0      |
| eusr#7  | T2   | 1:10     | 5   | 0      |
| eusr#7  | T3   | 2:38     | 33  | 1      |
| eusr#7  | T4   | 1:39     | 22  | 1      |
| eusr#7  | T5   | 0:15     | 4   | 0      |
| eusr#8  | T1   | 0:22     | 5   | 0      |
| eusr#8  | T2   | 0:19     | 4   | 0      |
| eusr#8  | T3   | 3:06     | 50  | 6      |
| eusr#8  | T4   | 0:14     | 4   | 1      |
| eusr#8  | T5   | 0:14     | 6   | 0      |
| eusr#9  | T1   | 0:15     | 7   | 0      |
| eusr#9  | T2   | 0:10     | 4   | 0      |
| eusr#9  | T3   | 2:45     | 48  | 5      |
| eusr#9  | T4   | 1:12     | 15  | 1      |
| eusr#9  | T5   | 0:12     | 4   | 0      |
| eusr#10 | T1   | 0:15     | 6   | 0      |
| eusr#10 | T2   | 0:15     | 6   | 0      |
| eusr#10 | T3   | 3:06     | 67  | 5      |
| eusr#10 | T4   | 1:27     | 43  | 2      |

eusr#10

T5

0:14

6

0
