# Supplementary material for: Examining Potential of Scents for Enhancement of User Performance with Mobile Apps
Source: Hindawi journal article supplement (doi:10.1155/2022/8776994), 2022-03-16
Supplement: f1 [file 8776994.f1.zip]

| users & apps<br>time (sec) | eUsr#1<br>App1 | eUsr#1<br>App2 | eUsr#1<br>App3 | eUsr#2<br>App1 | eUsr#2<br>App2 | eUsr#2<br>App3 |  |
|----------------------------|----------------|----------------|----------------|----------------|----------------|----------------|--|
| 1                          | 58             | 67             | 60             | 96             | 65             | 77             |  |
| 2                          | 58             | 66             | 60             | 96             | 65             | 78             |  |
| 3                          | 62             | 65             | 60             | 96             | 67             | 79             |  |
| 4                          | 64             | 65             | 60             | 95             | 69             | 80             |  |
| 5                          | 64             | 64             | 60             | 94             | 78             | 81             |  |
| 6                          | 64             | 63             | 60             | 94             | 78             | 83             |  |
| 7                          | 64             | 63             | 60             | 94             | 79             | 84             |  |
| 8                          | 63             | 63             | 60             | 93             | 79             | 82             |  |
| 9                          | 62             | 64             | 60             | 93             | 79             | 81             |  |
| 10                         | 62             | 63             | 60             | 93             | 80             | 81             |  |
| 11                         | 62             | 63             | 60             | 92             | 79             | 82             |  |
| 12                         | 62             | 63             | 60             | 92             | 79             | 82             |  |
| 13                         | 61             | 63             | 60             | 92             | 79             | 84             |  |
| 14                         | 61             | 63             | 60             | 92             | 80             | 85             |  |
| 15                         | 60             | 64             | 60             | 92             | 82             | 87             |  |
| 16                         | 59             | 65             | 60             | 92             | 82             | 87             |  |
| 17                         | 58             | 66             | 60             | 91             | 82             | 87             |  |
| 18                         | 58             | 66             | 60             | 91             | 82             | 87             |  |
| 19                         | 58             | 68             | 60             | 91             | 82             | 87             |  |
| 20                         | 59             | 69             | 60             | 91             | 81             | 87             |  |
| 21                         | 61             | 69             | 60             | 92             | 80             | 87             |  |
| 22                         | 62             | 69             | 61             | 93             | 79             | 88             |  |
| 23                         | 63             | 69             | 61             | 94             | 78             | 87             |  |
| 24                         | 64             | 69             | 61             | 95             | 80             | 87             |  |
| 25                         | 64             | 69             | 61             | 96             | 82             | 88             |  |
| 26                         | 65             | 71             | 61             | 96             | 83             | 93             |  |
| 27                         | 66             | 73             | 60             | 94             | 84             | 94             |  |
| 28                         | 66             | 74             | 60             | 93             | 81             | 95             |  |
| 29                         | 66             | 72             | 60             | 87             | 79             | 95             |  |
| 30                         | 67             | 67             | 60             | 83             | 79             | 95             |  |
| 31                         | 67             | 65             | 60             | 83             | 77             | 95             |  |
| 32                         | 67             | 64             | 60             | 83             | 76             | 93             |  |
| 33                         | 66             | 63             | 60             | 86             | 78             | 93             |  |
| 34                         | 66             | 62             | 60             | 87             | 79             | 92             |  |
| 35                         | 66             | 62             | 60             | 87             | 81             | 92             |  |
| 36                         | 66             | 62             | 62             | 84             | 82             | 91             |  |
| 37                         | 66             | 62             | 64             | 82             | 82             | 91             |  |
| 38                         | 65             | 62             | 65             | 82             | 82             | 92             |  |
| 39                         | 65             | 62             | 66             | 83             | 83             | 92             |  |
| 40                         | 64             | 62             | 66             | 85             | 82             | 92             |  |
| 41                         | 63             | 62             | 65             | 86             | 80             | 91             |  |
| 42                         | 61             | 62             | 65             | 84             | 80             | 90             |  |
| 43                         | 60             | 62             | 63             | 83             | 78             | 87             |  |
| 44                         | 60             | 64             | 63             | 82             | 78             | 87             |  |
| 45                         | 60             | 65             | 62             | 82             | 79             | 87             |  |
| 46                         | 60             | 66             | 62             | 82             | 80             | 87             |  |
| 47                         | 59             | 66             | 62             | 82             | 79             | 87             |  |
| 48                         | 59             | 67             | 62             | 81             | 78             | 87             |  |

|    |    |    |    |    |    |    |
|----|----|----|----|----|----|----|
| 49 | 60 | 67 | 62 | 81 | 77 | 87 |
| 50 | 60 | 67 | 63 | 86 | 78 | 87 |
| 51 | 61 | 66 | 63 | 89 | 79 | 88 |
| 52 | 62 | 65 | 63 | 89 | 80 | 88 |
| 53 | 62 | 64 | 63 | 89 | 80 | 88 |
| 54 | 63 | 63 | 63 | 88 | 76 | 88 |
| 55 | 66 | 62 | 63 | 88 | 76 | 88 |
| 56 | 67 | 62 | 62 | 89 | 75 | 88 |
| 57 | 67 | 62 | 62 | 90 | 74 | 89 |
| 58 | 67 | 62 | 62 | 91 | 74 | 88 |
| 59 | 67 | 62 | 62 | 92 | 74 | 88 |
| 60 | 67 | 62 | 62 | 92 | 74 | 87 |
| 61 | 67 | 62 | 62 | 91 | 75 | 86 |
| 62 | 67 | 62 | 62 | 89 | 80 | 83 |
| 63 | 65 | 62 | 62 | 87 | 81 | 81 |
| 64 | 65 | 60 | 64 | 85 | 82 | 81 |
| 65 | 65 | 60 | 65 | 85 | 82 | 81 |
| 66 | 65 | 59 | 65 | 85 | 84 | 82 |
| 67 | 65 | 59 | 65 | 87 | 87 | 83 |
| 68 | 66 | 59 | 66 | 87 | 89 | 86 |
| 69 | 67 | 59 | 66 | 89 | 89 | 86 |
| 70 | 67 | 59 | 66 | 89 | 88 | 86 |
| 71 | 67 | 59 | 66 | 88 | 86 | 85 |
| 72 | 67 | 59 | 64 | 85 | 83 | 85 |
| 73 | 66 | 58 | 63 | 83 | 83 | 86 |
| 74 | 64 | 57 | 63 | 80 | 83 | 87 |
| 75 | 64 | 57 | 62 | 80 | 84 | 88 |
| 76 | 64 | 57 | 62 | 80 | 86 | 90 |
| 77 | 65 | 57 | 62 | 82 | 89 | 91 |
| 78 | 65 | 57 | 61 | 83 | 90 | 90 |
| 79 | 66 | 57 | 64 | 81 | 89 | 88 |
| 80 | 68 | 57 | 66 | 81 | 88 | 84 |
| 81 | 70 | 59 | 66 | 80 | 87 | 83 |
| 82 | 72 | 59 | 66 | 79 | 85 | 83 |
| 83 | 72 | 59 | 66 | 79 | 85 | 83 |
| 84 | 72 | 59 | 66 | 79 | 84 | 83 |
| 85 | 72 | 60 | 63 | 80 | 83 | 83 |
| 86 | 71 | 59 | 62 | 82 | 83 | 83 |
| 87 | 70 | 59 | 62 | 84 | 82 | 83 |
| 88 | 72 | 59 | 62 | 85 | 81 | 83 |
| 89 | 72 | 59 | 62 | 86 | 81 | 83 |
| 90 | 71 | 59 | 62 | 86 | 84 | 84 |
| 91 | 71 | 59 | 63 | 87 | 84 | 84 |
| 92 | 71 | 59 | 63 | 88 | 82 | 84 |
| 93 | 68 | 58 | 63 | 91 | 80 | 83 |
| 94 | 68 | 60 | 63 | 92 | 80 | 82 |
| 95 | 67 | 61 | 63 | 92 | 82 | 81 |
| 96 | 66 | 61 | 63 | 92 | 84 | 81 |
| 97 | 66 | 62 | 63 | 91 | 86 | 80 |
| 98 | 66 | 62 | 64 | 91 | 87 | 79 |

|     |    |    |    |    |    |    |
|-----|----|----|----|----|----|----|
| 99  | 65 | 62 | 64 | 90 | 87 | 79 |
| 100 | 66 | 61 | 64 | 90 | 86 | 79 |
| 101 | 66 | 61 | 66 | 90 | 86 | 80 |
| 102 | 65 | 62 | 66 | 87 | 86 | 81 |
| 103 | 66 | 64 | 67 | 87 | 86 | 81 |
| 104 | 66 | 65 | 68 | 87 | 86 | 82 |
| 105 | 66 | 65 | 68 | 88 | 86 | 84 |
| 106 | 66 | 66 | 69 | 89 | 86 | 87 |
| 107 | 66 | 66 | 69 | 89 | 88 | 88 |
| 108 | 67 | 67 | 69 | 90 | 89 | 89 |
| 109 | 67 | 67 | 69 | 90 | 91 | 89 |
| 110 | 67 | 67 | 69 | 90 | 91 | 90 |
| 111 | 67 | 67 | 69 | 91 | 91 | 90 |
| 112 | 67 | 67 | 69 | 90 | 91 | 90 |
| 113 | 67 | 64 | 69 | 90 | 91 | 87 |
| 114 | 66 | 62 | 69 | 90 | 91 | 87 |
| 115 | 67 | 61 | 65 | 89 | 90 | 86 |
| 116 | 67 | 61 | 65 | 89 | 90 | 86 |
| 117 | 68 | 60 | 66 | 91 | 89 | 85 |
| 118 | 69 | 60 | 66 | 91 | 90 | 86 |
| 119 | 69 | 60 | 67 | 90 | 90 | 87 |
| 120 | 69 | 61 | 67 | 88 | 91 | 89 |
| 121 | 69 | 61 | 67 | 86 | 91 | 89 |
| 122 | 69 | 61 | 67 | 85 | 93 | 89 |
| 123 | 69 | 62 | 67 | 86 | 92 | 88 |
| 124 | 70 | 62 | 67 | 88 | 91 | 88 |
| 125 | 70 | 64 | 66 | 90 | 91 | 87 |
| 126 | 72 | 65 | 64 | 90 | 92 | 85 |
| 127 | 72 | 65 | 63 | 89 | 92 | 86 |
| 128 | 72 | 65 | 63 | 87 | 92 | 87 |
| 129 | 72 | 64 | 62 | 84 | 91 | 88 |
| 130 | 73 | 64 | 61 | 81 | 90 | 89 |
| 131 | 73 | 63 | 60 | 80 | 88 | 88 |
| 132 | 73 | 62 | 60 | 81 | 86 | 88 |
| 133 | 72 | 62 | 58 | 82 | 85 | 88 |
| 134 | 70 | 62 | 56 | 82 | 84 | 86 |
| 135 | 70 | 62 | 55 | 83 | 84 | 85 |
| 136 | 69 | 62 | 54 | 82 | 85 | 85 |
| 137 | 69 | 62 | 54 | 82 | 86 | 85 |
| 138 | 69 | 64 | 55 | 82 | 85 | 84 |
| 139 | 69 | 63 | 56 | 82 | 84 | 84 |
| 140 | 69 | 63 | 56 | 80 | 84 | 84 |
| 141 | 70 | 62 | 58 | 79 | 84 | 85 |
| 142 | 70 | 62 | 58 | 81 | 84 | 83 |
| 143 | 71 | 62 | 58 | 82 | 85 | 80 |
| 144 | 72 | 62 | 58 | 82 | 86 | 79 |
| 145 | 72 | 62 | 59 | 82 | 87 | 78 |
| 146 | 72 | 62 | 59 | 82 | 88 | 78 |
| 147 | 69 | 62 | 59 | 82 | 88 | 78 |
| 148 | 69 | 61 | 59 | 83 | 88 | 79 |

|     |    |    |    |    |    |    |
|-----|----|----|----|----|----|----|
| 149 | 69 | 60 | 59 | 84 | 87 | 80 |
| 150 | 68 | 61 | 59 | 84 | 88 | 81 |
| 151 | 66 | 60 | 58 | 84 | 87 | 82 |
| 152 | 66 | 60 | 57 | 83 | 86 | 81 |
| 153 | 65 | 60 | 57 | 83 | 85 | 81 |
| 154 | 64 | 60 | 59 | 81 | 85 | 81 |
| 155 | 63 | 60 | 60 | 81 | 85 | 81 |
| 156 | 62 | 60 | 60 | 82 | 86 | 80 |
| 157 | 61 | 60 | 59 | 82 | 85 | 75 |
| 158 | 60 | 59 | 58 | 82 | 85 | 71 |
| 159 | 59 | 59 | 57 | 82 | 85 | 69 |
| 160 | 58 | 59 | 56 | 82 | 83 | 68 |
| 161 | 58 | 59 | 56 | 82 | 82 | 68 |
| 162 | 58 | 59 | 56 | 82 | 82 | 70 |
| 163 | 58 | 59 | 56 | 82 | 81 | 74 |
| 164 | 58 | 60 | 56 | 83 | 82 | 77 |
| 165 | 58 | 59 | 58 | 83 | 83 | 77 |
| 166 | 59 | 60 | 63 | 83 | 84 | 78 |
| 167 | 59 | 60 | 65 | 86 | 84 | 78 |
| 168 | 59 | 61 | 67 | 89 | 84 | 78 |
| 169 | 59 | 61 | 67 | 91 | 83 | 78 |
| 170 | 60 | 62 | 68 | 92 | 82 | 79 |
| 171 | 61 | 62 | 68 | 93 | 82 | 80 |
| 172 | 62 | 62 | 67 | 93 | 82 | 80 |
| 173 | 62 | 61 | 66 | 93 | 83 | 80 |
| 174 | 62 | 61 | 65 | 92 | 84 | 81 |
| 175 | 62 | 62 | 63 | 91 | 85 | 81 |
| 176 | 62 | 66 | 62 | 91 | 85 | 79 |
| 177 | 62 | 68 | 62 | 91 | 84 | 78 |
| 178 | 60 | 68 | 61 | 92 | 84 | 79 |
| 179 | 58 | 66 | 61 | 94 | 84 | 80 |
| 180 | 58 | 66 |    | 95 | 84 | 82 |
| 181 | 58 | 66 |    | 96 | 83 | 84 |
| 182 | 59 | 65 |    | 96 | 80 | 85 |
| 183 | 59 | 64 |    | 96 | 81 | 84 |
| 184 | 60 | 64 |    | 96 | 83 | 85 |
| 185 | 61 | 64 |    | 95 | 85 | 86 |
| 186 | 61 | 62 |    | 94 | 85 | 86 |
| 187 | 61 | 62 |    | 93 | 83 | 88 |
| 188 | 61 | 62 |    | 89 | 81 | 90 |
| 189 | 61 | 62 |    | 89 | 81 | 91 |
| 190 | 62 | 62 |    | 89 | 81 | 92 |
| 191 | 62 | 62 |    | 88 | 81 | 92 |
| 192 | 61 | 61 |    | 87 | 83 | 89 |
| 193 | 60 | 59 |    | 87 | 85 | 87 |
| 194 | 59 | 57 |    | 87 | 85 | 86 |
| 195 | 59 | 57 |    | 86 | 85 | 84 |
| 196 | 59 | 57 |    | 85 | 85 | 83 |
| 197 | 59 | 57 |    | 85 | 73 | 84 |
| 198 | 59 | 58 |    | 84 | 73 | 84 |

|     |    |    |    |    |    |
|-----|----|----|----|----|----|
| 199 | 59 | 58 | 84 | 77 | 84 |
| 200 | 59 | 58 | 83 | 77 | 85 |
| 201 | 59 | 58 | 83 | 76 | 84 |
| 202 | 59 | 58 | 84 | 76 | 84 |
| 203 | 59 | 58 | 88 | 76 | 84 |
| 204 | 60 | 58 | 89 | 76 | 84 |
| 205 | 61 | 59 | 89 | 76 | 84 |
| 206 | 61 | 59 | 89 | 77 | 84 |
| 207 | 61 | 58 | 86 | 78 | 84 |
| 208 | 61 | 56 | 85 | 81 | 84 |
| 209 | 61 | 56 | 84 | 83 | 84 |
| 210 | 61 | 56 | 84 | 84 | 84 |
| 211 | 60 | 54 | 84 | 84 | 84 |
| 212 | 60 | 53 | 84 | 84 | 86 |
| 213 | 60 | 53 | 84 | 85 | 86 |
| 214 | 59 | 53 | 83 | 86 | 87 |
| 215 | 59 | 53 | 82 | 87 | 87 |
| 216 | 59 | 53 | 82 | 88 | 86 |
| 217 | 59 | 53 | 83 | 88 | 85 |
| 218 | 60 | 53 | 83 | 88 | 85 |
| 219 | 60 | 54 | 84 | 88 | 85 |
| 220 | 60 | 54 | 84 | 88 | 85 |
| 221 | 60 | 55 | 85 | 88 | 85 |
| 222 | 60 | 56 | 85 | 88 | 88 |
| 223 | 60 | 56 | 85 | 88 | 90 |
| 224 | 59 | 58 | 82 | 90 | 91 |
| 225 | 59 | 58 | 81 | 92 | 91 |
| 226 | 60 | 60 | 81 | 93 | 90 |
| 227 | 60 | 63 | 81 | 92 | 89 |
| 228 | 60 | 65 | 81 | 91 | 88 |
| 229 | 60 | 66 | 81 | 89 | 87 |
| 230 | 59 | 66 | 79 | 89 | 87 |
| 231 | 60 | 65 | 79 | 88 | 87 |
| 232 | 60 | 65 | 79 | 88 | 90 |
| 233 | 60 | 66 | 78 | 90 | 90 |
| 234 | 60 | 66 | 76 | 90 | 90 |
| 235 |    | 67 | 76 | 90 | 90 |
| 236 |    | 67 | 74 | 88 | 89 |
| 237 |    | 68 | 74 | 87 | 88 |
| 238 |    | 68 | 75 | 87 | 86 |
| 239 |    | 67 | 77 | 87 | 86 |
| 240 |    | 67 | 77 | 88 | 86 |
| 241 |    | 66 | 78 | 90 | 85 |
| 242 |    | 65 | 78 | 90 | 84 |
| 243 |    | 65 | 78 | 88 | 84 |
| 244 |    | 64 | 78 | 86 | 82 |
| 245 |    | 64 | 78 | 84 | 82 |
| 246 |    | 64 | 78 | 84 | 82 |
| 247 |    | 65 | 79 | 84 | 82 |
| 248 |    | 66 | 80 | 84 | 83 |

|     |    |    |    |    |
|-----|----|----|----|----|
| 249 | 66 | 80 | 84 | 84 |
| 250 | 65 | 79 | 83 | 85 |
| 251 | 65 | 77 | 83 | 86 |
| 252 | 65 | 76 | 83 | 88 |
| 253 | 65 | 76 | 83 | 88 |
| 254 | 65 | 76 | 84 | 88 |
| 255 | 66 | 76 | 86 | 85 |
| 256 | 67 | 77 | 87 | 84 |
| 257 | 68 | 77 | 88 | 84 |
| 258 | 70 | 79 | 88 | 85 |
| 259 | 72 | 81 | 89 | 86 |
| 260 | 71 | 82 | 89 | 86 |
| 261 | 71 | 84 | 89 | 87 |
| 262 | 71 | 85 | 88 | 88 |
| 263 | 71 | 86 | 88 | 87 |
| 264 | 71 | 86 | 88 | 85 |
| 265 | 70 | 86 | 87 | 84 |
| 266 | 66 | 86 | 83 | 82 |
| 267 | 64 | 87 | 80 | 80 |
| 268 | 63 | 87 | 78 | 81 |
| 269 | 63 | 88 | 78 | 82 |
| 270 | 63 | 88 | 84 | 83 |
| 271 | 63 | 87 | 87 | 83 |
| 272 | 63 | 87 | 89 | 84 |
| 273 | 63 | 87 | 89 | 85 |
| 274 | 64 | 87 | 90 | 86 |
| 275 | 64 | 86 | 91 | 87 |
| 276 | 64 | 85 | 93 | 87 |
| 277 | 65 | 85 | 94 | 86 |
| 278 | 65 | 84 | 95 | 87 |
| 279 | 66 | 83 | 95 | 87 |
| 280 | 66 | 84 | 95 | 86 |
| 281 | 67 | 84 | 95 | 86 |
| 282 | 67 | 84 | 93 | 86 |
| 283 | 68 | 85 | 92 | 86 |
| 284 | 67 | 85 | 90 | 85 |
| 285 | 67 | 85 | 85 | 84 |
| 286 | 68 | 86 | 81 | 84 |
| 287 | 68 | 86 | 79 | 83 |
| 288 | 68 | 87 | 76 | 81 |
| 289 | 68 | 87 | 74 | 82 |
| 290 | 68 | 88 | 74 | 83 |
| 291 | 68 | 89 | 75 | 84 |
| 292 | 68 | 89 | 75 | 85 |
| 293 | 69 | 89 | 74 | 87 |
| 294 | 69 | 89 | 74 | 87 |
| 295 | 69 | 89 | 75 | 88 |
| 296 | 70 | 89 | 75 | 88 |
| 297 | 70 | 90 | 75 | 89 |
| 298 | 71 | 90 | 77 | 89 |

|     |    |    |    |    |
|-----|----|----|----|----|
| 299 | 72 | 90 | 77 | 89 |
| 300 | 70 | 91 | 78 | 90 |
| 301 | 70 | 91 | 78 | 90 |
| 302 | 70 | 90 | 77 | 89 |
| 303 | 70 | 88 | 77 | 89 |
| 304 | 69 | 87 | 77 | 89 |
| 305 | 66 | 85 | 80 | 88 |
| 306 | 65 | 84 | 81 | 89 |
| 307 | 64 | 84 | 80 | 89 |
| 308 | 64 | 83 | 79 | 89 |
| 309 | 65 | 83 | 79 | 90 |
| 310 | 64 | 83 | 78 | 91 |
| 311 | 65 | 83 | 77 | 92 |
| 312 | 65 | 83 | 76 | 93 |
| 313 | 65 | 83 | 75 | 93 |
| 314 | 65 | 84 | 75 | 91 |
| 315 | 65 | 85 | 76 | 82 |
| 316 | 65 | 85 | 78 | 76 |
| 317 | 66 | 84 | 79 | 74 |
| 318 | 66 | 83 | 78 | 74 |
| 319 | 66 | 84 | 77 | 77 |
| 320 | 66 | 85 | 76 | 81 |
| 321 | 66 | 86 | 77 | 82 |
| 322 | 66 | 87 | 77 | 82 |
| 323 | 66 | 87 | 77 | 82 |
| 324 | 67 | 87 | 80 | 81 |
| 325 | 67 | 87 | 81 | 82 |
| 326 | 67 | 88 | 80 | 83 |
| 327 | 67 | 89 | 80 | 86 |
| 328 | 67 | 89 | 80 | 89 |
| 329 | 67 | 88 | 78 | 92 |
| 330 | 67 | 86 |    | 94 |
| 331 | 68 | 86 |    | 94 |
| 332 | 67 | 87 |    | 93 |
| 333 | 67 | 87 |    | 93 |
| 334 | 65 | 86 |    | 94 |
| 335 | 65 | 84 |    | 94 |
| 336 | 64 | 81 |    | 94 |
| 337 | 63 | 79 |    | 94 |
| 338 | 62 | 78 |    | 95 |
| 339 | 61 | 78 |    | 95 |
| 340 | 61 | 78 |    | 98 |
| 341 | 61 | 78 |    | 96 |
| 342 | 60 | 78 |    | 92 |
| 343 | 60 | 78 |    | 88 |
| 344 | 60 | 78 |    | 87 |
| 345 | 61 | 77 |    | 87 |
| 346 | 61 | 78 |    | 88 |
| 347 | 61 | 80 |    | 90 |
| 348 | 64 | 82 |    | 90 |

|     |    |    |    |
|-----|----|----|----|
| 349 | 66 | 82 | 90 |
| 350 | 66 | 82 | 88 |
| 351 | 65 | 82 | 87 |
| 352 | 64 | 82 | 87 |
| 353 | 63 | 83 | 87 |
| 354 | 62 | 84 | 88 |
| 355 | 62 | 86 | 88 |
| 356 | 61 | 87 | 88 |
| 357 | 61 | 88 | 88 |
| 358 | 61 | 87 | 88 |
| 359 | 62 | 86 | 88 |
| 360 | 62 | 85 | 88 |
| 361 | 64 | 85 | 88 |
| 362 | 65 | 84 | 89 |
| 363 | 65 | 83 | 89 |
| 364 | 65 | 83 | 94 |
| 365 | 66 | 82 | 95 |
| 366 | 66 | 82 | 96 |
| 367 | 66 | 82 |    |
| 368 | 64 | 82 |    |
| 369 | 64 | 82 |    |
| 370 | 62 | 82 |    |
| 371 | 62 | 86 |    |
| 372 | 61 | 88 |    |
| 373 | 61 | 89 |    |
| 374 | 61 | 90 |    |
| 375 | 61 | 91 |    |
| 376 | 61 | 92 |    |
| 377 | 61 | 91 |    |
| 378 | 62 | 89 |    |
| 379 | 61 | 88 |    |
| 380 | 61 | 88 |    |
| 381 | 61 | 88 |    |
| 382 | 61 | 88 |    |
| 383 | 61 | 88 |    |
| 384 | 60 | 88 |    |
| 385 | 60 | 88 |    |
| 386 | 60 | 89 |    |
| 387 | 60 | 91 |    |
| 388 | 60 | 91 |    |
| 389 | 60 | 90 |    |
| 390 | 60 | 90 |    |
| 391 | 60 | 90 |    |
| 392 | 60 |    |    |
| 393 | 60 |    |    |
| 394 | 61 |    |    |
| 395 | 61 |    |    |
| 396 | 61 |    |    |
| 397 | 61 |    |    |
| 398 | 62 |    |    |



|     |    |
|-----|----|
| 399 | 62 |
| 400 | 62 |
| 401 | 61 |
| 402 | 61 |
| 403 | 61 |
| 404 | 60 |
| 405 | 60 |
| 406 | 60 |
| 407 | 60 |
| 408 | 60 |
| 409 | 59 |
| 410 | 59 |
| 411 | 59 |
| 412 | 58 |
| 413 | 57 |
| 414 | 57 |
| 415 | 57 |
| 416 | 57 |
| 417 | 57 |
| 418 | 57 |
| 419 | 57 |
| 420 | 57 |
| 421 | 57 |
| 422 | 58 |
| 423 | 58 |
| 424 | 59 |
| 425 | 59 |
| 426 | 59 |
| 427 | 59 |
| 428 | 59 |
| 429 | 60 |
| 430 | 60 |
| 431 | 60 |
| 432 | 60 |
| 433 | 60 |
| 434 | 60 |
| 435 | 61 |
| 436 | 61 |
| 437 | 62 |
| 438 | 62 |
| 439 | 67 |
| 440 | 68 |
| 441 | 68 |
| 442 | 68 |
| 443 | 67 |
| 444 | 67 |
| 445 | 67 |
| 446 | 67 |
| 447 | 67 |
| 448 | 66 |

|     |    |
|-----|----|
| 449 | 66 |
| 450 | 66 |
| 451 | 65 |
| 452 | 65 |
| 453 | 65 |
| 454 | 61 |
| 455 | 60 |
| 456 | 59 |
| 457 | 59 |
| 458 | 59 |
| 459 | 59 |
| 460 | 59 |
| 461 | 58 |
| 462 | 58 |
| 463 | 58 |
| 464 |    |
| 465 |    |
| 466 |    |
| 467 |    |
| 468 |    |
| 469 |    |
| 470 |    |
| 471 |    |
| 472 |    |
| 473 |    |
| 474 |    |
| 475 |    |
| 476 |    |
| 477 |    |
| 478 |    |
| 479 |    |
| 480 |    |
| 481 |    |
| 482 |    |
| 483 |    |
| 484 |    |
| 485 |    |
| 486 |    |
| 487 |    |
| 488 |    |
| 489 |    |
| 490 |    |
| 491 |    |
| 492 |    |
| 493 |    |
| 494 |    |
| 495 |    |
| 496 |    |
| 497 |    |
| 498 |    |

499  
500  
501  
502  
503  
504  
505  
506  
507  
508  
509  
510  
511  
512  
513  
514  
515  
516  
517  
518  
519  
520  
521  
522  
523  
524  
525  
526  
527  
528  
529  
530  
531  
532  
533  
534  
535  
536  
537  
538  
539  
540  
541  
542  
543  
544  
545  
546  
547  
548

549  
550  
551  
552  
553  
554  
555  
556  
557  
558  
559  
560  
561  
562  
563  
564  
565  
566  
567  
568  
569  
570  
571  
572  
573  
574  
575  
576  
577  
578  
579  
580  
581  
582  
583  
584  
585  
586  
587  
588  
589  
590  
591  
592  
593  
594  
595  
596  
597  
598

599  
600  
601  
602  
603  
604  
605  
606  
607  
608  
609  
610  
611  
612  
613  
614  
615  
616  
617  
618  
619  
620  
621  
622  
623  
624  
625  
626  
627  
628  
629  
630  
631  
632  
633  
634  
635  
636  
637  
638  
639  
640  
641  
642  
643  
644  
645  
646  
647  
648

649  
650  
651  
652  
653  
654  
655  
656  
657  
658  
659  
660  
661  
662  
663  
664  
665  
666  
667  
668  
669  
670  
671  
672  
673  
674  
675  
676  
677  
678  
679  
680  
681  
682  
683  
684  
685  
686  
687  
688  
689  
690  
691  
692  
693  
694  
695  
696  
697  
698

699  
700  
701  
702  
703  
704  
705  
706  
707  
708  
709  
710  
711  
712  
713  
714  
715  
716  
717  
718  
719  
720  
721  
722  
723  
724  
725  
726  
727  
728  
729  
730  
731  
732  
733  
734  
735  
736  
737  
738  
739  
740  
741  
742  
743  
744  
745  
746  
747  
748

749  
750  
751  
752  
753  
754  
755  
756  
757  
758  
759  
760  
761  
762  
763  
764  
765  
766  
767  
768  
769  
770  
771  
772  
773  
774  
775  
776  
777  
778  
779  
780  
781  
782  
783  
784  
785  
786  
787  
788  
789  
790  
791  
792



| eUsr#3<br>App1 | eUsr#3<br>App2 | eUsr#3<br>App3 | eUsr#4<br>App1 | eUsr#4<br>App2 | eUsr#4<br>App3 | eUsr#5<br>App1 |    |
|----------------|----------------|----------------|----------------|----------------|----------------|----------------|----|
|                | 65             | 70             | 66             | 87             | 79             | 84             | 71 |
|                | 65             | 69             | 66             | 88             | 79             | 83             | 71 |
|                | 64             | 69             | 66             | 88             | 79             | 82             | 70 |
|                | 64             | 69             | 66             | 88             | 79             | 83             | 69 |
|                | 63             | 68             | 66             | 85             | 79             | 84             | 69 |
|                | 63             | 67             | 66             | 83             | 78             | 84             | 69 |
|                | 63             | 67             | 67             | 82             | 77             | 84             | 69 |
|                | 63             | 70             | 68             | 82             | 79             | 83             | 68 |
|                | 64             | 70             | 68             | 81             | 81             | 83             | 68 |
|                | 64             | 71             | 68             | 81             | 81             | 83             | 68 |
|                | 64             | 75             | 70             | 82             | 80             | 83             | 68 |
|                | 65             | 75             | 69             | 83             | 78             | 84             | 68 |
|                | 65             | 76             | 67             | 83             | 78             | 84             | 70 |
|                | 65             | 76             | 66             | 83             | 78             | 84             | 72 |
|                | 65             | 76             | 67             | 83             | 77             | 84             | 72 |
|                | 64             | 76             | 68             | 82             | 77             | 84             | 72 |
|                | 64             | 76             | 69             | 80             | 77             | 84             | 72 |
|                | 64             | 75             | 70             | 79             | 77             | 84             | 72 |
|                | 65             | 78             | 70             | 79             | 77             | 84             | 74 |
|                | 65             | 79             | 69             | 79             | 79             | 84             | 74 |
|                | 65             | 79             | 68             | 79             | 78             | 85             | 74 |
|                | 65             | 79             | 68             | 80             | 76             | 85             | 74 |
|                | 65             | 79             | 67             | 80             | 74             | 86             | 74 |
|                | 65             | 78             | 67             | 81             | 72             | 86             | 75 |
|                | 66             | 78             | 67             | 82             | 72             | 85             | 75 |
|                | 69             | 78             | 68             | 82             | 72             | 84             | 76 |
|                | 70             | 78             | 68             | 82             | 71             | 85             | 76 |
|                | 70             | 82             | 68             | 82             | 71             | 85             | 76 |
|                | 70             | 87             | 68             | 81             | 71             | 85             | 76 |
|                | 70             | 87             | 68             | 81             | 71             | 84             | 76 |
|                | 70             | 85             | 68             | 82             | 72             | 83             | 77 |
|                | 70             | 82             | 68             | 81             | 73             | 83             | 76 |
|                | 70             | 81             | 68             | 81             | 70             | 83             | 76 |
|                | 70             | 81             | 67             | 81             | 70             | 83             | 76 |
|                | 70             | 81             | 67             | 80             | 69             | 82             | 76 |
|                | 70             | 82             | 67             | 79             | 69             | 81             | 76 |
|                | 69             | 82             | 67             | 78             | 69             | 81             | 76 |
|                | 69             | 84             | 67             | 78             | 70             | 83             | 75 |
|                | 69             | 86             | 67             | 78             | 71             | 84             | 73 |
|                | 70             | 86             | 67             | 78             | 72             | 85             | 72 |
|                | 69             | 86             | 67             | 79             | 74             | 85             | 71 |
|                | 69             | 86             | 67             | 79             | 74             | 84             | 70 |
|                | 69             | 84             | 67             | 80             | 73             | 83             | 71 |
|                | 68             | 82             | 67             | 80             | 72             | 82             | 72 |
|                | 69             | 81             | 67             | 81             | 70             | 82             | 73 |
|                | 69             | 81             | 67             | 81             | 69             | 82             | 73 |
|                | 69             | 80             | 66             | 82             | 69             | 82             | 74 |
|                | 69             | 78             | 66             | 81             | 71             | 82             | 74 |

|    |    |    |    |    |    |    |
|----|----|----|----|----|----|----|
| 69 | 77 | 66 | 80 | 72 | 83 | 74 |
| 68 | 76 | 66 | 79 | 72 | 85 | 75 |
| 68 | 75 | 66 | 79 | 74 | 86 | 75 |
| 67 | 75 | 65 | 80 | 74 | 87 | 75 |
| 67 | 75 | 64 | 81 | 74 | 87 | 75 |
| 67 | 75 | 63 | 81 | 73 | 87 | 74 |
| 67 | 75 | 62 | 80 | 73 | 86 | 74 |
| 66 | 75 | 62 | 80 | 73 | 85 | 73 |
| 66 | 76 | 62 | 81 | 74 | 85 | 74 |
| 66 | 77 | 64 | 81 | 75 | 85 | 76 |
| 66 | 77 | 65 | 81 | 76 | 85 | 77 |
| 66 | 78 | 65 | 80 | 77 | 85 | 76 |
| 66 | 78 | 66 | 79 | 77 | 85 | 76 |
| 65 | 77 | 68 | 78 | 77 | 86 | 74 |
| 66 | 77 | 70 | 78 | 76 | 86 | 74 |
| 66 | 76 | 71 | 78 | 75 | 87 | 74 |
| 68 | 76 | 72 | 78 | 75 | 87 | 75 |
| 69 | 75 | 73 | 78 | 75 | 87 | 74 |
| 70 | 75 | 74 | 79 | 75 | 87 | 73 |
| 69 | 74 | 74 | 79 | 75 | 87 | 73 |
| 69 | 73 | 74 | 81 | 75 | 87 | 73 |
| 68 | 73 | 73 | 83 | 75 | 85 | 73 |
| 67 | 73 | 72 | 83 | 77 | 84 | 72 |
| 67 | 72 | 72 | 83 | 77 | 84 | 72 |
| 67 | 72 | 71 | 82 | 77 | 84 | 71 |
| 67 | 73 | 70 | 82 | 76 | 83 | 71 |
| 67 | 72 | 70 | 82 | 76 | 83 | 70 |
| 67 | 72 | 70 | 83 | 77 | 82 | 71 |
| 68 | 71 | 70 | 83 | 79 | 83 | 71 |
| 68 | 70 | 71 | 83 | 81 | 85 | 71 |
| 69 | 70 | 72 | 82 | 81 | 86 | 70 |
| 69 | 71 | 73 | 81 | 81 | 86 | 70 |
| 69 | 72 | 73 | 81 | 79 | 86 | 70 |
| 69 | 72 | 75 | 82 | 77 | 86 | 70 |
| 69 | 73 | 74 | 82 | 76 | 86 | 70 |
| 70 | 73 | 73 | 82 | 76 | 86 | 71 |
| 70 | 72 | 71 | 81 | 76 | 85 | 71 |
| 70 | 72 | 68 | 81 | 76 | 86 | 72 |
| 70 | 71 | 66 | 81 | 76 | 86 | 72 |
| 68 | 71 | 65 | 81 | 77 | 86 | 73 |
| 67 | 71 | 65 | 82 | 77 | 87 | 73 |
| 65 | 71 | 65 | 82 | 77 | 87 | 74 |
| 65 | 71 | 64 | 82 | 77 | 88 | 75 |
| 64 | 71 | 62 | 82 | 77 | 88 | 75 |
| 65 | 71 | 60 | 81 | 78 | 89 | 75 |
| 66 | 71 | 60 | 79 | 79 | 89 | 74 |
| 67 | 73 | 60 | 78 | 79 | 88 | 74 |
| 68 | 75 | 59 | 79 | 78 | 87 | 74 |
| 70 | 75 | 62 | 80 | 78 | 86 | 74 |
| 72 | 75 | 64 | 80 | 78 | 85 | 74 |

|    |    |    |    |    |    |    |
|----|----|----|----|----|----|----|
| 72 | 73 | 68 | 80 | 78 | 86 | 74 |
| 75 | 73 | 74 | 80 | 78 | 87 | 74 |
| 75 | 73 | 76 | 79 | 78 | 89 | 74 |
| 74 | 73 | 76 | 79 | 79 | 88 | 75 |
| 73 | 73 | 74 | 80 | 80 | 88 | 75 |
| 72 | 73 | 74 | 80 | 80 | 87 | 73 |
| 72 | 74 | 75 | 80 | 80 | 86 | 73 |
| 71 | 73 | 76 | 80 | 79 | 85 | 73 |
| 71 | 73 | 78 | 79 | 78 | 83 | 73 |
| 72 | 72 | 81 | 79 | 79 | 82 | 74 |
| 71 | 72 | 81 | 79 | 79 | 81 | 74 |
| 72 | 72 | 80 | 79 | 79 | 81 | 75 |
| 73 | 72 | 78 | 80 | 79 | 81 | 76 |
| 73 | 72 | 76 | 81 | 79 | 81 | 76 |
| 71 | 72 | 74 | 82 | 78 | 81 | 76 |
| 70 | 73 | 75 | 81 | 78 | 81 | 76 |
| 69 | 73 | 76 | 81 | 79 | 82 | 76 |
| 69 | 73 | 76 | 80 | 80 | 82 | 76 |
| 69 | 72 | 76 | 80 | 80 | 82 | 76 |
| 69 | 72 | 76 | 81 | 80 | 80 | 76 |
| 69 | 72 | 76 | 82 | 77 | 78 | 76 |
| 69 | 72 | 76 | 81 | 75 | 78 | 74 |
| 69 | 72 | 75 | 80 | 73 | 78 | 72 |
| 69 | 73 | 75 | 80 | 73 | 78 | 72 |
| 68 | 73 | 75 | 79 | 73 | 79 | 72 |
| 68 | 72 | 74 | 79 | 73 | 80 | 72 |
| 66 | 70 | 74 | 79 | 74 | 82 | 72 |
| 65 | 70 | 73 | 79 | 74 | 82 | 72 |
| 65 | 70 | 72 | 79 | 75 | 82 | 72 |
| 64 | 71 | 71 | 79 | 75 | 82 | 73 |
| 65 | 72 | 70 | 79 | 76 | 82 | 73 |
| 67 | 73 | 70 | 80 | 76 | 83 | 73 |
| 68 | 72 | 70 | 80 | 74 | 82 | 73 |
| 67 | 71 | 71 | 81 | 72 | 83 | 74 |
| 67 | 70 | 70 | 82 | 72 | 83 | 74 |
| 67 | 69 | 70 | 83 | 74 | 84 | 77 |
| 67 | 69 | 69 | 82 | 76 | 85 | 81 |
| 66 | 69 | 69 | 82 | 75 | 84 | 80 |
| 66 | 68 | 68 | 83 | 73 | 84 | 78 |
| 65 | 68 | 68 | 83 | 73 | 84 | 76 |
| 65 | 68 | 68 | 83 | 73 | 83 | 73 |
| 65 | 68 | 69 | 82 | 74 | 83 | 72 |
| 64 | 68 | 69 | 82 | 76 | 84 | 71 |
| 64 | 70 | 69 | 82 | 76 | 84 | 72 |
| 64 | 71 | 68 | 82 | 76 | 83 | 73 |
| 65 | 71 | 67 | 83 | 73 | 83 | 72 |
| 65 | 71 | 67 | 82 | 71 | 82 | 72 |
| 67 | 71 | 67 | 83 | 71 | 81 | 72 |
| 66 | 71 | 67 | 83 | 74 | 80 | 72 |
| 65 | 73 | 68 | 82 | 74 | 80 | 72 |

|    |    |    |    |    |    |    |
|----|----|----|----|----|----|----|
| 65 | 74 | 69 | 82 | 74 | 81 | 71 |
| 65 | 74 | 69 | 81 | 72 | 81 | 70 |
| 64 | 72 | 70 | 82 | 72 | 81 | 69 |
| 64 | 70 | 70 | 82 | 73 | 81 | 68 |
| 64 | 69 | 70 | 82 | 74 | 81 | 68 |
| 64 | 69 | 70 | 82 | 74 | 81 | 68 |
| 63 | 69 | 70 | 83 | 75 | 82 | 68 |
| 63 | 69 | 70 | 83 | 75 | 82 | 68 |
| 65 | 69 | 70 | 84 | 74 | 83 | 69 |
| 65 | 71 | 71 | 84 | 72 | 82 | 71 |
| 70 | 73 | 72 | 85 | 72 | 81 | 73 |
| 74 | 74 | 73 | 85 | 73 | 81 | 73 |
| 74 | 74 | 75 | 85 | 75 | 79 | 72 |
| 75 | 75 | 77 | 87 | 75 | 80 | 71 |
| 75 | 75 | 77 | 87 | 74 | 80 | 70 |
| 75 | 72 | 75 | 88 | 74 | 80 | 70 |
| 76 | 70 | 74 | 86 | 74 | 80 | 69 |
| 81 | 69 | 73 | 85 | 74 | 80 | 68 |
| 81 | 68 | 72 | 84 | 74 | 81 | 68 |
| 79 | 68 | 71 | 83 | 73 | 81 | 68 |
| 77 | 68 | 70 | 82 | 73 | 81 | 68 |
| 76 | 70 | 70 | 82 | 74 | 80 | 70 |
| 76 | 70 | 70 | 82 | 74 | 79 | 71 |
| 75 | 70 | 69 | 82 | 76 | 78 | 72 |
| 76 | 69 | 69 | 82 | 77 | 78 | 73 |
| 78 | 69 | 70 | 82 | 78 | 78 | 73 |
| 79 | 68 | 70 | 82 | 78 | 79 | 74 |
| 79 | 67 | 70 | 84 | 79 | 79 | 74 |
| 78 | 67 | 70 | 84 | 79 | 78 | 74 |
| 75 | 67 | 69 | 84 | 79 | 78 | 74 |
| 74 | 68 | 70 | 83 | 79 | 79 | 74 |
| 74 | 68 | 70 | 81 | 79 | 79 | 74 |
| 73 | 67 | 70 | 81 | 79 | 79 | 74 |
| 73 | 67 | 70 | 82 | 79 | 80 | 74 |
| 73 | 67 | 70 | 82 | 78 | 81 | 74 |
| 73 | 67 | 70 | 83 | 76 | 81 | 73 |
| 74 | 67 | 69 | 83 | 76 | 81 | 73 |
| 75 | 67 | 69 | 84 | 76 | 80 | 73 |
| 75 | 67 | 68 | 85 | 75 | 80 | 73 |
| 75 |    | 68 | 85 | 75 | 79 | 73 |
| 75 |    | 68 | 84 |    | 79 | 73 |
| 74 |    | 69 | 83 |    | 79 | 73 |
| 74 |    | 70 | 83 |    | 79 | 73 |
| 74 |    | 71 | 83 |    | 79 | 73 |
| 73 |    | 71 | 83 |    | 80 | 75 |
| 73 |    | 71 | 83 |    | 81 | 76 |
| 72 |    | 71 | 82 |    | 81 | 76 |
| 71 |    | 70 | 80 |    | 81 | 76 |
| 70 |    | 70 | 79 |    | 81 | 75 |
| 69 |    | 69 | 78 |    | 82 | 75 |

|    |    |    |    |    |
|----|----|----|----|----|
| 69 | 69 | 78 | 82 | 75 |
| 68 | 69 | 79 | 81 | 74 |
| 68 | 69 | 80 | 81 | 74 |
| 68 | 69 | 80 | 81 | 73 |
| 68 | 68 | 80 | 81 | 73 |
| 68 | 68 | 79 | 81 | 73 |
| 69 | 68 | 78 | 81 | 74 |
| 70 | 68 | 77 | 81 | 73 |
| 70 | 69 | 76 | 83 | 73 |
| 71 | 69 | 76 | 83 | 73 |
| 71 | 69 | 76 | 83 | 73 |
| 70 | 69 | 77 | 83 | 73 |
| 70 | 69 | 79 | 83 | 74 |
| 70 | 69 | 79 | 83 | 75 |
| 70 | 69 | 80 | 82 | 75 |
| 69 | 70 | 81 | 82 | 75 |
| 69 | 71 | 81 | 82 | 75 |
| 68 | 71 | 81 | 82 | 74 |
| 66 | 71 | 81 | 82 | 74 |
| 65 | 70 | 81 | 82 | 73 |
| 65 | 70 | 82 | 83 | 73 |
| 66 | 72 | 82 | 84 | 74 |
| 66 | 73 | 83 | 84 | 74 |
| 66 | 73 | 83 | 83 | 74 |
| 66 | 73 | 83 | 83 | 74 |
| 66 | 74 | 81 | 81 | 74 |
| 66 | 74 | 79 | 81 | 75 |
| 66 | 74 | 78 | 81 | 76 |
| 65 | 74 | 78 | 81 | 76 |
| 65 | 76 | 78 | 82 | 76 |
| 64 | 75 | 78 | 82 | 76 |
| 63 | 73 | 79 | 83 | 76 |
| 63 | 71 | 79 | 83 | 76 |
| 63 | 71 | 79 | 84 | 76 |
| 63 | 70 | 78 | 84 | 76 |
| 63 | 69 | 77 | 83 | 76 |
| 63 | 69 | 78 | 82 | 76 |
| 63 | 69 | 78 | 80 | 75 |
| 63 | 69 | 78 | 80 | 75 |
| 66 | 69 | 78 | 80 | 74 |
| 66 | 68 | 77 | 82 | 73 |
| 66 | 68 | 79 | 83 | 73 |
| 66 | 67 | 80 | 84 | 72 |
| 66 | 67 | 80 | 85 | 71 |
| 66 | 69 | 81 | 85 | 71 |
| 67 | 70 | 81 | 84 | 71 |
| 70 | 70 | 80 | 84 | 72 |
| 70 | 70 | 80 | 83 | 72 |
| 67 | 71 | 80 | 83 | 73 |
| 65 | 70 | 80 | 82 | 73 |

|    |    |    |    |    |
|----|----|----|----|----|
| 64 | 70 | 80 | 82 | 73 |
| 64 | 70 | 80 | 82 | 73 |
| 64 | 71 | 80 | 83 | 74 |
| 65 | 71 | 82 | 83 | 74 |
| 66 | 71 | 82 | 82 | 74 |
| 66 | 71 | 83 | 80 | 74 |
| 66 | 71 | 82 | 80 | 74 |
| 67 | 71 | 82 | 81 | 74 |
| 67 | 71 | 82 | 81 | 74 |
| 67 | 71 | 82 | 81 | 74 |
| 67 | 71 | 81 | 81 | 74 |
| 66 | 70 | 80 | 81 | 74 |
| 67 | 70 | 79 | 80 | 74 |
| 67 | 69 | 78 | 79 | 74 |
| 68 | 69 | 78 | 77 | 74 |
| 68 | 69 | 79 | 77 | 74 |
| 68 | 65 | 80 | 78 | 74 |
| 68 | 64 | 80 | 78 | 75 |
| 67 | 64 | 79 | 78 | 75 |
| 67 | 64 | 79 | 79 | 76 |
| 67 | 64 | 80 | 80 | 78 |
| 67 | 65 | 80 | 82 | 79 |
| 66 | 65 | 79 | 83 | 79 |
| 67 | 65 | 78 | 84 | 78 |
| 67 | 66 | 77 | 83 | 77 |
| 67 | 66 | 77 | 82 | 76 |
| 67 | 66 | 78 | 80 | 75 |
| 67 | 66 | 78 | 79 | 75 |
| 67 | 66 | 79 | 79 | 75 |
| 67 | 69 | 80 | 79 | 74 |
| 67 | 69 | 80 | 80 | 74 |
| 67 | 71 | 80 | 81 | 73 |
| 67 | 71 | 80 | 82 | 73 |
| 67 | 69 | 80 | 83 | 73 |
| 67 | 69 | 79 | 84 | 73 |
| 67 | 67 | 78 | 84 | 74 |
| 67 | 67 | 77 | 83 | 74 |
| 67 | 67 | 77 | 81 | 75 |
| 67 | 67 | 76 | 81 | 76 |
| 68 | 67 | 76 | 81 | 77 |
| 67 | 68 | 76 | 82 | 77 |
| 66 | 68 | 76 | 82 | 77 |
| 66 | 68 | 78 | 82 | 76 |
| 65 | 67 | 79 | 80 | 76 |
| 65 | 66 | 79 | 79 | 76 |
| 65 | 65 | 78 | 78 | 77 |
| 66 | 65 | 77 | 78 | 78 |
| 66 | 65 | 76 | 77 | 78 |
| 66 | 65 | 76 | 78 | 77 |
| 66 | 65 | 77 | 79 | 78 |

|    |    |    |    |
|----|----|----|----|
| 66 | 77 | 80 | 78 |
| 66 | 77 | 79 | 77 |
| 66 | 78 | 78 | 77 |
| 66 | 78 | 78 | 77 |
| 65 | 79 | 78 | 77 |
| 65 | 79 | 79 | 78 |
| 64 | 79 | 79 | 78 |
| 65 | 78 | 79 | 77 |
| 65 | 77 | 79 | 77 |
| 65 | 76 | 79 | 76 |
| 66 | 76 | 79 | 76 |
| 66 | 78 | 80 | 75 |
| 66 | 79 | 80 | 74 |
| 66 | 80 | 81 | 71 |
| 66 | 80 | 81 | 70 |
| 66 | 79 | 81 | 69 |
| 66 | 78 | 81 | 70 |
| 67 | 77 | 81 | 70 |
| 68 | 77 | 81 | 70 |
| 68 | 78 | 79 | 71 |
| 68 | 79 | 77 | 71 |
| 68 | 80 | 77 | 71 |
| 68 | 81 | 78 | 72 |
| 67 | 82 | 80 | 72 |
| 66 | 82 | 81 | 73 |
| 66 | 82 | 82 | 72 |
| 66 | 82 | 83 | 71 |
| 66 | 82 | 83 | 71 |
| 66 | 82 | 83 | 70 |
| 68 | 81 | 83 | 70 |
| 70 | 81 | 84 | 69 |
| 71 | 80 | 83 | 69 |
| 70 | 79 | 82 | 69 |
| 70 | 78 | 82 | 70 |
| 69 | 77 | 82 | 71 |
| 69 | 77 | 83 | 73 |
| 68 | 76 | 83 | 74 |
| 68 | 76 | 83 | 74 |
| 68 | 75 | 83 | 73 |
| 70 | 75 | 85 | 72 |
| 70 | 75 | 87 | 72 |
| 70 | 75 | 85 | 72 |
| 69 | 75 | 85 | 72 |
| 69 | 74 | 86 | 72 |
| 68 | 74 | 87 | 72 |
| 68 | 73 | 87 | 73 |
| 68 | 74 | 87 | 73 |
| 65 | 74 |    | 75 |
| 64 | 74 |    | 75 |
| 63 | 74 |    | 75 |

|    |    |    |
|----|----|----|
| 58 | 74 | 75 |
| 58 | 75 | 74 |
| 57 | 78 | 73 |
| 58 | 79 | 73 |
| 63 | 80 | 73 |
| 64 | 80 | 73 |
| 65 | 80 | 73 |
| 66 | 80 | 74 |
| 67 | 80 | 73 |
| 67 | 82 | 70 |
| 68 | 83 | 70 |
| 69 | 83 | 69 |
| 68 | 83 | 68 |
| 68 | 83 | 68 |
| 69 | 83 | 68 |
| 70 | 83 | 68 |
| 70 | 83 | 68 |
| 70 | 80 | 67 |
| 70 | 79 | 66 |
| 69 | 79 | 66 |
| 69 | 79 | 67 |
| 69 | 79 | 67 |
| 69 | 79 | 67 |
| 68 |    | 67 |
| 68 |    | 67 |
| 67 |    | 67 |
| 67 |    | 67 |
| 67 |    | 67 |
| 67 |    | 68 |
| 68 |    | 69 |
| 68 |    | 70 |
| 68 |    | 70 |
| 68 |    | 70 |
| 68 |    | 68 |
| 68 |    | 67 |
| 68 |    | 66 |
| 68 |    | 66 |
| 68 |    | 66 |
| 68 |    | 67 |
| 67 |    | 69 |
| 68 |    | 70 |
| 68 |    | 70 |
| 68 |    | 70 |
| 67 |    | 70 |
| 67 |    | 70 |
| 67 |    | 70 |
| 67 |    | 70 |
| 66 |    | 70 |
| 66 |    | 70 |
| 67 |    | 70 |



|    |    |
|----|----|
| 67 | 72 |
| 67 | 72 |
| 67 | 73 |
| 66 | 72 |
| 66 | 72 |
| 67 | 71 |
| 67 | 70 |
| 67 | 69 |
| 67 | 69 |
| 67 | 68 |
| 67 | 68 |
| 66 | 68 |
| 65 | 68 |
| 64 | 68 |
| 63 | 68 |
| 63 | 68 |
| 64 | 69 |
| 65 | 72 |
| 65 | 76 |
| 65 | 78 |
| 65 | 78 |
| 65 | 77 |
| 65 | 76 |
| 65 | 75 |
| 66 | 75 |
| 66 | 73 |
| 65 | 72 |
| 65 | 71 |
| 64 | 70 |
| 64 | 69 |
| 64 | 68 |
| 64 | 68 |
| 64 | 68 |
| 64 | 68 |
| 64 | 68 |
| 64 | 67 |
| 64 | 67 |
| 64 | 67 |
| 64 | 68 |
| 64 | 69 |
| 64 | 71 |
| 64 | 71 |
| 64 | 71 |
| 64 | 70 |
| 65 | 69 |
| 64 | 69 |
| 64 | 68 |
| 64 | 68 |
| 63 | 68 |
| 63 | 68 |

|    |    |
|----|----|
| 64 | 67 |
| 66 | 67 |
| 66 | 70 |
| 65 | 72 |
| 65 | 73 |
| 64 | 73 |
| 64 | 73 |
| 63 | 73 |
| 63 | 72 |
| 63 | 71 |
| 64 | 70 |
| 65 | 70 |
| 65 | 70 |
| 65 | 70 |
| 65 | 70 |
| 65 | 70 |
| 66 | 70 |
| 66 | 71 |
| 66 | 72 |
| 66 | 73 |
| 67 | 73 |
| 67 | 73 |
| 66 | 73 |
| 66 | 73 |
| 66 | 73 |
| 66 | 73 |
| 66 | 73 |
| 66 | 73 |
| 67 | 73 |
| 67 | 73 |
| 67 | 74 |
| 66 | 75 |
| 66 | 75 |
| 66 | 76 |
| 66 | 76 |
| 66 | 77 |
| 66 | 77 |
| 66 | 76 |
| 65 | 75 |
| 65 | 75 |
| 64 | 77 |
| 64 | 77 |
| 64 | 78 |
| 65 | 78 |
| 67 | 77 |
| 67 | 75 |
| 68 | 74 |
| 68 | 73 |
| 68 | 73 |
| 66 | 73 |

|    |    |
|----|----|
| 65 | 73 |
| 65 | 71 |
| 65 | 70 |
| 65 | 70 |
| 66 | 70 |
| 72 | 70 |
| 74 | 69 |
| 75 | 68 |
| 76 | 68 |
| 76 | 70 |
| 76 | 71 |
| 76 | 71 |
| 75 | 70 |
| 75 | 70 |
| 75 | 69 |
| 75 | 69 |
| 74 | 69 |
| 74 | 68 |
| 73 | 68 |
| 71 | 68 |
| 69 | 70 |
| 68 | 72 |
| 67 | 73 |
| 68 | 73 |
| 68 | 73 |
| 68 | 72 |
| 68 | 72 |
| 68 | 72 |
| 68 | 72 |
| 68 | 72 |
| 67 | 70 |
| 67 | 70 |
| 67 | 70 |
| 67 | 70 |
| 67 | 69 |
| 68 | 69 |
| 67 | 69 |
| 67 | 69 |
| 68 | 69 |
| 69 | 70 |
| 69 | 71 |
| 68 | 72 |
| 69 | 72 |
| 69 | 73 |
| 69 | 74 |
| 68 | 74 |
| 68 | 74 |
| 68 | 74 |
| 68 | 74 |
| 69 | 74 |
| 68 | 75 |

|    |    |
|----|----|
| 67 | 77 |
| 67 | 77 |
| 66 | 78 |
| 66 | 78 |
| 66 | 78 |
| 67 | 75 |
| 66 | 74 |
| 66 | 74 |
| 66 | 72 |
| 66 | 72 |
| 66 | 73 |
| 67 | 73 |
| 68 | 73 |
| 70 | 73 |
| 73 | 72 |
| 76 | 72 |
| 78 | 72 |
| 79 | 72 |
| 80 | 72 |
| 81 | 70 |
| 81 | 70 |
| 81 | 70 |
| 80 | 69 |
| 79 | 69 |
| 79 | 70 |
| 77 | 72 |
| 73 | 73 |
| 73 | 73 |
| 71 | 73 |
| 70 | 73 |
| 70 | 73 |
| 70 | 73 |
| 70 | 73 |
| 69 | 71 |
| 69 | 70 |
| 68 | 71 |
| 68 | 71 |
| 68 | 72 |
| 67 | 72 |
| 66 | 73 |
| 66 | 74 |
| 66 | 75 |
| 67 | 75 |
| 68 | 75 |
| 68 | 75 |
| 67 | 75 |
| 66 | 75 |
| 65 | 75 |
| 64 | 75 |
| 64 | 75 |

|    |    |
|----|----|
| 65 | 75 |
| 65 | 75 |
| 66 | 75 |
| 66 | 75 |
| 66 | 75 |
| 65 | 74 |
| 64 | 74 |
| 64 | 73 |
| 64 | 72 |
| 64 | 71 |
| 65 | 71 |
| 65 | 71 |
| 66 | 72 |
| 66 | 74 |
| 66 | 74 |
| 66 | 74 |
| 66 | 74 |
| 66 | 73 |
| 66 | 72 |
| 65 | 72 |
| 65 | 71 |
| 66 | 71 |
| 67 | 71 |
| 70 | 71 |
| 72 | 71 |
| 72 | 71 |
| 70 | 71 |
| 67 | 71 |
| 65 | 71 |
| 63 | 71 |
| 63 | 71 |
| 62 | 73 |
| 62 | 73 |
| 63 | 73 |
| 65 | 73 |
| 67 | 73 |
| 68 | 72 |
| 68 | 71 |
| 67 | 70 |
| 65 | 70 |
| 64 | 70 |
| 63 | 74 |
| 63 | 74 |
| 63 | 77 |
| 64 | 78 |
| 64 | 78 |
| 65 | 79 |
| 65 | 79 |
| 66 | 80 |
| 66 | 80 |

|    |    |
|----|----|
| 67 | 80 |
| 67 | 79 |
| 67 | 78 |
| 67 | 76 |
| 66 | 74 |
| 66 | 74 |
| 67 | 73 |
| 68 | 71 |
| 70 | 71 |
| 72 | 71 |
| 73 | 70 |
| 72 | 71 |
| 70 | 72 |
| 68 | 71 |
| 67 | 70 |
| 66 | 69 |
| 66 | 69 |
| 66 | 70 |
| 66 | 70 |
| 66 | 70 |
| 66 | 71 |
| 67 | 72 |
| 66 | 73 |
| 65 | 72 |
| 65 | 72 |
| 65 | 72 |
| 65 | 73 |
| 65 | 74 |
| 65 | 75 |
| 65 | 75 |
| 64 | 75 |
| 65 | 75 |
| 65 | 75 |
| 65 | 76 |
| 65 | 76 |
| 65 | 76 |
| 65 | 76 |
| 65 | 75 |
| 65 | 75 |
| 66 | 72 |
| 67 | 70 |
| 68 | 70 |
| 68 | 70 |
| 69 | 70 |
| 69 | 70 |
| 70 | 71 |
| 70 | 72 |
| 70 | 72 |
| 71 | 72 |
| 71 | 72 |

|    |    |
|----|----|
| 71 | 71 |
| 71 | 71 |
| 70 | 71 |
| 70 | 71 |
| 70 | 71 |
| 71 | 70 |
| 76 | 69 |
| 77 | 69 |
| 84 | 70 |
| 84 | 71 |
| 82 | 73 |
| 81 |    |
| 78 |    |
| 77 |    |
| 74 |    |
| 74 |    |
| 75 |    |
| 75 |    |
| 75 |    |
| 75 |    |
| 75 |    |
| 74 |    |
| 73 |    |
| 73 |    |
| 72 |    |
| 72 |    |
| 72 |    |
| 72 |    |
| 71 |    |
| 71 |    |
| 71 |    |
| 71 |    |
| 70 |    |
| 70 |    |
| 70 |    |
| 70 |    |
| 70 |    |
| 71 |    |
| 71 |    |
| 72 |    |
| 72 |    |
| 72 |    |
| 72 |    |
| 72 |    |
| 71 |    |
| 71 |    |
| 69 |    |
| 69 |    |
| 69 |    |
| 68 |    |

67  
67  
67  
73  
76  
75  
73  
71  
70  
70  
70  
70  
71  
72  
72  
72  
71  
71  
71  
70  
69  
69  
69  
69  
69  
70  
71  
71  
71  
72  
71  
71  
71  
73  
75  
75  
75  
75  
75  
71  
71  
70  
69  
69



| eUsr#5<br>App2 | eUsr#5<br>App3 | eUsr#6<br>App1 | eUsr#6<br>App2 | eUsr#6<br>App3 | eUsr#7<br>App1 | eUsr#7<br>App2 |    |
|----------------|----------------|----------------|----------------|----------------|----------------|----------------|----|
|                | 74             | 68             | 76             | 81             | 79             | 74             | 73 |
|                | 75             | 68             | 78             | 84             | 79             | 74             | 72 |
|                | 74             | 68             | 79             | 85             | 79             | 73             | 82 |
|                | 74             | 68             | 78             | 86             | 73             | 73             | 82 |
|                | 73             | 68             | 78             | 86             | 72             | 73             | 76 |
|                | 72             | 68             | 77             | 85             | 73             | 73             | 76 |
|                | 71             | 68             | 76             | 78             | 75             | 73             | 76 |
|                | 71             | 72             | 78             | 75             | 77             | 75             | 82 |
|                | 72             | 73             | 79             | 75             | 79             | 75             | 82 |
|                | 72             | 73             | 79             | 75             | 81             | 75             | 76 |
|                | 72             | 74             | 79             | 74             | 82             | 75             | 76 |
|                | 72             | 74             | 80             | 74             | 81             | 75             | 75 |
|                | 72             | 75             | 80             | 75             | 79             | 74             | 76 |
|                | 73             | 76             | 80             | 75             | 78             | 75             | 76 |
|                | 73             | 76             | 79             | 75             | 77             | 75             | 82 |
|                | 74             | 75             | 81             | 74             | 77             | 75             | 84 |
|                | 74             | 75             | 84             | 75             | 77             | 75             | 84 |
|                | 73             | 75             | 86             | 76             | 76             | 75             | 84 |
|                | 72             | 75             | 85             | 76             | 73             | 74             | 83 |
|                | 71             | 74             | 84             | 77             | 71             | 74             | 79 |
|                | 70             | 74             | 84             | 77             | 71             | 74             | 76 |
|                | 70             | 74             | 85             | 80             | 71             | 74             | 72 |
|                | 70             | 74             | 86             | 81             | 71             | 74             | 73 |
|                | 71             | 74             | 87             | 81             | 71             | 75             | 73 |
|                | 72             | 74             | 86             | 81             | 71             | 75             | 73 |
|                | 74             | 75             | 85             | 80             | 74             | 76             | 72 |
|                | 78             | 77             | 83             | 80             | 76             | 76             | 72 |
|                | 78             | 76             | 78             | 80             | 76             | 76             | 72 |
|                | 78             | 75             | 75             | 80             | 74             | 76             | 72 |
|                | 79             | 75             | 74             | 79             | 73             | 76             | 72 |
|                | 79             | 74             | 74             | 79             | 74             | 77             | 76 |
|                | 79             | 73             | 75             | 79             | 76             | 76             | 76 |
|                | 81             | 72             | 77             | 79             | 77             | 76             | 76 |
|                | 80             | 72             | 78             | 80             | 77             | 76             | 76 |
|                | 79             | 71             | 81             | 80             | 74             | 76             | 81 |
|                | 78             | 72             | 83             | 80             | 72             | 76             | 81 |
|                | 77             | 73             | 83             | 80             | 71             | 76             | 81 |
|                | 76             | 73             | 83             | 80             | 72             | 75             | 81 |
|                | 76             | 73             | 80             | 79             | 72             | 73             | 81 |
|                | 73             | 74             | 75             | 78             | 72             | 76             | 76 |
|                | 72             | 74             | 73             | 78             | 72             | 74             | 76 |
|                | 73             | 75             | 73             | 78             | 71             | 73             | 72 |
|                | 74             | 74             | 72             | 79             | 71             | 76             | 72 |
|                | 74             | 74             | 71             | 80             | 72             | 76             | 73 |
|                | 74             | 74             | 71             | 80             | 73             | 73             | 74 |
|                | 74             | 74             | 71             | 79             | 74             | 73             | 74 |
|                | 74             | 74             | 69             | 79             | 74             | 74             | 74 |
|                | 73             | 74             | 69             | 79             | 75             | 74             | 74 |

|    |    |    |    |    |    |    |
|----|----|----|----|----|----|----|
| 72 | 74 | 69 | 79 | 76 | 74 | 74 |
| 72 | 74 | 72 | 78 | 77 | 75 | 75 |
| 71 | 74 | 76 | 77 | 77 | 75 | 80 |
| 71 | 74 | 75 | 77 | 77 | 75 | 80 |
| 71 | 74 | 74 | 76 | 77 | 75 | 80 |
| 73 | 74 | 74 | 75 | 77 | 74 | 80 |
| 74 | 74 | 75 | 75 | 77 | 74 | 80 |
| 76 | 75 | 76 | 75 | 78 | 73 | 75 |
| 76 | 75 | 76 | 75 | 79 | 74 | 74 |
| 75 | 75 | 76 | 76 | 79 | 76 | 74 |
| 74 | 75 | 75 | 77 | 79 | 79 | 72 |
| 72 | 75 | 74 | 79 | 78 | 76 | 72 |
| 70 | 74 | 76 | 81 | 78 | 76 | 73 |
| 70 | 73 | 77 | 81 | 77 | 74 | 73 |
| 69 | 72 | 78 | 83 | 77 | 74 | 73 |
| 69 | 72 | 79 | 83 | 77 | 74 | 73 |
| 68 | 72 | 80 | 83 | 76 | 75 | 75 |
| 68 | 73 | 83 | 83 | 75 | 74 | 81 |
| 68 | 73 | 84 | 83 | 74 | 73 | 81 |
| 68 | 74 | 84 | 83 | 73 | 73 | 81 |
| 68 | 74 | 85 | 83 | 73 | 73 | 76 |
| 68 | 74 | 85 | 83 | 73 | 73 | 76 |
| 68 | 74 | 85 | 83 | 73 | 76 | 81 |
| 69 | 74 | 83 | 83 | 74 | 76 | 76 |
| 70 | 75 | 83 | 83 | 75 | 76 | 81 |
| 71 | 76 | 83 | 83 | 75 | 76 | 81 |
| 71 | 76 | 83 | 83 | 75 | 73 | 76 |
| 71 | 76 | 83 | 83 | 75 | 73 | 72 |
| 71 | 75 | 83 | 83 | 75 | 74 | 73 |
| 72 | 75 | 82 | 85 | 77 | 74 | 73 |
| 73 | 75 | 80 | 87 | 79 | 76 | 73 |
| 74 | 75 | 79 | 87 | 79 | 76 | 73 |
| 74 | 74 | 80 | 88 | 79 | 76 | 73 |
| 75 | 74 | 80 | 89 | 80 | 76 | 73 |
| 78 | 73 | 79 | 89 | 80 | 75 | 73 |
| 78 | 73 | 79 | 89 | 80 | 75 | 80 |
| 77 | 73 | 79 | 88 | 81 | 75 | 81 |
| 76 | 73 | 79 | 87 | 80 | 76 | 81 |
| 75 | 72 | 80 | 85 | 80 | 76 | 75 |
| 74 | 72 | 80 | 85 | 78 | 73 | 72 |
| 74 | 72 | 80 | 84 | 78 | 73 | 74 |
| 74 | 72 | 81 | 82 | 78 | 74 | 73 |
| 73 | 71 | 80 | 80 | 78 | 75 | 74 |
| 72 | 70 | 80 | 81 | 78 | 75 | 81 |
| 72 | 70 | 79 | 80 | 78 | 75 | 81 |
| 72 | 70 | 78 | 80 | 78 | 74 | 76 |
| 72 | 71 | 77 | 80 | 78 | 74 | 80 |
| 72 | 71 | 77 | 80 | 79 | 74 | 76 |
| 71 | 71 | 77 | 80 | 79 | 74 | 79 |
| 71 | 72 | 77 | 80 | 80 | 74 | 76 |

|    |    |    |    |    |    |    |
|----|----|----|----|----|----|----|
| 71 | 73 | 77 | 80 | 81 | 74 | 79 |
| 71 | 73 | 76 | 80 | 80 | 74 | 75 |
| 71 | 73 | 77 | 80 | 79 | 74 | 75 |
| 71 | 73 | 77 | 80 | 79 | 75 | 75 |
| 71 | 74 | 77 | 80 | 79 | 75 | 75 |
| 71 | 74 | 77 | 80 | 79 | 73 | 75 |
| 71 | 74 | 78 | 80 | 77 | 73 | 75 |
| 71 | 74 | 78 | 81 | 75 | 73 | 74 |
| 72 | 75 | 79 | 82 | 75 | 73 | 74 |
| 72 | 76 | 78 | 85 | 75 | 74 | 73 |
| 72 | 76 | 78 | 85 | 75 | 74 | 74 |
| 72 | 76 | 77 | 84 | 76 | 75 | 76 |
| 72 | 75 | 77 | 84 | 75 | 76 | 76 |
| 72 | 75 | 77 | 85 | 75 | 76 | 76 |
| 72 | 75 | 77 | 84 | 76 | 76 | 74 |
| 71 | 74 | 78 | 84 | 76 | 76 | 74 |
| 71 | 74 | 78 | 84 | 75 | 76 | 74 |
| 70 | 75 | 76 | 84 | 76 | 76 | 74 |
| 70 | 75 | 76 | 83 | 78 | 76 | 74 |
| 70 | 76 | 77 |    | 81 | 76 | 73 |
| 70 | 77 | 78 |    | 82 | 76 | 74 |
| 70 | 77 | 78 |    | 83 | 74 | 72 |
| 70 | 77 | 78 |    | 83 | 76 | 76 |
| 70 | 78 | 79 |    | 83 | 76 | 76 |
| 70 | 79 | 79 |    | 83 | 79 | 82 |
| 71 | 79 | 80 |    | 82 | 80 | 82 |
| 71 | 79 | 80 |    | 81 | 80 | 82 |
| 70 | 79 | 80 |    | 79 | 80 | 82 |
| 70 | 79 | 80 |    | 78 | 82 | 82 |
| 70 | 79 | 80 |    | 78 | 73 | 82 |
| 71 | 79 | 81 |    | 78 | 73 | 82 |
| 71 | 79 | 80 |    | 78 | 73 | 82 |
| 72 | 78 | 80 |    | 78 | 73 | 82 |
| 73 | 78 | 81 |    | 78 | 74 | 73 |
| 73 | 78 | 82 |    | 79 | 74 | 73 |
| 73 | 78 | 81 |    | 79 | 80 | 73 |
| 73 | 80 | 81 |    | 78 | 80 | 73 |
| 73 | 80 | 78 |    | 78 | 80 | 73 |
| 73 | 80 | 74 |    | 78 | 80 | 73 |
| 73 | 76 | 73 |    | 78 | 76 | 81 |
| 74 | 76 | 73 |    | 77 | 73 | 81 |
| 75 | 76 | 73 |    | 77 | 79 | 81 |
| 75 | 76 | 76 |    | 76 | 76 | 81 |
| 74 | 76 | 77 |    | 76 | 79 | 74 |
| 75 | 78 | 79 |    | 76 | 73 | 74 |
| 75 | 78 | 80 |    | 76 | 79 | 82 |
| 75 | 79 | 80 |    | 76 | 80 | 83 |
| 76 | 80 | 80 |    | 77 | 80 | 83 |
| 75 | 80 | 79 |    | 78 | 81 | 83 |
| 75 | 82 | 79 |    | 78 | 80 | 83 |

|    |    |    |    |    |    |
|----|----|----|----|----|----|
| 76 | 82 | 79 | 79 | 76 | 80 |
| 76 | 78 | 79 | 79 | 75 | 80 |
| 76 | 76 | 79 | 79 | 73 | 83 |
| 75 | 74 | 79 | 79 | 73 | 84 |
| 75 | 73 | 79 | 79 | 73 | 84 |
| 75 | 72 | 80 | 79 | 73 | 76 |
| 74 | 73 | 80 | 78 | 74 | 74 |
| 74 | 73 | 80 |    | 74 | 74 |
| 74 | 73 | 79 |    | 74 | 73 |
| 74 | 73 | 79 |    | 75 | 84 |
| 74 | 73 | 79 |    | 73 | 83 |
| 74 | 74 | 78 |    | 73 | 83 |
| 74 | 74 | 78 |    | 72 | 84 |
| 74 | 74 | 77 |    | 75 | 81 |
| 74 | 74 | 76 |    | 73 | 73 |
| 74 | 74 | 76 |    | 73 | 83 |
| 73 | 74 | 76 |    | 73 | 84 |
| 72 | 74 | 76 |    | 73 | 84 |
| 72 | 75 | 79 |    | 73 | 84 |
| 72 | 76 | 79 |    | 73 | 84 |
| 74 | 76 | 79 |    | 73 | 84 |
| 77 | 76 | 79 |    | 75 | 84 |
| 78 | 76 | 79 |    | 76 | 79 |
| 77 | 76 | 79 |    | 74 | 73 |
| 76 | 76 | 78 |    | 73 | 73 |
| 74 | 76 | 77 |    | 73 | 72 |
| 74 | 75 | 77 |    | 74 | 75 |
| 73 | 74 | 77 |    | 74 | 72 |
| 73 | 74 | 77 |    | 74 | 73 |
| 71 | 74 | 77 |    | 74 | 74 |
| 70 | 75 | 78 |    | 74 | 75 |
| 70 | 76 | 78 |    | 74 | 75 |
| 70 | 76 | 78 |    | 74 | 75 |
| 70 | 76 | 79 |    | 74 | 75 |
| 73 | 76 | 79 |    | 74 | 75 |
| 73 | 76 | 79 |    | 73 | 76 |
| 74 | 77 | 80 |    | 73 | 76 |
| 74 | 77 | 81 |    | 73 | 76 |
| 74 | 77 | 80 |    | 73 | 75 |
| 73 | 77 | 80 |    | 73 | 75 |
| 73 | 76 | 80 |    | 73 | 75 |
| 73 | 76 | 79 |    | 73 | 72 |
| 72 | 76 | 78 |    | 73 | 80 |
| 72 | 76 | 78 |    | 73 | 81 |
| 71 | 77 | 79 |    | 75 | 82 |
| 70 | 77 | 79 |    | 76 | 82 |
| 70 | 77 | 78 |    | 76 | 83 |
| 70 | 77 | 77 |    | 76 | 83 |
| 70 | 77 | 77 |    | 75 | 76 |
| 71 | 77 | 78 |    | 75 | 76 |

|    |    |    |    |    |
|----|----|----|----|----|
| 71 | 78 | 78 | 75 | 76 |
| 71 | 78 | 77 | 74 | 76 |
| 72 | 77 | 77 | 74 | 76 |
| 72 | 76 | 77 | 73 | 82 |
| 73 | 76 | 77 | 73 | 79 |
| 74 | 76 | 77 | 73 | 81 |
| 74 | 75 | 77 | 74 | 81 |
| 74 | 75 | 77 | 73 | 81 |
| 74 | 75 | 77 | 73 | 82 |
| 75 | 75 | 78 | 73 | 82 |
| 75 | 75 | 78 | 73 | 82 |
| 76 | 75 | 78 | 73 | 79 |
| 76 | 75 | 78 | 74 | 73 |
| 76 | 75 | 78 | 79 | 74 |
| 76 | 75 | 78 | 79 | 75 |
| 73 | 75 | 77 | 82 | 74 |
| 71 | 75 | 77 | 82 | 74 |
| 71 | 75 | 76 | 74 | 73 |
| 72 | 76 | 75 | 74 | 75 |
| 74 | 76 | 74 | 73 | 79 |
| 74 | 76 | 75 | 73 | 79 |
| 75 | 76 | 75 | 74 | 72 |
| 75 | 76 | 75 | 74 | 72 |
| 76 | 76 | 75 | 74 | 72 |
| 76 | 76 | 75 | 74 | 73 |
| 76 | 76 | 75 | 74 | 73 |
| 76 | 76 | 80 | 75 | 73 |
| 75 | 75 | 83 | 76 | 73 |
| 75 | 75 | 84 | 76 | 74 |
| 75 | 75 | 84 | 76 | 74 |
| 75 | 75 | 84 | 76 | 73 |
| 75 | 74 | 84 | 76 | 73 |
| 75 | 74 | 84 | 76 | 79 |
| 75 | 74 | 84 | 76 | 80 |
| 75 | 74 | 84 | 76 | 81 |
| 75 | 73 | 83 | 76 | 81 |
| 75 | 73 | 83 | 76 | 79 |
| 74 | 73 | 83 | 75 | 73 |
| 71 | 73 | 82 | 75 | 74 |
| 70 | 73 | 73 | 74 | 79 |
| 69 | 73 | 69 | 73 | 81 |
| 68 | 74 | 69 | 73 | 81 |
| 68 | 74 | 71 | 74 | 81 |
| 67 | 75 | 74 | 76 | 81 |
| 67 | 75 | 77 | 76 | 79 |
| 66 | 76 | 81 | 76 | 85 |
| 66 | 77 | 81 | 73 | 79 |
| 66 | 77 | 81 | 72 | 79 |
| 66 | 78 | 81 | 73 | 78 |
| 66 | 77 |    | 73 | 77 |

|    |    |    |    |
|----|----|----|----|
| 66 | 77 | 73 | 76 |
| 66 | 76 | 73 | 76 |
| 69 | 76 | 74 | 73 |
| 70 | 75 | 74 | 73 |
| 69 | 75 | 74 | 73 |
| 69 | 75 | 74 | 74 |
| 68 | 75 | 74 | 74 |
| 68 | 76 | 74 | 74 |
| 67 | 77 | 74 | 74 |
| 67 | 78 | 74 | 74 |
| 67 | 78 | 74 | 73 |
| 67 | 78 | 74 | 74 |
| 67 | 77 | 74 | 74 |
| 67 | 76 | 74 | 77 |
| 67 | 76 | 74 | 77 |
| 68 | 75 | 74 | 77 |
| 68 | 75 | 74 | 73 |
| 68 | 75 | 75 | 74 |
| 69 | 75 | 75 | 76 |
| 71 | 74 | 76 | 76 |
| 72 | 74 | 78 | 75 |
| 74 | 74 | 80 | 74 |
| 74 | 75 | 80 | 74 |
| 74 | 74 | 79 | 76 |
| 74 | 73 | 80 | 76 |
| 72 | 73 | 76 | 77 |
| 71 | 73 | 75 | 79 |
| 70 | 72 | 75 | 81 |
| 70 | 73 | 75 | 81 |
| 70 | 74 | 74 | 81 |
| 70 | 74 | 74 | 81 |
| 70 | 75 | 73 | 78 |
| 70 | 77 | 73 | 78 |
| 70 | 78 | 73 | 78 |
| 71 | 80 | 73 | 79 |
| 72 | 81 | 74 | 76 |
| 73 | 81 | 74 | 75 |
| 73 | 80 | 75 | 76 |
| 73 | 79 | 76 | 76 |
| 73 | 78 | 80 | 76 |
| 74 | 78 | 80 | 73 |
| 74 | 78 | 80 | 73 |
| 74 | 78 | 76 | 74 |
| 72 | 77 | 76 | 74 |
| 72 | 76 | 76 | 75 |
| 72 | 76 | 80 | 78 |
| 71 | 76 | 82 | 78 |
| 69 | 77 | 82 | 77 |
| 69 | 77 | 80 | 76 |
| 67 | 77 | 82 | 75 |

|    |    |    |    |
|----|----|----|----|
| 66 | 77 | 80 | 74 |
| 66 | 77 | 81 | 74 |
| 66 | 77 | 81 | 74 |
| 70 | 77 | 81 | 73 |
| 72 | 78 | 81 | 74 |
| 72 | 77 | 82 | 74 |
| 72 | 77 | 82 | 74 |
| 72 | 77 | 81 | 74 |
| 75 | 77 | 82 | 77 |
| 76 | 76 | 76 | 76 |
| 76 | 76 | 76 | 76 |
| 75 | 76 | 75 | 76 |
| 72 | 76 | 74 | 76 |
| 71 | 76 | 76 | 76 |
| 70 | 77 | 73 | 76 |
| 70 | 76 | 73 | 76 |
| 71 | 73 | 76 | 76 |
| 71 | 72 | 76 | 77 |
| 72 | 71 | 75 | 77 |
| 73 | 70 | 76 | 77 |
| 74 | 69 | 76 | 77 |
| 76 | 69 | 76 | 77 |
| 76 | 69 | 72 | 77 |
| 77 | 69 | 74 | 77 |
| 77 | 68 | 73 | 77 |
| 76 | 68 | 74 | 75 |
| 76 | 65 | 76 | 77 |
| 76 | 64 | 76 | 77 |
| 76 | 64 | 73 | 77 |
| 76 | 63 | 73 | 77 |
| 76 | 59 | 73 | 77 |
| 76 | 59 | 73 | 77 |
| 75 | 58 | 73 | 77 |
| 73 | 58 | 76 | 77 |
| 72 | 55 | 75 | 77 |
| 72 | 55 | 73 | 76 |
| 72 | 60 | 74 | 76 |
| 72 | 61 | 74 | 76 |
| 72 | 62 | 73 | 76 |
| 75 | 63 | 72 | 76 |
| 76 | 64 | 74 | 76 |
| 76 | 64 | 72 | 76 |
| 76 | 68 | 74 | 76 |
| 75 | 69 | 74 | 72 |
| 75 | 69 | 74 | 73 |
| 75 | 69 | 73 | 73 |
| 75 | 70 | 73 | 73 |
| 75 | 73 | 75 | 73 |
| 73 | 72 | 75 | 73 |
| 71 | 71 | 75 | 73 |

|    |    |
|----|----|
| 71 | 70 |
| 71 | 70 |
| 71 | 69 |
| 71 | 69 |
| 71 | 68 |
| 70 | 68 |
| 69 | 68 |
| 69 | 67 |
| 69 | 66 |
| 69 | 66 |
| 69 | 66 |
| 69 | 66 |
| 69 | 66 |
| 70 | 66 |
| 71 | 66 |
| 73 | 66 |
| 74 | 66 |
| 75 | 66 |
| 75 | 66 |
| 76 | 67 |
| 77 | 67 |
| 77 | 67 |
| 77 | 67 |
| 77 | 68 |
| 78 | 68 |
| 78 | 68 |
| 77 | 68 |
| 77 | 68 |
| 78 | 68 |
| 78 | 68 |
| 78 | 68 |
| 78 | 68 |
| 77 | 68 |
| 76 | 69 |
| 75 | 74 |
| 75 | 80 |
| 74 | 81 |
| 74 | 81 |
| 74 | 81 |
| 73 | 81 |
| 72 | 82 |
| 71 | 82 |
| 70 | 81 |
| 70 | 82 |
| 70 | 81 |
| 70 | 81 |
| 70 | 81 |
| 71 | 79 |
| 72 | 79 |
| 74 | 77 |

|    |    |
|----|----|
| 81 | 73 |
| 74 | 74 |
| 73 | 75 |
| 73 | 75 |
| 73 | 74 |
| 73 | 75 |
| 73 | 75 |
| 74 | 75 |
| 73 | 76 |
| 74 | 75 |
| 74 | 75 |
| 74 | 76 |
| 76 | 76 |
| 76 | 76 |
| 76 | 75 |
| 76 | 75 |
| 76 | 74 |
| 76 | 74 |
| 76 | 74 |
| 76 | 74 |
| 76 | 74 |
| 81 | 74 |
| 79 | 74 |
| 79 | 74 |
| 79 | 74 |
| 80 | 74 |
| 82 | 73 |
| 82 | 72 |
| 82 | 72 |
| 82 | 72 |
| 79 | 74 |
| 75 | 77 |
| 81 | 78 |
| 81 | 77 |
| 76 | 76 |
| 76 | 74 |
| 76 | 74 |
| 76 | 73 |
| 76 | 73 |
| 76 | 76 |
| 76 | 76 |
| 76 | 76 |
| 76 | 76 |
| 80 | 73 |
| 80 | 73 |
| 80 | 74 |
| 76 | 74 |
| 76 | 74 |



|    |    |
|----|----|
| 75 | 75 |
| 75 | 74 |
| 75 | 74 |
| 75 | 74 |
| 74 | 73 |
| 74 | 73 |
| 74 | 72 |
| 75 | 66 |
| 75 | 66 |
| 75 | 67 |
| 75 | 67 |
| 75 | 68 |
| 74 | 68 |
| 74 | 68 |
| 74 | 68 |
| 75 | 68 |
| 74 | 71 |
| 74 | 75 |
| 74 | 76 |
| 74 | 76 |
| 79 | 76 |
| 81 | 76 |
| 81 | 76 |
| 79 | 75 |
| 77 | 76 |
| 75 | 75 |
| 73 | 75 |
| 73 | 70 |
| 72 | 70 |
| 72 | 69 |
| 73 | 69 |
| 74 | 68 |
| 74 | 68 |
| 74 | 68 |
| 75 | 68 |
| 74 | 68 |
| 74 | 73 |
| 75 | 72 |
| 75 | 70 |
| 74 | 67 |
| 74 | 66 |
| 74 | 65 |
| 74 | 65 |
| 73 | 65 |
| 73 | 65 |
| 73 | 65 |
| 74 | 66 |
| 74 | 66 |
| 74 | 66 |
| 74 | 66 |

|    |    |
|----|----|
| 75 | 73 |
| 76 | 73 |
| 73 | 73 |
| 76 | 74 |
| 72 | 74 |
| 80 | 76 |
| 76 | 76 |
| 79 | 77 |
| 76 | 77 |
| 76 | 77 |
| 81 | 77 |
| 81 | 77 |
| 81 | 77 |
| 81 | 74 |
| 81 | 74 |
| 81 | 73 |
| 82 | 74 |
| 72 | 74 |
| 76 | 74 |
| 82 | 74 |
| 82 | 75 |
| 80 | 75 |
| 76 | 76 |
| 80 | 76 |
| 80 | 76 |
| 73 | 76 |
| 72 | 73 |
| 76 | 77 |
| 76 | 77 |
| 75 | 74 |
| 76 | 74 |
| 76 | 74 |
| 76 | 75 |
| 76 | 75 |
| 75 | 76 |
| 80 | 76 |
| 79 | 76 |
| 79 | 76 |
| 81 | 75 |
| 81 | 75 |
| 76 | 75 |
| 76 | 75 |
| 75 | 75 |
| 73 | 75 |
| 82 | 75 |
| 82 | 75 |
| 82 | 75 |
| 82 | 75 |
| 82 | 74 |
| 82 | 77 |

|    |    |    |    |
|----|----|----|----|
| 74 | 67 | 82 | 77 |
| 74 | 67 | 82 | 79 |
| 74 | 68 | 76 | 79 |
| 74 | 68 | 72 | 80 |
| 75 | 70 | 73 | 80 |
| 75 | 70 | 73 | 80 |
| 75 | 70 | 73 | 80 |
| 75 | 70 | 73 | 80 |
| 75 | 70 | 72 | 79 |
| 75 | 71 | 76 | 78 |
| 75 | 70 | 76 | 78 |
| 75 | 69 | 76 | 78 |
| 74 | 69 | 76 | 78 |
| 74 | 68 | 76 | 79 |
| 74 | 68 | 76 | 79 |
| 74 | 68 | 76 | 79 |
| 74 | 68 | 76 | 79 |
| 74 | 68 | 76 | 79 |
| 73 | 74 | 76 | 81 |
| 73 | 77 | 72 | 81 |
| 73 | 77 | 73 | 81 |
| 73 | 76 | 73 | 81 |
| 73 | 76 | 73 | 81 |
| 73 | 76 | 73 | 81 |
| 73 | 74 | 73 | 81 |
| 73 | 73 | 73 | 79 |
| 74 | 72 | 73 |    |
| 74 | 72 | 73 |    |
| 74 | 72 | 73 |    |
| 74 | 71 | 73 |    |
| 75 | 71 | 74 |    |
| 75 | 71 | 75 |    |
| 74 | 71 | 79 |    |
| 74 | 69 | 76 |    |
| 74 | 69 | 76 |    |
| 73 | 67 | 79 |    |
| 72 | 67 | 81 |    |
| 71 | 63 | 76 |    |
| 70 | 61 | 75 |    |
| 69 | 61 | 81 |    |
| 69 | 60 | 81 |    |
| 69 | 60 | 81 |    |
| 69 | 60 | 82 |    |
| 69 | 59 | 82 |    |
| 69 | 59 | 81 |    |
| 70 | 62 | 75 |    |
| 70 | 63 | 74 |    |
| 70 | 67 | 73 |    |
| 69 | 67 | 73 |    |
| 68 | 67 | 73 |    |

|    |    |
|----|----|
| 67 | 67 |
| 66 | 67 |
| 65 | 68 |
| 68 | 69 |
| 68 | 70 |
| 68 | 70 |
| 68 | 70 |
| 69 | 70 |
| 69 | 71 |
| 71 | 71 |
| 71 | 71 |
| 71 | 71 |
| 70 | 71 |
| 70 | 71 |
| 69 | 71 |
| 69 | 72 |
| 69 | 73 |
| 69 | 74 |
| 69 | 74 |
| 69 | 74 |
| 69 | 74 |
| 69 | 71 |
| 70 | 71 |
| 70 | 71 |
| 68 | 71 |
| 68 | 70 |
| 65 | 70 |
| 64 | 70 |
| 64 | 72 |
| 64 | 75 |
| 63 | 76 |
| 64 | 76 |
| 64 | 77 |
| 67 | 77 |
| 68 | 77 |
| 68 | 77 |
| 68 | 77 |
| 68 | 77 |
| 68 | 77 |
| 68 |    |
| 68 |    |
| 68 |    |
| 68 |    |
| 68 |    |
| 66 |    |
| 66 |    |
| 72 |    |
| 72 |    |
| 73 |    |

73  
73  
73  
72  
72  
68  
67  
65  
65  
66  
66  
66  
66  
67  
67  
69  
70  
70  
70  
70  
69  
69  
68  
68











| eUsr#7<br>App3 | eUsr#8<br>App1 | eUsr#8<br>App2 | eUsr#8<br>App3 | eUsr#9<br>App1 | eUsr#9<br>App2 | eUsr#9<br>App3 |    |
|----------------|----------------|----------------|----------------|----------------|----------------|----------------|----|
|                | 79             | 89             | 76             | 83             | 76             | 69             | 74 |
|                | 79             | 89             | 76             | 83             | 76             | 70             | 73 |
|                | 79             | 90             | 76             | 84             | 75             | 72             | 73 |
|                | 79             | 91             | 76             | 84             | 74             | 73             | 73 |
|                | 79             | 91             | 77             | 83             | 74             | 73             | 74 |
|                | 74             | 91             | 77             | 83             | 75             | 73             | 74 |
|                | 74             | 91             | 78             | 82             | 75             | 72             | 75 |
|                | 74             | 91             | 81             | 82             | 76             | 72             | 75 |
|                | 74             | 91             | 85             | 81             | 76             | 73             | 76 |
|                | 74             | 90             | 86             | 77             | 76             | 73             | 76 |
|                | 74             | 90             | 87             | 76             | 76             | 73             | 76 |
|                | 79             | 90             | 87             | 76             | 76             | 73             | 75 |
|                | 79             | 90             | 87             | 75             | 76             | 73             | 74 |
|                | 80             | 90             | 87             | 75             | 77             | 73             | 73 |
|                | 80             | 90             | 89             | 75             | 77             | 73             | 73 |
|                | 80             | 89             | 91             | 75             | 77             | 73             | 73 |
|                | 80             | 88             | 91             | 75             | 76             | 72             | 73 |
|                | 80             | 88             | 91             | 75             | 76             | 72             | 74 |
|                | 80             | 87             | 92             | 74             | 76             | 72             | 74 |
|                | 79             | 86             | 92             | 74             | 76             | 72             | 74 |
|                | 74             | 86             | 93             | 74             | 76             | 72             | 74 |
|                | 73             | 86             | 94             | 74             | 76             | 72             | 74 |
|                | 73             | 85             | 94             | 74             | 76             | 72             | 74 |
|                | 73             | 85             | 94             | 76             | 76             | 72             | 75 |
|                | 73             | 86             | 94             | 78             | 76             | 68             | 76 |
|                | 74             | 86             | 92             | 79             | 77             | 66             | 76 |
|                | 74             | 86             | 91             | 79             | 77             | 66             | 76 |
|                | 74             | 86             | 91             | 79             | 77             | 65             | 76 |
|                | 74             | 86             | 91             | 79             | 77             | 65             | 76 |
|                | 76             | 86             | 91             | 79             | 77             | 65             | 76 |
|                | 74             | 86             | 91             | 79             | 78             | 66             | 76 |
|                | 79             | 86             | 96             | 79             | 79             | 68             | 76 |
|                | 81             | 87             | 96             | 79             | 78             | 68             | 75 |
|                | 81             | 88             | 96             | 79             | 78             | 68             | 75 |
|                | 80             | 88             | 98             | 80             | 78             | 68             | 74 |
|                | 78             | 89             | 98             | 80             | 77             | 68             | 75 |
|                | 78             | 89             | 99             | 80             | 77             | 65             | 79 |
|                | 78             | 92             | 101            | 80             | 76             | 64             | 80 |
|                | 77             | 93             | 103            | 80             | 77             | 64             | 79 |
|                | 75             | 94             | 104            | 80             | 77             | 64             | 79 |
|                | 76             | 94             | 104            | 80             | 77             | 64             | 79 |
|                | 77             | 94             | 104            | 80             | 77             | 64             | 81 |
|                | 75             | 97             | 104            | 82             | 76             | 65             | 81 |
|                | 75             | 98             | 103            | 83             | 76             | 65             | 81 |
|                | 76             | 98             | 103            | 83             | 76             | 66             | 83 |
|                | 76             | 98             | 101            | 84             | 76             | 67             | 79 |
|                | 75             | 98             | 100            | 84             | 76             | 69             | 79 |
|                | 74             | 98             | 99             | 85             | 76             | 74             | 79 |

|    |     |     |    |    |    |    |
|----|-----|-----|----|----|----|----|
| 77 | 98  | 99  | 86 | 75 | 75 | 79 |
| 77 | 98  | 98  | 87 | 75 | 75 | 78 |
| 77 | 98  | 97  | 88 | 75 | 74 | 81 |
| 77 | 98  | 97  | 88 | 75 | 74 | 81 |
| 77 | 98  | 97  | 88 | 75 | 74 | 77 |
| 74 | 98  | 97  | 88 | 75 | 74 | 77 |
| 73 | 99  | 99  | 90 | 75 | 74 | 76 |
| 74 | 99  | 100 | 90 | 74 | 73 | 76 |
| 76 | 100 | 101 | 90 | 77 | 73 | 77 |
| 76 | 102 | 101 | 90 | 77 | 75 | 76 |
| 77 | 102 | 102 | 91 | 77 | 75 | 76 |
| 77 | 102 | 103 | 92 | 76 | 75 | 76 |
| 76 | 102 | 104 | 92 | 75 | 75 | 76 |
| 76 | 103 | 104 | 92 | 75 | 75 | 76 |
| 76 | 104 | 104 | 92 | 74 | 75 | 75 |
| 76 | 106 | 103 | 92 | 73 | 75 | 76 |
| 76 | 107 | 102 | 92 | 72 | 73 | 75 |
| 76 | 107 | 101 | 93 | 72 | 72 | 74 |
| 76 | 107 | 100 | 93 | 72 | 72 | 74 |
| 75 | 107 | 93  | 93 | 71 | 73 | 73 |
| 73 | 107 | 91  | 93 | 70 | 74 | 73 |
| 74 | 108 | 91  | 90 | 69 | 74 | 73 |
| 77 | 108 | 91  | 89 | 68 | 74 | 74 |
| 77 | 108 | 90  | 87 | 68 | 74 | 74 |
| 77 | 107 | 89  | 83 | 68 | 75 | 75 |
| 75 | 106 | 88  | 82 | 68 | 75 | 75 |
| 75 | 106 | 88  | 81 | 68 | 75 | 74 |
| 76 | 105 | 87  | 81 | 67 | 74 | 74 |
| 76 | 104 | 86  | 81 | 71 | 74 | 74 |
| 76 | 103 | 86  | 81 | 73 | 75 | 74 |
| 75 | 103 | 86  | 81 | 74 | 75 | 75 |
| 75 | 103 | 83  | 81 | 74 | 75 | 76 |
| 75 | 102 | 82  | 81 | 74 | 76 | 76 |
| 75 | 100 | 82  | 81 | 74 | 76 | 77 |
| 75 | 100 | 82  | 81 | 74 | 76 | 77 |
| 73 | 100 | 82  | 81 | 74 | 75 | 77 |
| 77 | 101 | 82  | 81 | 74 | 74 | 77 |
| 77 | 101 | 82  | 81 | 74 | 73 | 77 |
| 77 | 101 | 81  | 81 | 74 | 74 | 77 |
| 77 | 102 | 81  | 80 | 74 | 74 | 77 |
| 77 | 103 | 80  | 79 | 74 | 75 | 78 |
| 77 | 103 | 80  | 79 | 74 | 74 | 78 |
| 77 | 103 | 79  | 79 | 73 | 74 | 79 |
| 77 | 103 | 79  | 78 | 73 | 73 | 79 |
| 80 | 103 | 79  | 78 | 73 | 73 | 75 |
| 80 | 102 | 79  | 78 | 74 | 72 | 75 |
| 80 | 101 | 80  | 78 | 74 | 72 | 79 |
| 80 | 101 | 80  | 77 | 75 | 71 | 79 |
| 81 | 102 | 82  | 77 | 75 | 72 | 79 |
| 81 | 103 | 83  | 76 | 75 | 73 | 79 |

|    |     |    |    |    |    |    |
|----|-----|----|----|----|----|----|
| 81 | 103 | 84 | 76 | 75 | 73 | 74 |
| 79 | 103 | 84 | 76 | 76 | 74 | 74 |
| 73 | 104 | 84 | 76 | 76 | 74 | 74 |
| 74 | 105 | 85 | 76 | 76 | 73 | 75 |
| 75 | 107 | 84 | 76 | 76 | 73 | 75 |
| 75 | 108 | 84 | 76 | 76 | 72 | 73 |
| 76 | 108 | 84 | 76 | 77 | 72 | 75 |
| 77 | 108 | 84 | 77 | 77 | 72 | 76 |
| 77 | 108 | 84 | 78 | 77 | 71 | 76 |
| 77 | 108 | 83 | 77 | 78 | 68 | 76 |
| 77 | 108 | 83 | 77 | 78 | 66 | 77 |
| 78 | 108 | 83 | 75 | 77 | 65 | 77 |
| 78 | 108 | 83 | 75 | 77 | 64 | 75 |
| 77 | 103 | 83 | 75 | 77 | 64 | 75 |
| 77 | 98  | 84 | 74 | 76 | 63 |    |
| 78 | 97  | 84 | 74 | 76 | 62 |    |
| 78 | 97  | 84 | 73 | 78 | 60 |    |
| 78 | 97  | 84 | 72 | 79 | 60 |    |
| 78 | 94  | 86 | 70 | 79 | 60 |    |
| 77 | 94  | 86 | 70 | 79 | 62 |    |
| 76 | 92  | 86 | 70 | 78 | 66 |    |
| 75 | 91  | 86 | 70 | 78 | 70 |    |
| 75 | 89  | 86 | 69 | 79 | 72 |    |
| 74 | 87  | 86 | 69 | 79 | 73 |    |
| 74 | 85  | 86 | 68 | 80 | 73 |    |
| 74 | 84  | 86 | 69 | 80 | 73 |    |
| 73 | 84  | 86 | 69 | 80 | 73 |    |
| 74 | 84  | 87 | 69 | 79 | 73 |    |
| 79 | 84  | 87 | 69 | 79 | 73 |    |
| 76 | 83  | 87 | 70 | 79 | 73 |    |
| 77 | 86  | 87 | 70 | 79 | 73 |    |
| 79 | 86  | 85 | 70 | 79 | 74 |    |
| 79 | 87  | 84 | 70 | 79 | 74 |    |
| 78 | 89  | 83 | 70 | 78 | 74 |    |
| 77 | 92  | 84 | 70 | 78 | 74 |    |
| 75 | 93  | 86 | 70 | 78 | 74 |    |
| 74 | 93  | 88 | 70 | 78 | 74 |    |
| 75 | 91  | 88 | 71 | 73 | 74 |    |
| 75 | 90  | 89 | 71 | 73 | 74 |    |
| 75 | 89  | 90 | 72 | 73 | 73 |    |
| 75 | 88  | 90 | 73 | 73 | 73 |    |
| 74 | 88  | 91 | 75 | 73 | 73 |    |
| 74 | 87  | 92 | 76 | 73 | 73 |    |
| 74 | 87  | 92 | 76 | 74 | 73 |    |
| 75 | 85  | 93 | 76 | 74 | 73 |    |
| 75 | 85  | 93 | 76 | 74 | 72 |    |
| 75 | 86  | 94 | 76 | 74 | 71 |    |
| 75 | 86  | 94 | 74 | 74 | 70 |    |
| 75 | 86  | 95 | 74 | 74 | 70 |    |
| 74 | 86  | 95 | 74 | 74 | 70 |    |

|    |    |    |    |    |    |
|----|----|----|----|----|----|
| 74 | 87 | 95 | 73 | 75 | 73 |
| 74 | 88 | 96 | 73 | 74 | 75 |
| 75 | 89 | 96 | 73 | 74 | 74 |
| 74 | 90 | 97 | 73 | 74 | 73 |
| 74 | 90 | 96 | 73 | 74 | 72 |
| 74 | 90 | 96 | 73 | 75 | 71 |
| 74 | 89 | 96 | 73 | 75 | 72 |
| 79 | 89 | 96 | 73 | 75 | 71 |
| 80 | 89 | 96 | 71 | 76 | 71 |
| 80 | 90 | 96 | 71 | 76 | 72 |
| 79 | 90 | 96 | 71 | 76 | 73 |
| 77 | 90 | 95 | 68 | 76 | 73 |
| 75 | 90 | 95 | 67 | 76 | 72 |
| 73 | 93 | 96 | 67 | 76 | 71 |
| 73 | 92 | 96 | 69 | 76 | 71 |
| 74 | 92 | 96 | 72 | 75 | 71 |
| 75 | 92 | 96 | 73 | 75 | 72 |
| 73 | 92 | 96 | 73 | 74 | 71 |
| 74 | 92 | 97 | 74 | 75 | 71 |
| 74 | 92 | 98 | 74 | 76 | 72 |
| 74 | 92 | 98 | 74 | 76 | 72 |
| 75 | 92 | 97 | 75 | 76 | 72 |
| 74 | 92 | 96 | 75 | 76 | 73 |
| 74 | 92 | 96 | 76 | 75 | 73 |
| 75 | 92 | 96 | 76 | 75 | 73 |
| 75 | 92 | 94 | 76 | 75 | 73 |
| 74 | 91 | 94 | 76 | 75 | 73 |
| 74 | 91 | 90 | 76 | 75 | 72 |
| 74 | 91 | 90 | 77 | 76 | 72 |
| 74 | 91 | 89 | 77 | 76 | 72 |
| 73 | 92 | 89 | 77 | 76 | 72 |
| 73 | 91 | 89 | 78 | 76 | 71 |
| 73 | 91 | 89 | 78 | 75 | 71 |
| 74 | 91 |    | 78 | 75 | 70 |
| 74 | 91 |    | 78 | 74 | 70 |
| 74 | 91 |    | 78 | 73 | 70 |
| 74 | 91 |    | 79 | 72 | 69 |
| 74 | 92 |    | 80 | 72 | 70 |
| 74 | 98 |    | 80 | 72 | 70 |
| 74 | 99 |    | 79 | 73 |    |
| 74 | 99 |    | 79 | 74 |    |
| 75 | 99 |    | 79 | 74 |    |
| 75 | 99 |    | 81 | 74 |    |
| 75 | 99 |    | 81 | 74 |    |
| 75 | 98 |    | 81 | 74 |    |
| 75 | 97 |    | 81 | 74 |    |
| 75 | 96 |    | 81 | 74 |    |
| 75 | 94 |    | 82 | 74 |    |
| 75 | 94 |    | 83 | 74 |    |
| 74 | 94 |    | 83 | 73 |    |

|    |    |    |    |
|----|----|----|----|
| 74 | 92 | 84 | 73 |
| 74 | 89 | 86 | 72 |
| 74 | 89 | 88 | 71 |
| 74 | 88 | 92 | 71 |
| 74 | 88 | 92 | 70 |
| 73 | 88 | 94 | 70 |
| 73 | 89 | 94 | 70 |
| 73 | 89 | 93 | 70 |
| 73 | 89 | 93 | 70 |
| 73 | 88 | 92 | 72 |
| 73 | 88 | 91 | 73 |
| 73 | 90 | 91 | 73 |
| 73 | 91 | 91 | 73 |
| 74 | 92 | 91 | 72 |
| 74 | 92 | 92 | 70 |
| 74 | 92 | 92 | 70 |
| 74 | 92 | 92 | 69 |
| 75 | 92 | 92 | 70 |
| 75 | 92 | 92 | 70 |
| 74 | 90 | 92 | 71 |
| 74 | 90 | 90 | 72 |
| 74 | 88 | 89 | 72 |
| 73 | 87 | 89 | 72 |
| 75 | 87 | 89 | 72 |
| 77 | 87 | 88 | 72 |
| 77 | 87 | 86 | 71 |
| 80 | 87 | 81 | 71 |
| 80 | 87 | 79 | 71 |
| 80 | 85 | 79 | 71 |
| 80 | 84 | 79 | 71 |
| 80 | 84 | 78 | 70 |
| 79 | 84 | 78 | 70 |
| 79 | 84 |    | 69 |
| 79 | 84 |    | 69 |
| 79 | 84 |    | 69 |
| 81 | 84 |    | 68 |
| 81 | 84 |    | 68 |
| 81 | 84 |    | 73 |
| 81 | 84 |    | 73 |
| 81 | 86 |    | 73 |
| 81 | 86 |    | 74 |
| 79 | 89 |    | 74 |
| 79 | 89 |    | 75 |
| 79 | 90 |    | 75 |
| 79 | 92 |    | 75 |
| 79 | 96 |    | 75 |
| 78 | 97 |    | 75 |
| 78 | 97 |    | 75 |
| 78 | 97 |    | 75 |
| 78 | 97 |    | 75 |

|    |     |    |
|----|-----|----|
| 78 | 97  | 75 |
| 78 | 97  | 75 |
| 78 | 96  | 75 |
| 79 | 96  | 75 |
| 79 | 96  | 76 |
| 79 | 96  | 77 |
| 79 | 95  | 78 |
| 79 | 95  | 78 |
| 78 | 95  | 78 |
| 80 | 95  | 79 |
| 80 | 95  | 78 |
| 80 | 94  | 78 |
| 80 | 94  | 78 |
| 75 | 94  | 78 |
| 76 | 94  | 78 |
| 76 | 95  | 77 |
| 77 | 95  | 77 |
| 60 | 96  | 77 |
| 77 | 98  | 77 |
| 77 | 99  | 77 |
| 78 | 100 | 76 |
| 79 | 101 | 77 |
| 77 | 102 | 79 |
| 77 | 102 | 80 |
| 77 | 102 | 80 |
| 77 | 103 | 76 |
| 77 | 102 | 76 |
| 78 | 102 | 76 |
| 78 | 102 | 76 |
| 78 | 101 | 76 |
| 76 | 100 | 76 |
| 76 | 99  | 79 |
| 76 | 98  | 78 |
| 76 | 98  | 78 |
| 75 | 98  | 78 |
| 75 | 99  | 78 |
| 73 | 100 | 78 |
| 73 | 100 | 78 |
| 73 | 102 | 78 |
| 73 | 102 | 78 |
| 75 | 102 | 76 |
| 75 | 103 | 76 |
| 76 | 103 | 77 |
| 77 | 104 | 76 |
| 75 | 104 | 76 |
| 75 | 104 | 77 |
| 76 | 104 | 77 |
| 76 | 104 | 76 |
| 76 | 104 | 75 |
| 76 | 105 | 75 |

|    |     |    |
|----|-----|----|
| 77 | 105 | 75 |
| 77 | 105 | 75 |
| 77 | 105 | 75 |
| 75 | 105 | 76 |
| 75 | 104 | 75 |
| 75 | 104 | 75 |
| 76 | 104 | 75 |
| 79 | 102 | 75 |
| 79 | 101 | 76 |
| 78 | 101 | 76 |
| 78 | 100 | 76 |
| 78 | 100 | 76 |
| 76 | 99  | 76 |
| 76 | 99  | 76 |
| 76 | 99  | 76 |
| 76 | 98  | 76 |
| 78 | 98  | 75 |
| 78 | 97  | 75 |
| 76 | 94  | 75 |
| 73 | 93  | 75 |
| 73 | 93  | 75 |
|    | 94  | 74 |
|    | 94  | 74 |
|    | 94  | 75 |
|    | 94  | 75 |
|    | 94  | 75 |
|    | 94  | 75 |
|    | 95  | 75 |
|    | 95  | 75 |
|    | 96  | 75 |
|    | 96  | 75 |
|    | 97  | 76 |
|    | 100 | 76 |
|    | 100 | 75 |
|    | 104 | 74 |
|    | 105 | 75 |
|    | 107 | 74 |
|    | 108 | 74 |
|    | 108 | 74 |
|    | 108 | 74 |
|    | 107 | 74 |
|    | 107 | 74 |
|    | 107 | 74 |
|    | 104 |    |
|    | 104 |    |
|    | 104 |    |
|    | 103 |    |
|    | 103 |    |
|    | 103 |    |
|    | 103 |    |

103  
103  
103  
100  
98  
95  
95  
95  
95  
95  
94  
90  
88  
88  
88  
87  
87  
86  
86  
86  
86  
87  
87  
88  
88  
88  
88  
88  
87  
86  
86  
85  
84  
84  
84  
82  
82  
81  
81  
81  
81  
82  
82  
83  
83  
84  
84  
84  
83  
83



83  
83  
84  
84  
84  
86  
86  
87  
88  
89  
89  
89  
89  
88  
83  
80  
80  
79  
78  
78  
78  
78  
78  
78  
79  
79  
79  
79  
79  
80  
80  
80  
80  
81  
82  
82  
82  
82  
83  
83  
83  
83  
83  
82  
82  
82  
82  
82  
80  
82  
82

82  
82  
82  
82  
82  
82  
83  
83  
83  
85  
87  
88  
88  
88  
89  
90  
90  
89  
90  
90  
90  
89  
90  
90  
90  
90  
90  
91  
91  
90  
90  
90  
90















| eUsr#10<br>App1 | eUsr#10<br>App2 | eUsr#10<br>App3 |    |
|-----------------|-----------------|-----------------|----|
|                 | 79              | 76              | 69 |
|                 | 79              | 76              | 69 |
|                 | 79              | 76              | 69 |
|                 | 79              | 77              | 70 |
|                 | 79              | 77              | 70 |
|                 | 77              | 78              | 70 |
|                 | 77              | 79              | 65 |
|                 | 77              | 79              | 71 |
|                 | 77              | 75              | 70 |
|                 | 77              | 77              | 72 |
|                 | 77              | 77              | 72 |
|                 | 78              | 77              | 72 |
|                 | 78              | 77              | 72 |
|                 | 78              | 77              | 69 |
|                 | 77              | 80              | 69 |
|                 | 76              | 79              | 70 |
|                 | 72              | 79              | 71 |
|                 | 72              | 80              | 71 |
|                 | 80              | 79              | 71 |
|                 | 81              | 79              | 70 |
|                 | 75              | 80              | 70 |
|                 | 75              | 80              | 70 |
|                 | 75              | 80              | 70 |
|                 | 75              | 80              | 76 |
|                 | 76              | 78              | 78 |
|                 | 76              | 77              | 77 |
|                 | 76              | 77              | 75 |
|                 | 76              | 77              | 75 |
|                 | 76              | 77              | 75 |
|                 | 76              | 77              | 75 |
|                 | 77              | 79              | 75 |
|                 | 77              | 79              | 75 |
|                 | 77              | 79              | 75 |
|                 | 80              | 79              | 79 |
|                 | 80              | 79              | 75 |
|                 | 81              | 79              | 75 |
|                 | 81              | 81              | 75 |
|                 | 81              | 81              | 75 |
|                 | 82              | 81              | 80 |
|                 | 82              | 81              | 80 |
|                 | 82              | 81              | 80 |
|                 | 82              | 81              | 77 |
|                 | 82              | 81              | 77 |
|                 | 82              | 81              | 77 |
|                 | 82              | 81              | 77 |
|                 | 82              | 81              | 84 |
|                 | 82              | 81              | 83 |
|                 | 82              | 81              | 85 |

|    |    |    |
|----|----|----|
| 82 | 79 | 76 |
| 82 | 77 | 77 |
| 82 | 77 | 78 |
| 82 | 77 | 77 |
| 83 | 77 | 77 |
| 83 | 77 | 77 |
| 83 | 80 | 80 |
| 83 | 81 | 80 |
| 83 | 81 | 80 |
| 83 | 82 | 80 |
| 83 | 82 | 81 |
| 83 | 82 | 81 |
| 84 | 82 | 81 |
| 80 | 82 | 81 |
| 80 | 82 | 81 |
| 76 | 82 | 81 |
| 76 | 82 | 81 |
| 76 | 82 | 82 |
| 76 | 79 | 82 |
| 76 | 77 | 82 |
| 80 | 77 | 82 |
| 82 | 77 | 82 |
| 84 | 77 | 79 |
| 82 | 76 | 77 |
| 82 | 78 | 83 |
| 82 | 76 | 82 |
| 82 | 76 | 81 |
| 82 | 76 | 81 |
| 84 | 76 | 81 |
| 81 | 76 | 81 |
| 81 | 81 | 81 |
| 81 | 81 | 81 |
| 81 | 81 | 81 |
| 81 | 79 | 81 |
| 81 | 79 | 81 |
| 82 | 80 | 81 |
| 81 | 80 | 81 |
| 81 | 80 | 81 |
| 81 | 80 | 81 |
| 81 | 79 | 80 |
| 81 | 79 | 79 |
| 81 | 78 | 79 |
| 81 | 79 | 79 |
| 81 | 79 | 78 |
| 81 | 79 | 78 |
| 81 | 80 | 78 |
| 81 | 80 | 78 |
| 81 | 81 | 77 |
| 81 | 81 | 77 |
| 81 | 82 | 76 |

|    |    |    |
|----|----|----|
| 81 | 82 | 76 |
| 82 | 79 | 76 |
| 82 | 79 | 76 |
| 82 | 75 | 76 |
| 82 | 75 | 76 |
| 82 | 75 | 76 |
| 82 | 75 | 76 |
| 82 | 79 | 77 |
| 82 | 79 | 78 |
| 82 | 80 | 77 |
| 78 | 80 | 77 |
| 76 | 80 | 75 |
| 76 | 79 | 75 |
| 74 | 79 | 75 |
| 73 | 80 | 78 |
| 73 | 80 | 77 |
| 73 | 79 | 73 |
| 73 | 75 | 72 |
| 73 | 75 | 70 |
| 73 | 75 | 70 |
| 80 | 75 | 70 |
| 74 | 75 | 70 |
| 80 | 75 | 69 |
| 74 | 75 | 69 |
| 80 | 75 | 60 |
| 80 | 75 | 69 |
| 73 | 76 | 69 |
| 73 | 76 | 69 |
| 75 | 76 | 69 |
| 75 | 76 | 70 |
| 75 | 80 | 70 |
| 75 | 80 | 70 |
| 75 | 79 | 70 |
| 75 | 79 | 70 |
| 75 | 76 | 70 |
| 75 | 76 | 70 |
| 75 | 76 | 70 |
| 74 | 75 | 71 |
| 74 | 75 | 71 |
| 74 | 75 | 72 |
| 80 | 76 | 73 |
| 80 | 76 | 75 |
| 75 | 76 | 76 |
| 74 | 76 | 76 |
| 74 | 75 | 76 |
| 74 | 75 | 76 |
| 75 | 75 | 76 |
| 75 | 75 | 74 |
| 75 | 76 | 74 |
| 74 | 76 | 74 |

|    |    |    |
|----|----|----|
| 74 | 76 | 73 |
| 74 | 75 | 73 |
| 75 | 75 | 73 |
| 75 | 75 | 73 |
| 75 | 75 | 73 |
| 70 | 75 | 73 |
| 70 | 80 | 73 |
| 70 | 80 | 73 |
| 70 | 80 | 71 |
| 70 | 80 | 70 |
| 70 | 80 | 71 |
| 70 | 80 | 59 |
| 70 | 80 | 57 |
| 70 | 80 | 59 |
| 70 | 80 | 69 |
| 70 | 80 | 65 |
| 70 | 80 | 65 |
| 70 | 80 | 65 |
| 70 | 81 | 65 |
| 70 | 81 | 60 |
| 70 | 81 | 60 |
| 70 | 81 | 70 |
| 70 | 81 | 70 |
| 70 | 81 | 70 |
| 70 | 79 | 70 |
| 70 | 79 | 69 |
| 70 | 79 | 69 |
| 70 | 79 | 69 |
| 70 | 79 | 69 |
| 69 | 78 | 70 |
| 69 | 78 | 71 |
| 69 | 78 | 71 |
| 69 | 78 | 71 |
| 69 | 78 | 69 |
| 76 | 78 | 69 |
| 76 | 79 | 70 |
| 74 |    | 70 |
| 74 |    | 72 |
| 73 |    | 70 |
| 75 |    | 75 |
| 75 |    | 75 |
| 74 |    | 75 |
| 74 |    | 77 |
| 70 |    | 79 |
| 70 |    | 79 |
| 70 |    | 79 |
| 70 |    | 80 |
| 60 |    | 80 |
| 67 |    | 80 |
| 65 |    | 80 |

|    |    |
|----|----|
| 68 | 80 |
| 68 | 76 |
| 68 | 77 |
| 60 | 77 |
| 60 | 75 |
| 57 | 75 |
| 60 | 80 |
| 76 | 79 |
| 74 | 79 |
| 74 | 79 |
| 74 | 79 |
| 74 | 80 |
| 72 | 80 |
| 72 | 80 |
| 72 | 81 |
| 74 | 81 |
| 74 | 81 |
| 75 | 81 |
| 65 | 81 |
| 60 | 81 |
| 60 | 81 |
| 60 | 77 |
| 65 | 77 |
| 65 | 77 |
| 69 | 75 |
| 80 | 75 |
| 79 | 81 |
| 79 | 79 |
| 79 | 79 |
| 75 | 79 |
| 75 | 78 |
| 75 | 78 |
| 74 | 76 |
| 74 |    |
| 70 |    |
| 62 |    |
| 62 |    |
| 60 |    |
| 65 |    |
| 68 |    |
| 68 |    |
| 69 |    |
| 69 |    |
| 74 |    |
| 74 |    |
| 74 |    |
| 69 |    |
| 69 |    |
| 69 |    |
| 74 |    |

70  
70  
74  
65  
65  
65  
69  
69  
69  
65  
65  
69  
69  
73  
74  
76  
79  
79  
79  
79  
75  
75  
75  
70  
70  
70  
70  
73  
73  
73  
73  
73  
73  
75  
75  
70  
70  
75  
70  
70  
75  
70  
73  
73  
75  
73  
73  
73  
75  
75

75  
70  
70  
70  
70  
72  
72  
72  
75  
75  
75  
75  
75  
77  
74  
73  
73  
73  
73  
73  
73  
73  
73  
73  
73  
73  
73  
75  
75  
77  
78  
78  
77  
75  
75  
75  
75  
77  
77  
77  
77  
75  
75  
75  
77  
75  
77  
75  
75  
75  
79  
80  
79

79  
75  
75  
73  
73  
73  
73  
73  
65  
65  
65  
65  
65  
62  
62  
62  
63  
65  
65  
68  
60  
60  
65  
65  
60  
63  
61  
75  
77  
77  
77  
75  
75  
75  
75  
77  
77  
77  
77  
77  
76  
76  
76  
75  
75  
77  
77  
77  
75  
75



75  
70  
65  
63  
60  
60  
68  
60  
65  
60  
75  
70  
70  
75  
73  
73  
73  
73  
73  
73  
75  
75  
75  
75  
75  
70  
70  
70  
70  
70  
70  
73  
73  
73  
74  
76  
76  
76  
75  
75  
73  
73  
73  
75  
75  
75  
75  
70  
70  
70  
70

73  
73  
73  
73  
73  
70  
60  
65  
60  
68  
65  
70  
70  
60  
70  
60  
70  
65  
70  
70  
70  
70  
70  
68  
60  
65  
60  
60
