# Supplementary material for: Examining Potential of Scents for Enhancement of User Performance with Mobile Apps
Source: Hindawi journal article supplement (doi:10.1155/2022/8776994), 2022-03-16
Supplement: f1 [file 8776994.f1.zip]

Archive with 8 entries (8 files):
- 8776994.f1/raw_dataset_hr-controlgroup.pdf
- 8776994.f1/raw_dataset_hr-experimentalgroup.pdf
- 8776994.f1/raw_dataset_tasks-app1-controlgroup.pdf
- 8776994.f1/raw_dataset_tasks-app1-experimentalgroup.pdf
- 8776994.f1/raw_dataset_tasks-app2-controlgroup.pdf
- 8776994.f1/raw_dataset_tasks-app2-experimentalgroup.pdf
- 8776994.f1/raw_dataset_tasks-app3-controlgroup.pdf
- 8776994.f1/raw_dataset_tasks-app3-experimentalgroup.pdf
