# Supplementary material for: Examining Potential of Scents for Enhancement of User Performance with Mobile Apps
Source: Hindawi journal article supplement (doi:10.1155/2022/8776994), 2022-03-16
Supplement: f1 [file 8776994.f1.zip]

| User    | Task | Time (s) | KLM | Errors |
|---------|------|----------|-----|--------|
| eusr#1  | T1   | 0:16     | 6   | 0      |
| eusr#1  | T2   | 0:23     | 4   | 0      |
| eusr#1  | T3   | 0:33     | 6   | 0      |
| eusr#1  | T4   | 1:06     | 18  | 1      |
| eusr#1  | T5   | 0:27     | 9   | 1      |
| eusr#2  | T1   | 0:10     | 4   | 0      |
| eusr#2  | T2   | 0:11     | 4   | 0      |
| eusr#2  | T3   | 0:23     | 5   | 0      |
| eusr#2  | T4   | 0:50     | 14  | 3      |
| eusr#2  | T5   | 0:11     | 4   | 0      |
| eusr#3  | T1   | 0:41     | 8   | 0      |
| eusr#3  | T2   | 0:31     | 4   | 0      |
| eusr#3  | T3   | 0:28     | 7   | 0      |
| eusr#3  | T4   | 1:12     | 14  | 2      |
| eusr#3  | T5   | 0:17     | 10  | 0      |
| eusr#4  | T1   | 0:27     | 6   | 0      |
| eusr#4  | T2   | 0:17     | 4   | 0      |
| eusr#4  | T3   | 0:50     | 13  | 4      |
| eusr#4  | T4   | 1:11     | 21  | 0      |
| eusr#4  | T5   | 0:37     | 9   | 1      |
| eusr#5  | T1   | 0:24     | 4   | 0      |
| eusr#5  | T2   | 0:17     | 4   | 0      |
| eusr#5  | T3   | 1:21     | 11  | 0      |
| eusr#5  | T4   | 1:50     | 19  | 1      |
| eusr#5  | T5   | 0:09     | 3   | 0      |
| eusr#6  | T1   | 0:10     | 5   | 0      |
| eusr#6  | T2   | 0:15     | 6   | 0      |
| eusr#6  | T3   | 0:20     | 6   | 0      |
| eusr#6  | T4   | 0:26     | 10  | 1      |
| eusr#6  | T5   | 0:09     | 3   | 0      |
| eusr#7  | T1   | 0:20     | 4   | 0      |
| eusr#7  | T2   | 0:17     | 4   | 0      |
| eusr#7  | T3   | 0:29     | 5   | 0      |
| eusr#7  | T4   | 2:38     | 45  | 2      |
| eusr#7  | T5   | 0:12     | 3   | 0      |
| eusr#8  | T1   | 0:30     | 4   | 0      |
| eusr#8  | T2   | 0:32     | 4   | 0      |
| eusr#8  | T3   | 0:53     | 5   | 0      |
| eusr#8  | T4   | 0:25     | 5   | 0      |
| eusr#8  | T5   | 0:13     | 3   | 0      |
| eusr#9  | T1   | 0:10     | 6   | 0      |
| eusr#9  | T2   | 0:08     | 4   | 0      |
| eusr#9  | T3   | 0:15     | 5   | 0      |
| eusr#9  | T4   | 0:05     | 5   | 0      |
| eusr#9  | T5   | 0:05     | 3   | 0      |
| eusr#10 | T1   | 0:15     | 6   | 0      |
| eusr#10 | T2   | 0:08     | 5   | 0      |
| eusr#10 | T3   | 0:08     | 5   | 0      |
| eusr#10 | T4   | 0:10     | 5   | 0      |

|         |    |      |   |   |
|---------|----|------|---|---|
| eusr#10 | T5 | 0:08 | 3 | 0 |
|---------|----|------|---|---|
