# Supplementary material for: Examining Potential of Scents for Enhancement of User Performance with Mobile Apps
Source: Hindawi journal article supplement (doi:10.1155/2022/8776994), 2022-03-16
Supplement: f1 [file 8776994.f1.zip › 8776994.f1/raw_dataset_hr-controlgroup.pdf]

| users & apps<br>time (sec) | usr#1<br>App1 | usr#1<br>App2 | usr#1<br>App3 | usr#2<br>App1 | usr#2<br>App2 | usr#2<br>App3 |  |
|----------------------------|---------------|---------------|---------------|---------------|---------------|---------------|--|
| 1                          | 133           | 198           | 172           | 74            | 63            | 67            |  |
| 2                          | 134           | 197           | 156           | 74            | 63            | 67            |  |
| 3                          | 134           | 192           | 149           | 74            | 63            | 67            |  |
| 4                          | 134           | 174           | 146           | 75            | 62            | 67            |  |
| 5                          | 136           | 174           | 140           | 75            | 61            | 67            |  |
| 6                          | 136           | 172           | 132           | 74            | 61            | 67            |  |
| 7                          | 136           | 170           | 131           | 74            | 61            | 72            |  |
| 8                          | 136           | 169           | 129           | 73            | 62            | 72            |  |
| 9                          | 135           | 167           | 127           | 73            | 62            | 75            |  |
| 10                         | 135           | 147           | 124           | 72            | 62            | 75            |  |
| 11                         | 135           | 151           | 123           | 71            | 62            | 73            |  |
| 12                         | 134           | 161           | 122           | 72            | 63            | 72            |  |
| 13                         | 128           | 160           | 121           | 73            | 64            | 71            |  |
| 14                         | 118           | 157           | 121           | 72            | 64            | 71            |  |
| 15                         | 118           | 157           | 121           | 71            | 64            | 70            |  |
| 16                         | 116           | 156           | 121           | 70            | 65            | 70            |  |
| 17                         | 115           | 156           | 122           | 69            | 65            | 70            |  |
| 18                         | 115           | 156           | 123           | 69            | 65            | 70            |  |
| 19                         | 115           | 156           | 124           | 70            | 66            | 70            |  |
| 20                         | 114           | 153           | 124           | 71            | 66            | 70            |  |
| 21                         | 114           | 152           | 124           | 72            | 67            | 70            |  |
| 22                         | 113           | 149           | 129           | 72            | 67            | 70            |  |
| 23                         | 113           | 148           | 132           | 73            | 67            | 70            |  |
| 24                         | 113           | 148           | 135           | 73            | 67            | 70            |  |
| 25                         | 113           | 147           | 136           | 74            | 68            | 70            |  |
| 26                         | 113           | 147           | 136           | 74            | 69            | 70            |  |
| 27                         | 113           | 146           | 136           | 76            | 69            | 70            |  |
| 28                         | 114           | 146           | 136           | 78            | 69            | 70            |  |
| 29                         | 111           | 146           | 136           | 78            | 71            | 70            |  |
| 30                         | 109           | 145           | 136           | 74            | 73            | 70            |  |
| 31                         | 106           | 145           | 135           | 73            | 74            | 70            |  |
| 32                         | 102           | 145           | 135           | 74            | 77            | 70            |  |
| 33                         | 102           | 145           | 135           | 76            | 77            | 70            |  |
| 34                         | 101           | 144           | 135           | 77            | 75            | 71            |  |
| 35                         | 100           | 140           | 135           | 79            | 75            | 71            |  |
| 36                         | 99            | 136           | 134           | 80            | 69            | 71            |  |
| 37                         | 90            | 136           | 134           | 81            | 66            | 71            |  |
| 38                         | 87            | 137           | 134           | 81            | 66            | 71            |  |
| 39                         | 86            | 138           | 134           | 77            | 66            | 72            |  |
| 40                         | 86            | 140           | 134           | 77            | 67            | 72            |  |
| 41                         | 84            | 145           | 135           | 73            | 67            | 73            |  |
| 42                         | 83            | 146           | 136           | 72            | 67            | 74            |  |
| 43                         | 83            | 146           | 137           | 72            | 67            | 74            |  |
| 44                         | 84            | 146           | 137           | 75            | 67            | 74            |  |
| 45                         | 86            | 145           | 137           | 76            | 68            | 74            |  |
| 46                         | 87            | 145           | 136           | 77            | 68            | 75            |  |
| 47                         | 89            | 144           | 136           | 77            | 68            | 75            |  |
| 48                         | 85            | 142           | 136           | 78            | 68            | 74            |  |

|    |     |     |     |    |    |    |
|----|-----|-----|-----|----|----|----|
| 49 | 81  | 141 | 136 | 78 | 68 | 73 |
| 50 | 75  | 141 | 136 | 79 | 68 | 71 |
| 51 | 74  | 141 | 133 | 80 | 68 | 71 |
| 52 | 73  | 142 | 121 | 80 | 69 | 73 |
| 53 | 73  | 142 | 121 | 80 | 70 | 73 |
| 54 | 72  | 150 | 119 | 81 | 70 | 73 |
| 55 | 72  | 167 | 118 | 81 | 70 | 74 |
| 56 | 72  | 168 | 128 | 82 | 70 | 74 |
| 57 | 73  | 169 | 130 | 83 | 70 | 74 |
| 58 | 74  | 171 | 131 | 85 | 70 | 74 |
| 59 | 75  | 172 | 167 | 84 | 73 | 75 |
| 60 | 84  | 153 | 184 | 84 | 74 | 74 |
| 61 | 86  | 150 | 184 | 83 | 74 | 74 |
| 62 | 88  | 148 | 185 | 83 | 74 | 74 |
| 63 | 90  | 147 | 185 | 83 | 74 | 74 |
| 64 | 92  | 147 | 187 | 82 | 74 | 74 |
| 65 | 99  | 149 | 186 | 82 | 74 | 75 |
| 66 | 104 | 150 | 191 | 81 | 74 | 74 |
| 67 | 118 | 151 | 191 | 80 | 74 | 75 |
| 68 | 120 | 152 | 198 | 79 | 74 | 75 |
| 69 | 121 | 154 | 183 | 78 | 74 | 75 |
| 70 | 128 | 155 | 183 | 78 | 74 | 73 |
| 71 | 131 | 155 | 181 | 77 | 74 | 73 |
| 72 | 131 | 156 | 181 | 76 | 75 | 73 |
| 73 | 133 | 157 | 168 | 76 | 75 | 73 |
| 74 | 139 | 155 | 147 | 76 | 76 | 73 |
| 75 | 192 | 155 | 138 | 76 | 77 | 73 |
| 76 | 196 | 157 | 135 | 76 | 78 | 73 |
| 77 | 198 | 155 | 135 | 76 | 80 | 75 |
| 78 | 199 | 153 | 135 | 76 | 82 | 75 |
| 79 | 200 | 143 | 135 | 76 | 81 | 75 |
| 80 | 200 | 142 | 135 | 76 | 79 | 75 |
| 81 | 200 | 143 | 135 | 77 | 79 | 75 |
| 82 | 200 | 146 | 134 | 78 | 79 | 75 |
| 83 | 201 | 153 | 134 | 79 | 79 | 75 |
| 84 | 200 | 166 | 127 | 79 | 78 | 74 |
| 85 | 173 | 170 | 124 | 78 | 77 | 74 |
| 86 | 163 | 172 | 125 | 78 | 74 | 73 |
| 87 | 163 | 174 | 126 | 80 | 73 | 73 |
| 88 | 161 | 176 | 126 | 81 | 72 | 74 |
| 89 | 153 | 176 | 127 | 81 | 72 | 73 |
| 90 | 150 | 177 | 127 | 82 | 72 | 72 |
| 91 | 158 | 177 | 127 | 83 | 72 | 72 |
| 92 | 166 | 175 | 129 | 83 | 72 | 71 |
| 93 | 173 | 173 | 130 | 83 | 75 | 71 |
| 94 | 178 | 170 | 130 | 83 | 77 | 72 |
| 95 | 181 | 164 | 130 | 83 | 77 | 73 |
| 96 | 183 | 137 | 128 | 83 | 77 | 73 |
| 97 | 183 | 131 | 131 | 84 | 77 | 73 |
| 98 | 183 | 127 | 139 | 88 | 77 | 75 |

|     |     |     |     |    |    |    |
|-----|-----|-----|-----|----|----|----|
| 99  | 169 | 126 | 139 | 88 | 77 | 75 |
| 100 | 170 | 126 | 140 | 88 | 77 | 76 |
| 101 | 171 | 130 | 152 | 88 | 77 | 77 |
| 102 | 159 | 155 | 153 | 87 | 79 | 78 |
| 103 | 157 | 160 | 154 | 82 | 79 | 78 |
| 104 | 155 | 163 | 154 | 78 | 80 | 74 |
| 105 | 154 | 161 | 155 | 75 | 80 | 74 |
| 106 | 153 | 160 | 159 | 75 | 80 | 74 |
| 107 | 153 | 156 | 180 | 77 | 79 | 74 |
| 108 | 152 | 142 | 184 | 78 | 78 | 74 |
| 109 | 153 | 138 | 186 | 79 | 78 | 75 |
| 110 | 153 | 138 | 182 | 79 | 78 | 75 |
| 111 | 169 | 138 | 181 | 79 | 78 | 74 |
| 112 | 175 | 138 | 181 | 79 | 78 | 73 |
| 113 | 176 | 138 | 181 | 74 | 78 | 74 |
| 114 | 178 | 140 | 181 | 74 | 77 | 74 |
| 115 | 182 | 153 | 181 | 70 | 77 | 73 |
| 116 | 184 | 150 | 180 | 70 | 77 | 72 |
| 117 | 182 | 149 | 179 | 70 | 77 | 72 |
| 118 | 181 | 147 | 179 | 70 | 79 | 72 |
| 119 | 180 | 148 | 182 | 70 | 79 | 72 |
| 120 | 179 | 147 | 182 | 69 | 79 | 72 |
| 121 | 179 | 141 | 180 | 69 | 79 | 72 |
| 122 | 178 | 135 | 180 | 69 | 79 | 72 |
| 123 | 179 | 135 | 177 | 67 | 80 | 72 |
| 124 | 180 | 133 | 177 | 66 | 80 | 73 |
| 125 | 180 | 133 | 175 | 65 | 80 | 73 |
| 126 | 184 | 133 | 153 | 65 | 80 | 74 |
| 127 | 184 | 136 | 146 | 71 | 78 | 74 |
| 128 | 185 | 144 | 145 | 71 | 78 | 75 |
| 129 | 185 | 149 | 145 | 72 | 78 | 76 |
| 130 | 203 | 152 | 145 | 73 | 78 | 77 |
| 131 | 202 | 152 | 134 | 73 | 77 | 77 |
| 132 | 174 | 152 | 131 | 73 | 77 | 77 |
| 133 | 171 | 152 | 132 | 73 | 77 | 77 |
| 134 | 169 | 153 | 132 | 73 | 77 | 76 |
| 135 | 167 | 155 | 132 | 74 | 77 | 76 |
| 136 | 164 | 155 | 130 | 74 | 76 | 76 |
| 137 | 163 | 156 | 130 | 74 | 76 | 76 |
| 138 | 163 | 156 | 129 | 74 | 76 | 80 |
| 139 | 157 | 156 | 129 | 75 | 76 | 81 |
| 140 | 143 | 157 | 129 | 75 | 76 | 81 |
| 141 | 138 | 157 | 129 | 75 | 75 | 77 |
| 142 | 135 | 158 | 129 | 75 | 75 | 70 |
| 143 | 133 | 163 | 129 | 75 | 75 | 68 |
| 144 | 133 | 162 | 128 | 75 | 74 | 68 |
| 145 | 132 | 159 | 128 | 75 | 72 | 69 |
| 146 | 131 | 159 | 128 | 74 | 72 | 70 |
| 147 | 131 | 167 | 132 | 73 | 72 | 70 |
| 148 | 130 | 166 | 136 | 72 | 72 | 70 |

|     |     |     |     |    |    |    |
|-----|-----|-----|-----|----|----|----|
| 149 | 129 | 166 | 136 | 72 | 72 | 70 |
| 150 | 129 | 166 | 138 | 73 | 73 | 70 |
| 151 | 129 | 166 | 140 | 73 | 73 | 70 |
| 152 | 129 | 165 | 140 | 72 | 75 | 70 |
| 153 | 129 | 165 | 141 | 72 | 76 | 70 |
| 154 | 133 | 164 | 141 | 70 | 76 | 70 |
| 155 | 134 | 163 | 141 | 70 | 76 | 70 |
| 156 | 139 | 163 | 141 | 70 | 76 | 70 |
| 157 | 140 | 163 | 141 | 70 | 76 | 70 |
| 158 | 142 | 162 | 140 | 75 | 77 | 70 |
| 159 | 144 | 159 | 139 | 75 | 77 | 70 |
| 160 | 145 | 159 | 138 | 75 | 77 | 70 |
| 161 | 145 | 159 | 138 | 75 | 76 | 70 |
| 162 | 145 | 159 | 138 | 75 | 76 | 69 |
| 163 | 145 | 154 | 136 | 76 | 76 | 71 |
| 164 | 145 | 149 | 138 | 78 | 76 | 71 |
| 165 | 145 | 142 | 146 | 78 | 75 | 71 |
| 166 | 145 | 139 | 151 | 79 | 75 | 71 |
| 167 | 145 | 138 | 153 | 80 | 75 | 71 |
| 168 | 145 | 137 | 155 | 80 | 75 | 71 |
| 169 | 145 | 136 | 156 | 80 | 74 | 71 |
| 170 | 145 | 136 | 161 | 80 | 74 | 71 |
| 171 | 145 | 135 | 164 | 80 | 74 | 71 |
| 172 | 146 | 134 | 166 | 80 | 74 | 71 |
| 173 | 146 | 134 | 173 | 80 | 74 | 72 |
| 174 | 146 | 133 | 183 | 80 | 75 | 72 |
| 175 | 146 | 133 | 188 | 80 | 75 | 71 |
| 176 | 147 | 128 | 191 | 80 | 75 | 71 |
| 177 | 147 | 123 | 192 | 79 | 76 | 72 |
| 178 | 147 | 121 | 189 | 74 | 75 | 71 |
| 179 | 147 | 119 | 188 | 73 | 73 | 71 |
| 180 | 147 | 117 | 190 | 72 | 70 | 71 |
| 181 | 147 | 113 | 191 | 72 | 70 | 70 |
| 182 | 147 | 105 | 192 | 75 | 71 | 70 |
| 183 | 147 | 105 | 190 | 76 | 70 | 70 |
| 184 | 148 | 104 | 190 | 76 | 68 | 70 |
| 185 | 148 | 104 | 190 | 75 | 68 | 69 |
| 186 | 150 | 103 | 188 | 73 | 68 | 69 |
| 187 | 151 | 119 | 188 | 72 | 68 | 69 |
| 188 | 151 | 122 | 188 | 70 | 68 | 69 |
| 189 | 151 | 122 | 186 | 68 | 68 | 69 |
| 190 | 151 | 127 | 168 | 68 | 68 | 69 |
| 191 | 151 | 129 | 155 | 68 | 68 | 68 |
| 192 | 152 | 129 | 152 | 69 | 68 | 68 |
| 193 | 151 | 129 | 151 | 72 | 68 | 68 |
| 194 | 149 | 128 | 150 | 74 | 68 | 69 |
| 195 | 148 | 132 | 149 | 75 | 68 | 69 |
| 196 | 147 | 134 | 148 | 75 | 68 | 70 |
| 197 | 147 | 135 | 143 | 75 | 68 | 72 |
| 198 | 147 | 134 | 142 | 76 | 74 | 72 |

|     |     |     |     |    |    |    |
|-----|-----|-----|-----|----|----|----|
| 199 | 147 | 131 | 142 | 76 | 75 | 72 |
| 200 | 147 | 129 | 138 | 77 | 74 | 73 |
| 201 | 147 | 126 | 132 | 78 | 74 | 73 |
| 202 | 147 | 124 | 128 | 80 | 74 | 74 |
| 203 | 146 | 124 | 133 | 81 | 74 | 74 |
| 204 | 150 | 125 | 134 | 83 | 70 | 76 |
| 205 | 154 | 125 | 134 | 83 | 70 | 78 |
| 206 | 155 | 124 | 136 | 84 | 70 | 78 |
| 207 | 156 | 124 | 138 | 84 | 70 | 78 |
| 208 | 157 | 128 | 139 | 84 | 71 | 78 |
| 209 | 161 | 129 | 139 | 84 | 71 | 78 |
| 210 | 164 | 129 | 140 | 83 | 72 | 78 |
| 211 | 164 | 130 | 141 | 83 | 72 | 78 |
| 212 | 149 | 130 | 144 | 83 | 72 | 76 |
| 213 | 146 | 131 | 144 | 83 | 71 | 75 |
| 214 | 146 | 132 | 163 | 83 | 70 | 71 |
| 215 | 146 | 132 | 171 | 82 | 70 | 71 |
| 216 | 146 | 133 | 184 | 82 | 70 | 70 |
| 217 | 146 | 133 | 184 | 82 | 70 | 71 |
| 218 | 146 | 133 | 185 | 82 | 72 | 74 |
| 219 | 139 | 133 | 185 | 83 | 72 | 75 |
| 220 | 139 | 130 | 186 | 84 | 72 | 75 |
| 221 | 134 | 123 | 186 | 84 | 72 | 74 |
| 222 | 134 | 119 | 197 | 79 | 72 | 74 |
| 223 | 132 | 110 | 198 | 76 | 72 | 74 |
| 224 | 141 | 102 | 198 | 75 | 73 | 73 |
| 225 | 147 | 97  | 174 | 75 | 76 | 74 |
| 226 | 150 | 94  | 171 | 75 | 78 | 74 |
| 227 | 159 | 85  | 168 | 75 | 79 | 75 |
| 228 | 162 | 86  | 165 | 75 | 78 | 76 |
| 229 | 176 | 87  | 163 | 75 | 79 | 76 |
| 230 | 184 | 87  | 158 | 75 | 79 | 73 |
| 231 | 188 | 86  | 158 | 75 | 79 | 69 |
| 232 | 188 | 86  | 158 | 74 | 78 | 68 |
| 233 | 188 | 86  | 158 | 74 | 78 | 67 |
| 234 | 189 | 86  | 166 | 74 | 77 | 67 |
| 235 | 189 | 86  | 167 | 76 | 77 | 67 |
| 236 | 193 | 85  | 168 | 77 | 77 | 67 |
| 237 | 185 | 87  | 174 | 76 | 77 | 67 |
| 238 | 181 | 87  | 179 | 75 | 77 | 67 |
| 239 | 180 | 88  | 183 | 75 | 77 | 67 |
| 240 | 179 | 90  | 187 | 75 | 78 | 66 |
| 241 | 178 | 91  | 187 | 75 | 79 | 67 |
| 242 | 178 | 91  | 187 | 76 | 79 | 67 |
| 243 | 178 | 91  | 190 | 76 | 79 | 67 |
| 244 | 177 | 91  | 190 | 76 | 79 | 67 |
| 245 | 177 | 92  | 190 | 76 | 78 | 67 |
| 246 | 177 | 93  | 191 | 75 | 72 | 67 |
| 247 | 173 | 94  | 191 | 75 | 70 | 67 |
| 248 | 172 | 94  | 188 | 75 | 70 | 67 |

|     |     |    |     |    |    |    |
|-----|-----|----|-----|----|----|----|
| 249 | 172 | 94 | 188 | 75 | 70 | 67 |
| 250 | 168 | 94 | 172 | 75 | 70 | 67 |
| 251 | 165 | 94 | 171 | 75 | 70 | 67 |
| 252 | 152 | 91 | 171 | 75 | 70 | 67 |
| 253 | 149 | 74 | 171 | 74 | 70 | 67 |
| 254 | 147 | 73 | 170 | 73 | 69 | 67 |
| 255 | 146 | 74 | 170 | 71 | 70 | 67 |
| 256 | 144 | 73 | 170 | 70 | 70 | 68 |
| 257 | 138 | 65 | 169 | 70 | 70 | 68 |
| 258 | 137 | 64 | 167 | 71 | 70 | 69 |
| 259 | 136 | 64 | 158 | 74 | 70 | 69 |
| 260 | 136 | 65 | 153 | 78 | 71 | 69 |
| 261 | 136 | 66 | 153 | 78 | 72 | 69 |
| 262 | 139 | 70 | 161 | 78 | 70 | 69 |
| 263 | 141 | 72 | 166 | 78 | 68 | 69 |
| 264 | 142 | 73 | 168 | 78 | 67 | 69 |
| 265 | 143 | 69 | 171 | 75 | 67 | 69 |
| 266 | 143 | 68 | 174 | 75 | 67 | 69 |
| 267 | 138 | 69 | 176 | 74 | 67 | 69 |
| 268 | 137 | 70 | 182 | 74 |    | 66 |
| 269 | 137 | 73 | 185 | 74 |    | 66 |
| 270 | 137 | 77 | 186 | 74 |    | 65 |
| 271 | 137 | 80 | 183 | 74 |    | 63 |
| 272 | 136 | 84 | 181 | 75 |    | 63 |
| 273 | 136 | 86 | 181 | 75 |    | 64 |
| 274 | 136 | 88 | 181 | 75 |    | 64 |
| 275 | 136 | 88 | 181 | 74 |    | 64 |
| 276 | 136 | 87 | 181 | 74 |    | 71 |
| 277 | 136 | 86 | 181 | 74 |    | 71 |
| 278 | 132 | 85 | 181 | 74 |    | 72 |
| 279 | 132 | 84 | 181 | 73 |    | 73 |
| 280 | 132 | 83 | 181 | 73 |    | 73 |
| 281 | 132 | 81 | 180 | 73 |    | 72 |
| 282 | 134 | 81 | 180 | 73 |    | 72 |
| 283 | 135 | 82 | 180 | 72 |    | 68 |
| 284 | 124 | 82 | 180 | 71 |    | 66 |
| 285 | 123 | 84 | 180 | 70 |    | 66 |
| 286 | 123 | 84 | 179 | 69 |    | 67 |
| 287 | 141 | 85 | 176 | 69 |    | 67 |
| 288 | 142 | 74 | 174 | 68 |    | 67 |
| 289 | 143 | 71 | 170 | 74 |    | 67 |
| 290 | 146 | 71 | 169 | 75 |    | 67 |
| 291 | 147 | 71 | 169 | 73 |    | 67 |
| 292 | 141 | 70 | 167 | 72 |    | 67 |
| 293 | 140 | 70 | 160 | 72 |    | 66 |
| 294 | 142 | 70 | 156 | 71 |    | 63 |
| 295 | 144 | 69 | 154 | 71 |    | 63 |
| 296 | 145 | 84 | 151 | 71 |    | 64 |
| 297 | 146 | 87 | 151 | 71 |    | 65 |
| 298 | 146 | 99 | 151 | 71 |    | 66 |

|     |     |     |     |    |    |
|-----|-----|-----|-----|----|----|
| 299 | 147 | 103 | 151 | 72 | 66 |
| 300 | 147 | 105 | 152 | 73 | 65 |
| 301 | 149 | 105 | 151 | 73 | 65 |
| 302 | 151 | 107 | 150 | 72 | 66 |
| 303 | 154 | 108 | 150 | 70 | 67 |
| 304 | 155 | 108 | 150 | 70 | 68 |
| 305 | 159 | 108 | 150 | 70 | 70 |
| 306 | 159 | 108 | 150 | 70 | 71 |
| 307 | 160 | 113 | 150 | 70 | 71 |
| 308 | 160 | 114 | 150 | 71 | 71 |
| 309 | 160 | 115 | 150 | 71 | 71 |
| 310 | 160 | 116 | 145 | 71 | 71 |
| 311 | 159 | 116 | 145 | 71 | 71 |
| 312 | 156 | 117 | 145 | 70 | 71 |
| 313 | 148 | 118 | 145 | 70 | 71 |
| 314 | 147 | 119 | 145 | 70 | 71 |
| 315 | 147 | 119 | 145 | 70 | 72 |
| 316 | 146 | 119 | 145 | 71 | 79 |
| 317 | 146 | 119 | 145 | 71 | 80 |
| 318 | 146 | 119 | 145 | 75 | 80 |
| 319 | 145 | 135 | 145 | 75 | 79 |
| 320 | 144 | 144 | 142 | 73 | 76 |
| 321 | 144 | 144 | 142 | 72 | 75 |
| 322 | 141 | 153 | 142 | 72 | 74 |
| 323 | 140 | 169 | 142 | 72 | 74 |
| 324 | 140 | 175 | 142 | 71 | 73 |
| 325 | 140 | 181 | 142 | 71 | 72 |
| 326 | 140 | 184 | 142 | 71 | 71 |
| 327 | 140 | 185 | 143 | 71 | 71 |
| 328 | 141 | 186 | 143 | 71 | 71 |
| 329 | 141 | 186 | 159 | 72 | 71 |
| 330 | 142 | 186 | 158 | 73 | 71 |
| 331 | 143 | 186 | 158 | 74 | 71 |
| 332 | 145 | 186 | 151 | 72 | 71 |
| 333 | 145 | 186 | 147 | 72 | 71 |
| 334 | 143 | 186 | 139 | 73 | 71 |
| 335 | 143 | 187 | 138 | 74 | 71 |
| 336 | 144 | 187 | 138 | 75 | 71 |
| 337 | 148 | 186 | 138 | 75 | 71 |
| 338 | 149 | 186 | 138 | 75 | 71 |
| 339 | 158 | 185 | 147 | 75 | 73 |
| 340 | 159 | 184 | 155 | 76 | 78 |
| 341 | 160 | 183 | 160 | 76 | 78 |
| 342 | 160 | 181 | 158 | 76 | 78 |
| 343 | 160 | 181 | 157 | 70 | 77 |
| 344 | 160 | 180 | 157 | 70 | 77 |
| 345 | 160 | 177 | 159 | 69 | 76 |
| 346 | 164 | 175 | 160 | 69 | 76 |
| 347 | 165 | 172 | 154 | 70 | 76 |
| 348 | 165 | 167 | 149 | 70 | 76 |

|     |     |     |     |    |    |
|-----|-----|-----|-----|----|----|
| 349 | 168 | 165 | 148 | 70 | 76 |
| 350 | 168 | 164 | 144 | 70 | 72 |
| 351 | 168 | 163 | 139 | 69 | 70 |
| 352 | 168 | 163 | 139 | 69 | 69 |
| 353 | 168 | 163 | 140 | 70 |    |
| 354 | 169 | 163 | 140 | 71 |    |
| 355 | 169 | 163 | 140 | 71 |    |
| 356 | 169 | 163 | 140 | 71 |    |
| 357 | 170 | 163 | 139 | 71 |    |
| 358 | 170 | 163 | 139 | 72 |    |
| 359 | 171 | 163 | 139 | 74 |    |
| 360 | 170 | 163 | 139 | 74 |    |
| 361 | 169 | 164 | 135 | 75 |    |
| 362 | 169 | 164 | 132 | 76 |    |
| 363 | 169 | 162 | 133 | 78 |    |
| 364 | 169 | 159 | 134 | 78 |    |
| 365 | 168 | 153 | 134 | 78 |    |
| 366 | 169 | 148 | 135 | 76 |    |
| 367 | 169 | 132 | 136 | 73 |    |
| 368 | 168 | 123 | 136 | 70 |    |
| 369 | 166 | 122 | 136 | 69 |    |
| 370 | 163 | 120 | 137 | 66 |    |
| 371 | 162 | 107 | 137 | 65 |    |
| 372 | 155 | 103 | 140 | 63 |    |
| 373 | 154 | 97  | 142 | 63 |    |
| 374 | 153 | 92  | 143 | 64 |    |
| 375 | 126 | 90  | 145 | 64 |    |
| 376 | 126 | 86  | 145 | 63 |    |
| 377 | 121 | 86  | 146 |    |    |
| 378 | 119 | 86  | 146 |    |    |
| 379 | 115 | 86  | 147 |    |    |
| 380 | 109 | 86  | 150 |    |    |
| 381 | 109 | 86  | 150 |    |    |
| 382 | 106 | 86  | 150 |    |    |
| 383 | 104 | 86  | 150 |    |    |
| 384 | 105 | 85  | 150 |    |    |
| 385 | 111 | 86  | 150 |    |    |
| 386 | 113 | 86  | 149 |    |    |
| 387 | 114 | 86  | 149 |    |    |
| 388 | 115 | 86  | 148 |    |    |
| 389 | 116 | 86  |     |    |    |
| 390 | 118 | 86  |     |    |    |
| 391 | 119 | 87  |     |    |    |
| 392 | 119 | 89  |     |    |    |
| 393 | 119 | 93  |     |    |    |
| 394 | 119 | 101 |     |    |    |
| 395 | 118 | 96  |     |    |    |
| 396 | 125 | 94  |     |    |    |
| 397 | 125 | 93  |     |    |    |
| 398 | 127 | 91  |     |    |    |

|     |     |    |
|-----|-----|----|
| 399 | 152 | 90 |
| 400 | 158 | 89 |
| 401 | 161 | 88 |
| 402 | 161 | 86 |
| 403 | 163 | 86 |
| 404 | 164 | 86 |
| 405 | 166 | 86 |
| 406 | 173 | 87 |
| 407 | 173 | 87 |
| 408 | 175 | 88 |
| 409 | 176 | 87 |
| 410 | 176 | 79 |
| 411 | 177 | 78 |
| 412 | 171 | 77 |
| 413 | 171 | 73 |
| 414 | 169 | 70 |
| 415 | 169 | 69 |
| 416 | 168 | 67 |
| 417 | 165 | 65 |
| 418 | 163 | 64 |
| 419 | 163 | 64 |
| 420 | 162 | 63 |
| 421 | 162 | 64 |
| 422 | 162 | 64 |
| 423 | 161 | 64 |
| 424 | 161 | 64 |
| 425 | 161 | 64 |
| 426 | 161 | 63 |
| 427 | 135 | 62 |
| 428 | 131 | 62 |
| 429 | 108 | 61 |
| 430 | 108 | 61 |
| 431 | 108 | 59 |
| 432 | 109 | 59 |
| 433 | 109 | 60 |
| 434 | 109 | 60 |
| 435 | 108 | 63 |
| 436 | 109 | 66 |
| 437 | 121 | 71 |
| 438 | 134 | 74 |
| 439 | 136 | 75 |
| 440 | 136 | 79 |
| 441 | 135 | 84 |
| 442 | 115 | 86 |
| 443 | 111 | 87 |
| 444 | 111 | 88 |
| 445 | 110 | 88 |
| 446 | 109 | 89 |
| 447 | 111 | 89 |
| 448 | 111 | 89 |

|     |     |     |
|-----|-----|-----|
| 449 | 112 | 90  |
| 450 | 124 | 90  |
| 451 | 127 | 91  |
| 452 | 133 | 91  |
| 453 | 135 | 79  |
| 454 | 140 | 78  |
| 455 | 145 | 76  |
| 456 | 156 | 76  |
| 457 | 158 | 77  |
| 458 | 160 | 76  |
| 459 | 165 | 76  |
| 460 | 166 | 76  |
| 461 | 166 | 75  |
| 462 | 177 | 73  |
| 463 | 181 | 71  |
| 464 | 183 | 74  |
| 465 | 186 | 75  |
| 466 | 187 | 75  |
| 467 | 188 | 75  |
| 468 | 188 | 75  |
| 469 | 188 | 75  |
| 470 | 186 | 74  |
| 471 | 184 | 74  |
| 472 | 182 | 74  |
| 473 | 182 | 74  |
| 474 | 181 | 73  |
| 475 | 182 | 72  |
| 476 | 183 | 122 |
| 477 | 184 | 128 |
| 478 | 181 | 129 |
| 479 | 179 | 131 |
| 480 | 164 | 131 |
| 481 | 162 |     |
| 482 | 160 |     |
| 483 | 159 |     |
| 484 | 152 |     |
| 485 | 149 |     |
| 486 | 149 |     |
| 487 | 160 |     |
| 488 | 161 |     |
| 489 | 164 |     |
| 490 | 164 |     |
| 491 | 164 |     |
| 492 | 164 |     |
| 493 | 166 |     |
| 494 | 167 |     |
| 495 | 160 |     |
| 496 | 124 |     |
| 497 | 115 |     |
| 498 | 111 |     |

|     |     |
|-----|-----|
| 499 | 108 |
| 500 | 107 |
| 501 | 106 |
| 502 | 104 |
| 503 | 94  |
| 504 | 92  |
| 505 | 92  |
| 506 | 92  |
| 507 | 92  |
| 508 | 92  |
| 509 | 93  |
| 510 | 100 |
| 511 | 107 |
| 512 | 109 |
| 513 | 140 |
| 514 | 156 |
| 515 | 163 |
| 516 | 165 |
| 517 | 164 |
| 518 | 169 |
| 519 | 182 |
| 520 | 182 |
| 521 | 179 |
| 522 | 177 |
| 523 | 175 |
| 524 | 175 |
| 525 | 176 |
| 526 | 176 |
| 527 | 170 |
| 528 | 169 |
| 529 | 167 |
| 530 | 165 |
| 531 | 162 |
| 532 | 160 |
| 533 | 160 |
| 534 | 160 |
| 535 | 161 |
| 536 | 162 |
| 537 | 161 |
| 538 | 163 |
| 539 | 165 |
| 540 | 166 |
| 541 | 152 |
| 542 | 150 |
| 543 | 149 |
| 544 | 148 |
| 545 | 148 |
| 546 | 148 |
| 547 | 148 |
| 548 | 148 |

|     |     |
|-----|-----|
| 549 | 146 |
| 550 | 146 |
| 551 | 162 |
| 552 | 163 |
| 553 | 184 |
| 554 | 194 |
| 555 | 195 |
| 556 | 195 |
| 557 | 197 |
| 558 | 199 |
| 559 | 200 |
| 560 | 199 |
| 561 | 197 |
| 562 | 197 |
| 563 | 196 |
| 564 | 161 |
| 565 | 159 |
| 566 | 134 |
| 567 | 133 |
| 568 | 131 |
| 569 | 131 |
| 570 | 131 |
| 571 | 132 |
| 572 | 138 |
| 573 | 137 |
| 574 | 137 |
| 575 | 137 |
| 576 | 136 |
| 577 | 143 |
| 578 | 141 |
| 579 | 136 |
| 580 | 135 |
| 581 | 135 |
| 582 | 138 |
| 583 | 140 |
| 584 | 144 |
| 585 | 158 |
| 586 | 164 |
| 587 | 165 |
| 588 | 165 |
| 589 | 164 |
| 590 | 164 |
| 591 | 163 |
| 592 | 163 |
| 593 | 161 |
| 594 | 149 |
| 595 | 149 |
| 596 | 148 |
| 597 | 148 |
| 598 | 187 |

|     |     |
|-----|-----|
| 599 | 189 |
| 600 | 190 |
| 601 | 192 |
| 602 | 178 |
| 603 | 168 |
| 604 | 168 |
| 605 | 167 |
| 606 | 166 |
| 607 | 166 |
| 608 | 165 |
| 609 | 161 |
| 610 | 157 |
| 611 | 156 |
| 612 | 155 |
| 613 | 154 |
| 614 | 154 |
| 615 | 153 |
| 616 | 154 |
| 617 | 156 |
| 618 | 156 |
| 619 | 153 |
| 620 | 154 |
| 621 | 154 |
| 622 | 156 |
| 623 | 157 |
| 624 | 162 |
| 625 | 167 |
| 626 | 171 |
| 627 | 158 |
| 628 | 156 |
| 629 | 156 |
| 630 | 163 |
| 631 | 172 |
| 632 | 173 |
| 633 | 173 |
| 634 | 173 |
| 635 | 164 |
| 636 | 154 |
| 637 | 153 |
| 638 | 139 |
| 639 | 140 |
| 640 | 140 |
| 641 | 139 |
| 642 | 133 |
| 643 | 130 |
| 644 | 129 |
| 645 | 129 |
| 646 | 127 |
| 647 | 125 |
| 648 | 122 |

|     |     |
|-----|-----|
| 649 | 122 |
| 650 | 122 |
| 651 | 122 |
| 652 | 121 |
| 653 | 118 |
| 654 | 114 |
| 655 | 112 |
| 656 | 107 |
| 657 | 107 |
| 658 | 106 |
| 659 | 105 |
| 660 | 105 |
| 661 | 106 |
| 662 | 107 |
| 663 | 108 |
| 664 | 110 |
| 665 | 111 |
| 666 | 112 |
| 667 | 113 |
| 668 | 113 |
| 669 | 113 |
| 670 | 113 |
| 671 | 112 |
| 672 | 112 |
| 673 | 111 |
| 674 | 111 |
| 675 | 116 |
| 676 | 118 |
| 677 | 121 |
| 678 | 122 |
| 679 | 122 |
| 680 | 122 |
| 681 | 123 |
| 682 | 125 |
| 683 | 128 |
| 684 | 128 |
| 685 | 127 |
| 686 | 126 |
| 687 | 138 |
| 688 | 140 |
| 689 | 142 |
| 690 | 151 |
| 691 | 155 |
| 692 | 159 |
| 693 | 155 |
| 694 | 154 |
| 695 | 170 |
| 696 | 177 |
| 697 | 179 |
| 698 | 180 |

|     |     |
|-----|-----|
| 699 | 179 |
| 700 | 161 |
| 701 | 159 |
| 702 | 158 |
| 703 | 156 |
| 704 | 155 |
| 705 | 155 |
| 706 | 155 |
| 707 | 151 |
| 708 | 149 |
| 709 | 149 |
| 710 | 148 |
| 711 | 153 |
| 712 | 157 |
| 713 | 159 |
| 714 | 159 |
| 715 | 156 |
| 716 | 160 |
| 717 | 165 |
| 718 | 166 |
| 719 | 166 |
| 720 | 165 |
| 721 | 164 |
| 722 | 164 |
| 723 | 164 |
| 724 | 164 |
| 725 | 164 |
| 726 | 163 |
| 727 | 163 |
| 728 | 152 |
| 729 | 151 |
| 730 | 148 |
| 731 | 154 |
| 732 | 160 |
| 733 | 161 |
| 734 | 161 |
| 735 | 161 |
| 736 | 161 |
| 737 | 159 |
| 738 | 158 |
| 739 | 129 |
| 740 | 121 |
| 741 | 120 |
| 742 | 115 |
| 743 | 110 |
| 744 | 108 |
| 745 | 106 |
| 746 | 110 |
| 747 | 112 |
| 748 | 118 |

|     |     |
|-----|-----|
| 749 | 119 |
| 750 | 122 |
| 751 | 124 |
| 752 | 127 |
| 753 | 127 |
| 754 | 128 |
| 755 | 130 |
| 756 | 131 |
| 757 | 133 |
| 758 | 135 |
| 759 | 135 |
| 760 | 136 |
| 761 | 136 |
| 762 | 137 |
| 763 | 138 |
| 764 | 140 |
| 765 | 140 |
| 766 | 141 |
| 767 | 142 |
| 768 | 145 |
| 769 | 146 |
| 770 | 147 |
| 771 | 148 |
| 772 | 148 |
| 773 | 149 |
| 774 | 149 |
| 775 | 149 |
| 776 | 149 |
| 777 | 148 |
| 778 | 148 |
| 779 | 149 |
| 780 | 150 |
| 781 | 155 |
| 782 | 160 |
| 783 | 160 |
| 784 | 167 |
| 785 | 177 |
| 786 | 178 |
| 787 | 161 |
| 788 | 158 |
| 789 | 151 |
| 790 | 147 |
| 791 | 140 |
| 792 | 135 |
| 793 | 132 |
| 794 | 132 |
| 795 | 133 |
| 796 | 133 |
| 797 | 133 |
| 798 | 135 |

|     |     |
|-----|-----|
| 799 | 135 |
| 800 | 135 |
| 801 | 136 |
| 802 | 138 |
| 803 | 139 |
| 804 | 150 |
| 805 | 159 |
| 806 | 164 |
| 807 | 166 |
| 808 | 166 |
| 809 | 166 |
| 810 | 169 |
| 811 | 170 |
| 812 | 172 |
| 813 | 172 |
| 814 | 172 |
| 815 | 173 |
| 816 | 172 |
| 817 | 171 |
| 818 | 157 |
| 819 | 153 |
| 820 | 151 |
| 821 | 155 |
| 822 | 161 |
| 823 | 163 |
| 824 | 166 |
| 825 | 170 |
| 826 | 171 |
| 827 | 173 |
| 828 | 176 |
| 829 | 176 |
| 830 | 176 |
| 831 | 176 |
| 832 | 176 |
| 833 | 176 |
| 834 | 177 |
| 835 | 178 |
| 836 | 179 |
| 837 | 179 |
| 838 | 180 |
| 839 | 179 |
| 840 | 179 |
| 841 | 178 |
| 842 | 174 |
| 843 | 174 |
| 844 | 176 |
| 845 | 177 |
| 846 | 178 |
| 847 | 176 |
| 848 | 166 |

|     |     |
|-----|-----|
| 849 | 161 |
| 850 | 154 |
| 851 | 152 |
| 852 | 151 |
| 853 | 151 |
| 854 | 149 |
| 855 | 148 |
| 856 | 148 |
| 857 | 148 |
| 858 | 148 |
| 859 | 148 |
| 860 | 149 |
| 861 | 150 |
| 862 | 150 |
| 863 | 150 |
| 864 | 150 |
| 865 | 150 |
| 866 | 151 |
| 867 | 151 |
| 868 | 152 |
| 869 | 153 |
| 870 | 155 |
| 871 | 157 |
| 872 | 158 |
| 873 | 163 |
| 874 | 163 |
| 875 | 162 |
| 876 | 157 |
| 877 | 157 |
| 878 | 157 |
| 879 | 157 |
| 880 | 157 |
| 881 | 157 |
| 882 | 158 |
| 883 | 160 |
| 884 | 165 |
| 885 | 164 |
| 886 | 168 |
| 887 | 168 |
| 888 | 168 |
| 889 | 168 |
| 890 | 168 |
| 891 | 168 |
| 892 | 168 |
| 893 | 166 |
| 894 | 165 |
| 895 | 165 |
| 896 | 165 |
| 897 | 161 |
| 898 | 188 |

|     |     |
|-----|-----|
| 899 | 189 |
| 900 | 190 |
| 901 | 190 |
| 902 | 188 |
| 903 | 184 |
| 904 | 184 |
| 905 | 184 |
| 906 | 184 |
| 907 | 184 |
| 908 | 184 |
| 909 | 183 |
| 910 | 183 |
| 911 | 183 |
| 912 | 182 |
| 913 | 181 |
| 914 | 185 |
| 915 | 172 |
| 916 | 171 |
| 917 | 171 |
| 918 | 171 |
| 919 | 172 |
| 920 | 176 |
| 921 | 177 |
| 922 | 178 |
| 923 | 178 |
| 924 | 178 |
| 925 | 178 |
| 926 | 173 |
| 927 | 173 |
| 928 | 173 |
| 929 | 173 |
| 930 | 173 |
| 931 | 173 |
| 932 | 173 |
| 933 | 173 |
| 934 | 176 |
| 935 | 179 |
| 936 | 180 |
| 937 | 187 |
| 938 | 188 |
| 939 | 186 |
| 940 | 186 |
| 941 | 185 |
| 942 | 182 |
| 943 | 181 |
| 944 | 181 |
| 945 | 180 |
| 946 | 180 |
| 947 | 180 |
| 948 | 180 |

|     |     |
|-----|-----|
| 949 | 180 |
| 950 | 180 |
| 951 | 178 |
| 952 | 178 |
| 953 | 178 |
| 954 | 177 |
| 955 | 177 |
| 956 | 177 |
| 957 | 177 |
| 958 | 176 |
| 959 | 175 |
| 960 | 174 |
| 961 | 174 |
| 962 | 172 |
| 963 | 172 |
| 964 | 172 |
| 965 | 171 |
| 966 | 171 |
| 967 | 171 |
| 968 | 171 |
| 969 | 171 |
| 970 | 172 |
| 971 | 172 |
| 972 | 172 |
| 973 | 172 |
| 974 | 172 |
| 975 | 172 |

| usr#3<br>App1 | usr#3<br>App2 | usr#3<br>App3 | usr#4<br>App1 | usr#4<br>App2 | usr#4<br>App3 | usr#5<br>App1 |    |
|---------------|---------------|---------------|---------------|---------------|---------------|---------------|----|
|               | 68            | 104           | 99            | 76            | 78            | 88            | 80 |
|               | 79            | 104           | 99            | 78            | 83            | 90            | 82 |
|               | 81            | 105           | 100           | 83            | 84            | 91            | 83 |
|               | 81            | 106           | 100           | 84            | 82            | 90            | 85 |
|               | 81            | 107           | 102           | 84            | 81            | 88            | 84 |
|               | 81            | 106           | 103           | 79            | 79            | 83            | 83 |
|               | 81            | 105           | 104           | 77            | 80            | 81            | 84 |
|               | 85            | 102           | 104           | 76            | 80            | 79            | 84 |
|               | 85            | 101           | 105           | 76            | 81            | 79            | 85 |
|               | 83            | 101           | 106           | 77            | 82            | 79            | 82 |
|               | 83            | 100           | 106           | 81            | 83            | 79            | 81 |
|               | 82            | 99            | 106           | 84            | 83            | 79            | 84 |
|               | 82            | 99            | 103           | 87            | 83            | 80            | 87 |
|               | 82            | 99            | 97            | 90            | 83            | 82            | 89 |
|               | 83            | 99            | 96            | 92            | 83            | 86            | 90 |
|               | 84            | 98            | 96            | 92            | 83            | 89            | 90 |
|               | 85            | 98            | 96            | 92            | 84            | 89            | 89 |
|               | 85            | 98            | 95            | 90            | 85            | 89            | 89 |
|               | 85            | 97            | 94            | 87            | 86            | 89            | 87 |
|               | 86            | 99            | 92            | 85            | 86            | 89            | 85 |
|               | 88            | 102           | 91            | 84            | 87            | 89            | 84 |
|               | 90            | 102           | 90            | 84            | 88            | 89            | 85 |
|               | 91            | 102           | 88            | 85            | 88            | 89            | 85 |
|               | 91            | 102           | 86            | 86            | 88            | 89            | 86 |
|               | 88            | 102           | 85            | 87            | 95            | 90            | 93 |
|               | 87            | 102           | 84            | 87            | 97            | 91            | 87 |
|               | 86            | 102           | 83            | 88            | 97            | 93            | 88 |
|               | 86            | 102           | 83            | 87            | 96            | 95            | 87 |
|               | 86            | 102           | 85            | 85            | 94            | 95            | 85 |
|               | 85            | 102           | 86            | 83            | 93            | 95            | 83 |
|               | 85            | 100           | 86            | 83            | 92            | 94            | 83 |
|               | 85            | 99            | 87            | 83            | 91            | 94            | 83 |
|               | 84            | 98            | 87            | 85            | 91            | 94            | 85 |
|               | 84            | 97            | 87            | 86            | 91            | 94            | 86 |
|               | 84            | 97            | 88            | 88            | 91            | 94            | 88 |
|               | 85            | 97            | 88            | 88            | 91            | 94            | 92 |
|               | 85            | 97            | 89            | 86            | 91            | 94            | 91 |
|               | 85            | 96            | 90            | 83            | 91            | 93            | 83 |
|               | 85            | 96            | 91            | 81            | 87            | 93            | 81 |
|               | 86            | 96            | 92            | 80            | 83            | 87            | 80 |
|               | 86            | 95            | 92            | 81            | 79            | 84            | 81 |
|               | 90            | 94            | 92            | 81            | 77            | 83            | 81 |
|               | 90            | 94            | 90            | 82            | 76            | 82            | 82 |
|               | 90            | 93            | 88            | 81            | 77            | 82            | 81 |
|               | 90            | 92            | 88            | 80            | 78            | 83            | 80 |
|               | 90            | 93            | 86            | 80            | 79            | 84            | 80 |
|               | 91            | 94            | 86            | 80            | 80            | 84            | 82 |
|               | 91            | 95            | 87            | 80            | 80            | 84            | 91 |

|    |    |    |    |    |    |    |
|----|----|----|----|----|----|----|
| 92 | 94 | 87 | 80 | 80 | 84 | 82 |
| 92 | 94 | 87 | 80 | 80 | 84 | 85 |
| 92 | 94 | 87 | 85 | 79 | 84 | 85 |
| 92 | 94 | 88 | 89 | 79 | 84 | 89 |
| 93 | 94 | 88 | 90 | 79 | 82 | 90 |
| 93 | 94 | 89 | 91 | 77 | 80 | 91 |
| 93 | 94 | 92 | 91 | 77 | 79 | 91 |
| 93 | 96 | 94 | 89 | 77 | 78 | 89 |
| 94 | 96 | 94 | 88 | 78 | 76 | 88 |
| 95 | 95 | 94 | 86 | 78 | 76 | 86 |
| 96 | 95 | 94 | 85 | 79 | 76 | 85 |
| 96 | 94 | 94 | 84 | 79 | 76 | 84 |
| 97 | 93 | 94 | 85 | 79 | 77 | 85 |
| 97 | 92 | 93 | 87 | 83 | 77 | 87 |
| 97 | 92 | 92 | 87 | 83 | 78 | 87 |
| 97 | 93 | 92 | 87 | 83 | 78 | 87 |
| 97 | 94 | 91 | 87 | 81 | 79 | 87 |
| 98 | 94 | 91 | 87 | 78 | 81 | 87 |
| 97 | 94 | 91 | 85 | 77 | 82 | 85 |
| 94 | 93 | 91 | 84 | 76 | 82 | 84 |
| 93 | 93 | 91 | 83 | 76 | 81 | 83 |
| 92 | 93 | 91 | 82 | 78 | 80 | 82 |
| 92 | 94 | 90 | 83 | 78 | 79 | 83 |
| 91 | 94 | 90 | 84 | 78 | 79 | 84 |
| 91 | 95 | 90 | 84 | 78 | 78 | 84 |
| 91 | 97 | 90 | 84 | 78 | 78 | 84 |
| 89 | 98 | 89 | 83 | 79 | 78 | 83 |
| 88 | 98 | 89 | 82 | 82 | 78 | 82 |
| 87 | 94 | 89 | 81 | 82 | 78 | 81 |
| 85 | 92 | 88 | 81 | 82 | 78 | 81 |
| 82 | 90 | 88 | 82 | 82 | 79 | 82 |
| 80 | 89 | 89 | 82 | 82 | 79 | 82 |
| 80 | 89 | 90 | 82 | 82 | 81 | 82 |
| 80 | 89 | 90 | 82 | 82 | 81 | 82 |
| 78 | 89 | 88 | 82 | 82 | 86 | 82 |
| 77 | 92 | 88 | 82 | 84 | 90 | 83 |
| 76 | 92 | 87 | 82 | 84 | 90 | 85 |
| 76 | 92 | 88 | 82 | 84 | 90 | 85 |
| 74 | 92 | 88 | 82 | 83 | 89 | 85 |
| 74 | 92 | 88 | 81 | 83 | 89 | 83 |
| 74 | 93 | 88 | 81 | 82 | 87 | 82 |
| 73 | 93 | 88 | 82 | 82 | 87 | 82 |
| 73 | 94 | 88 | 82 | 83 | 89 | 82 |
| 72 | 95 | 88 | 82 | 85 | 91 | 82 |
| 72 | 95 | 88 | 84 | 86 | 91 | 84 |
| 72 | 96 | 88 | 87 | 87 | 91 | 87 |
| 72 | 95 | 90 | 89 | 87 | 96 | 89 |
| 72 | 94 | 90 | 89 | 87 | 97 | 89 |
| 75 | 93 | 90 | 88 | 87 | 97 | 88 |
| 77 | 91 | 90 | 85 | 86 | 97 | 85 |

|    |    |    |    |    |    |    |
|----|----|----|----|----|----|----|
| 79 | 90 | 90 | 80 | 85 | 97 | 80 |
| 79 | 89 | 91 | 79 | 85 | 97 | 82 |
| 79 | 88 | 91 | 77 | 85 | 97 | 80 |
| 79 | 89 | 90 | 78 | 84 | 97 | 82 |
| 79 | 89 | 89 | 79 | 84 | 97 | 82 |
| 80 | 89 | 88 | 79 | 85 | 97 | 82 |
| 85 | 89 | 87 | 78 | 85 | 97 | 80 |
| 88 | 89 | 86 | 75 | 87 | 96 | 82 |
| 89 | 88 | 85 | 74 | 88 | 96 | 82 |
| 89 | 87 | 86 | 74 | 88 | 95 | 85 |
| 89 | 87 | 86 | 74 | 83 | 95 | 85 |
| 89 | 87 | 86 | 74 | 79 | 95 | 80 |
| 88 | 87 | 86 | 77 | 78 | 94 | 80 |
| 88 | 89 | 87 | 77 | 79 | 86 | 80 |
| 88 | 90 | 91 | 77 | 81 | 85 | 80 |
| 88 | 90 | 96 | 78 | 83 | 84 | 83 |
| 88 | 90 | 97 | 81 | 85 | 84 | 81 |
| 84 | 90 | 97 | 80 | 87 | 83 | 80 |
| 83 | 90 | 97 | 78 | 88 | 82 | 83 |
| 81 | 89 | 97 | 76 | 89 | 81 | 85 |
| 80 | 89 | 98 | 75 | 89 | 80 | 80 |
| 80 | 93 | 97 | 74 | 90 | 80 | 83 |
| 79 | 95 | 96 | 74 | 90 | 80 | 85 |
| 76 | 97 | 96 | 75 | 89 | 80 | 84 |
| 72 | 97 | 95 | 77 | 89 | 81 | 82 |
| 70 | 96 | 94 | 78 | 89 | 82 | 80 |
| 69 | 95 | 94 | 80 | 89 | 82 | 80 |
| 68 | 94 | 94 | 81 | 89 | 82 | 81 |
| 68 | 93 | 95 | 81 | 89 | 81 | 81 |
| 67 | 93 | 94 | 81 | 89 | 81 | 81 |
| 67 | 92 | 94 | 79 | 88 | 81 | 83 |
| 67 | 92 | 92 | 78 | 87 | 81 | 85 |
| 67 | 93 | 90 | 78 | 85 | 81 | 85 |
| 67 | 94 | 88 | 78 | 84 | 82 | 86 |
| 68 | 93 | 88 | 78 | 84 | 82 | 84 |
| 68 | 92 | 89 | 79 | 83 | 82 | 85 |
| 68 | 92 | 89 | 80 | 82 | 82 | 80 |
| 68 | 92 | 90 | 80 | 80 | 82 | 83 |
| 74 | 92 | 89 | 79 | 78 | 82 | 80 |
| 81 | 92 | 89 | 76 | 77 | 83 | 85 |
| 83 | 90 | 89 | 73 | 76 | 83 | 80 |
| 89 | 90 | 89 | 71 | 77 | 83 | 80 |
| 90 | 90 | 89 | 72 | 79 | 83 | 82 |
| 89 | 90 | 89 | 74 | 81 | 83 | 84 |
| 87 | 91 | 89 | 76 | 81 | 83 | 86 |
| 86 | 91 | 90 | 77 | 81 | 83 | 85 |
| 85 | 88 | 90 | 78 | 80 | 83 | 88 |
| 84 | 82 | 92 | 78 | 79 | 86 | 85 |
| 84 | 80 | 94 | 77 | 79 | 86 | 85 |
| 84 | 79 | 94 | 77 | 80 | 89 | 85 |

|    |    |     |    |    |    |    |
|----|----|-----|----|----|----|----|
| 85 | 79 | 94  | 77 | 81 | 89 | 84 |
| 86 | 79 | 94  | 77 | 84 | 91 | 85 |
| 86 | 79 | 94  | 78 | 88 | 91 | 80 |
| 86 | 79 | 95  | 79 | 90 | 91 | 83 |
| 86 | 81 | 95  | 80 | 91 | 92 | 81 |
| 86 | 83 | 96  | 81 | 91 | 95 | 81 |
| 86 | 83 | 100 | 82 | 91 | 97 | 82 |
| 86 | 84 | 101 | 82 | 91 | 97 | 82 |
| 86 | 84 | 101 | 81 | 91 | 97 | 81 |
| 85 | 85 | 100 | 80 | 91 | 96 | 80 |
| 85 | 86 | 99  | 78 | 90 | 96 | 84 |
| 85 | 90 | 98  | 78 | 90 | 94 | 85 |
| 85 | 95 | 97  | 77 | 91 | 87 | 83 |
| 84 | 97 | 96  | 77 | 91 | 83 | 83 |
| 89 | 97 | 95  | 77 | 91 | 81 | 83 |
| 92 | 95 | 93  | 77 | 90 | 79 | 83 |
| 96 | 94 | 92  | 77 | 90 | 78 | 83 |
| 97 | 93 | 92  | 78 | 90 | 78 | 85 |
| 97 | 93 | 92  | 78 | 90 | 79 | 86 |
| 97 | 93 | 92  | 79 | 90 | 79 | 85 |
| 97 | 93 | 92  | 79 | 91 | 82 | 85 |
| 97 | 93 | 92  | 80 | 90 | 88 | 80 |
| 97 | 91 | 92  | 80 | 91 | 88 | 80 |
| 88 | 91 | 92  | 81 | 92 | 90 | 81 |
| 88 | 92 | 92  | 82 | 92 | 91 | 82 |
| 86 | 93 | 92  | 85 | 92 | 92 | 85 |
| 84 | 86 | 92  | 88 | 92 | 92 | 88 |
| 83 | 81 | 92  | 91 | 93 | 92 | 91 |
| 83 | 79 | 92  | 92 | 94 | 92 | 92 |
| 86 | 78 | 91  | 93 | 94 | 92 | 93 |
| 86 | 79 | 90  | 92 | 94 | 91 | 92 |
| 88 | 81 | 90  | 91 | 94 | 89 | 91 |
| 88 | 83 | 89  | 91 | 94 | 88 | 91 |
| 89 | 84 | 88  | 91 | 96 | 88 | 91 |
| 89 | 84 | 88  | 91 | 96 | 88 | 91 |
| 89 | 84 | 87  | 91 | 96 | 89 | 91 |
| 89 | 86 | 87  | 90 | 94 | 90 | 90 |
| 89 | 86 | 86  | 90 | 93 | 90 | 90 |
| 89 | 86 | 86  | 88 | 91 | 90 | 88 |
| 89 | 86 | 86  | 86 | 91 | 91 | 86 |
| 89 | 86 | 85  | 84 | 89 | 93 | 84 |
| 89 | 86 | 83  | 82 | 87 | 92 | 82 |
| 91 | 87 | 83  | 82 | 87 | 90 | 82 |
| 92 | 88 | 84  | 82 | 90 | 89 | 82 |
| 92 | 89 | 85  | 83 | 92 | 89 | 83 |
| 92 | 89 | 86  | 82 | 92 | 90 | 82 |
| 92 | 89 | 87  | 82 | 90 | 91 | 82 |
| 92 | 89 | 87  | 83 | 87 | 94 | 83 |
| 92 | 89 | 87  | 83 | 84 | 95 | 83 |
| 91 | 89 | 87  | 83 | 84 | 96 | 83 |

|    |    |    |    |    |    |    |
|----|----|----|----|----|----|----|
| 91 | 89 | 87 | 83 | 85 | 96 | 83 |
| 91 | 90 | 84 | 83 | 87 | 97 | 83 |
| 91 | 73 | 84 | 83 | 89 | 97 | 83 |
| 91 | 71 | 83 | 84 | 89 | 96 | 84 |
| 91 | 69 | 84 | 84 | 88 | 95 | 84 |
| 90 | 68 | 84 | 84 | 86 | 92 | 84 |
| 89 | 67 | 84 | 84 | 84 | 88 | 84 |
| 88 | 66 | 84 | 85 | 83 | 85 | 85 |
| 88 | 65 | 85 | 89 | 83 | 84 | 89 |
| 89 | 61 | 85 | 93 | 82 | 84 | 93 |
| 90 | 61 | 85 | 93 | 82 | 85 | 93 |
| 90 | 54 | 85 | 90 | 83 | 85 | 90 |
| 90 | 53 | 85 | 88 | 83 | 85 | 88 |
| 90 | 52 | 85 | 87 | 83 | 86 | 87 |
| 89 | 52 | 85 | 87 | 83 | 87 | 87 |
| 87 | 56 | 85 | 87 | 83 | 88 | 87 |
| 87 | 57 | 84 | 88 | 83 | 88 | 88 |
| 87 | 61 | 84 | 88 | 83 | 88 | 88 |
| 87 | 63 | 84 | 88 | 87 | 88 | 88 |
| 87 | 67 | 83 | 90 | 86 | 87 | 90 |
| 88 | 68 | 83 | 90 | 82 | 85 | 90 |
| 90 | 68 | 71 | 90 | 80 | 84 | 90 |
| 91 | 69 | 67 | 78 | 80 | 84 | 84 |
| 92 | 70 | 66 | 73 | 82 | 84 | 85 |
| 92 | 73 | 65 | 73 | 84 | 85 | 83 |
| 91 | 74 | 63 | 75 | 86 | 87 | 85 |
| 90 | 74 |    | 76 | 87 | 88 | 86 |
| 90 | 74 |    | 76 | 87 | 89 | 86 |
| 89 | 74 |    | 77 | 87 | 89 | 87 |
| 89 | 74 |    | 78 | 85 | 89 | 86 |
| 89 | 74 |    | 80 | 85 | 87 | 80 |
| 89 | 74 |    | 81 | 85 | 86 | 81 |
| 88 | 74 |    | 82 | 85 | 85 | 82 |
| 88 | 74 |    | 81 | 86 | 83 | 81 |
| 88 | 74 |    | 80 | 87 | 81 | 80 |
| 87 | 74 |    | 80 | 87 | 80 | 80 |
| 88 | 75 |    | 80 | 87 | 81 | 80 |
| 89 | 75 |    | 80 | 87 | 81 | 80 |
| 89 | 75 |    | 80 | 90 | 82 | 80 |
| 89 | 74 |    | 80 | 91 | 82 | 80 |
| 89 | 74 |    | 80 | 90 | 81 | 80 |
| 89 | 74 |    | 89 | 87 | 80 | 89 |
| 89 | 73 |    | 90 | 84 | 80 | 90 |
| 89 | 73 |    | 89 | 82 | 80 | 89 |
| 89 | 73 |    | 86 | 81 | 79 | 86 |
| 90 | 73 |    | 84 | 81 | 79 | 84 |
| 92 | 74 |    | 83 | 82 | 79 | 83 |
| 92 | 75 |    | 82 | 83 | 79 | 82 |
| 92 | 75 |    | 83 | 84 | 79 | 83 |
| 92 | 75 |    | 83 | 84 | 84 | 83 |

|    |    |    |    |     |    |
|----|----|----|----|-----|----|
| 89 | 75 | 84 | 84 | 88  | 84 |
| 86 | 75 | 85 | 84 | 89  | 85 |
| 86 | 78 | 87 | 85 | 90  | 87 |
| 86 | 93 | 88 | 84 | 90  | 88 |
| 87 | 94 | 89 | 82 | 90  | 89 |
| 87 | 93 | 89 | 81 | 89  | 89 |
| 86 | 90 | 89 | 80 | 90  | 89 |
| 85 | 90 | 88 | 80 | 90  | 88 |
| 86 | 89 | 87 | 80 | 90  | 87 |
| 86 | 89 | 87 | 79 | 88  | 87 |
| 86 | 89 | 88 | 80 | 86  | 88 |
| 86 | 90 | 89 | 81 | 86  | 89 |
| 87 | 91 | 91 | 80 | 85  | 91 |
| 88 | 91 | 92 | 80 | 85  | 92 |
| 88 | 90 | 91 | 80 | 85  | 91 |
| 89 | 90 | 88 | 81 | 85  | 88 |
| 90 | 90 | 83 | 81 | 85  | 83 |
| 91 | 90 | 81 | 83 | 85  | 81 |
| 91 | 91 | 81 | 83 | 85  | 81 |
| 92 | 91 | 82 | 84 | 85  | 82 |
| 92 | 90 | 84 | 84 | 85  | 84 |
| 92 | 90 | 84 | 84 | 86  | 84 |
| 92 | 91 | 82 | 84 | 86  | 82 |
| 92 | 91 | 82 | 84 | 86  | 82 |
| 92 | 91 | 81 | 83 | 86  | 81 |
| 92 | 92 | 79 | 82 | 87  | 87 |
| 92 | 92 | 78 | 82 | 96  | 87 |
| 92 | 92 | 78 | 82 | 101 | 85 |
| 94 | 92 | 78 | 83 | 103 | 85 |
| 94 | 92 | 78 | 83 | 103 | 84 |
| 94 | 92 | 79 | 84 | 104 | 85 |
| 94 | 92 | 79 | 84 | 104 | 85 |
| 94 | 92 | 80 | 84 | 102 | 80 |
| 94 | 92 | 81 | 85 | 102 | 81 |
| 94 | 92 | 82 | 90 | 101 | 82 |
| 93 | 92 | 82 | 91 | 100 | 82 |
| 93 | 92 | 82 | 91 | 98  | 82 |
| 92 | 92 | 81 | 89 | 91  | 81 |
| 92 | 92 | 80 | 88 | 91  | 80 |
| 92 | 92 | 80 | 87 | 88  | 80 |
| 90 | 92 | 80 | 89 | 86  | 80 |
| 90 | 92 | 80 | 89 | 85  | 80 |
| 90 | 92 | 81 | 90 | 84  | 81 |
| 89 | 92 | 85 | 90 | 83  | 85 |
| 88 | 92 | 86 | 90 | 83  | 86 |
| 88 | 92 | 85 | 92 | 83  | 85 |
| 88 | 92 | 83 | 92 | 85  | 83 |
| 87 | 92 | 82 | 92 | 86  | 82 |
| 86 | 92 | 81 | 93 | 86  | 81 |
| 83 | 92 | 81 | 92 | 86  | 81 |

|    |    |    |    |     |    |
|----|----|----|----|-----|----|
| 80 | 92 | 82 | 90 | 86  | 82 |
| 78 | 92 | 82 | 90 | 86  | 82 |
| 78 | 92 | 84 | 90 | 86  | 84 |
| 78 | 93 | 84 | 90 | 86  | 84 |
| 77 | 93 | 84 | 90 | 86  | 84 |
| 77 | 94 | 85 | 91 | 86  | 85 |
| 77 | 94 | 86 | 92 | 87  | 86 |
| 76 | 94 | 86 | 94 | 87  | 86 |
| 76 | 94 | 86 | 96 | 89  | 86 |
| 76 | 94 | 86 | 98 | 89  | 86 |
| 76 | 94 | 87 | 98 | 90  | 87 |
| 91 | 94 | 87 | 98 | 89  | 87 |
| 94 | 93 | 86 | 98 | 87  | 86 |
| 95 | 93 | 85 | 98 | 86  | 85 |
| 95 | 92 | 86 | 97 | 85  | 86 |
| 95 | 92 | 85 | 96 | 84  | 85 |
| 95 | 92 | 85 | 95 | 83  | 85 |
| 95 | 92 | 85 | 94 | 83  | 85 |
| 95 | 91 | 84 | 92 | 83  | 84 |
| 95 | 91 | 85 | 92 | 83  | 85 |
| 95 | 91 | 86 | 91 | 81  | 86 |
| 95 | 90 | 85 | 90 | 80  | 85 |
| 95 | 90 | 84 | 90 | 79  | 84 |
| 92 | 91 | 84 | 90 | 79  | 84 |
| 91 | 91 | 84 | 85 | 78  | 84 |
| 90 | 91 | 84 | 84 | 79  | 84 |
| 89 | 92 | 84 | 81 | 79  | 84 |
| 89 | 92 | 84 | 79 | 79  | 84 |
| 89 | 92 | 87 | 79 | 79  | 87 |
| 89 | 92 | 92 | 79 | 79  | 92 |
| 89 | 92 | 92 | 80 | 80  | 92 |
| 89 | 92 | 91 | 80 | 81  | 91 |
| 89 | 92 | 89 | 80 | 80  | 89 |
| 90 | 92 | 87 | 80 | 81  | 87 |
| 90 | 92 | 87 | 80 | 82  | 87 |
| 91 | 92 | 87 | 82 | 83  | 87 |
| 89 | 92 | 87 | 82 | 85  | 87 |
| 87 | 92 | 87 | 82 | 85  | 87 |
| 87 | 92 | 86 | 82 | 87  | 86 |
| 87 | 92 | 89 | 82 | 90  | 89 |
| 86 | 91 | 88 | 82 | 91  | 88 |
| 86 | 90 | 86 | 82 | 93  | 86 |
| 86 | 90 | 84 | 81 | 95  | 84 |
| 87 | 90 | 83 | 81 | 98  | 83 |
| 87 | 90 | 83 | 81 | 98  | 83 |
| 87 | 92 | 83 | 78 | 100 | 83 |
| 88 | 92 | 82 | 77 | 100 | 82 |
| 88 | 91 | 83 | 77 | 99  | 83 |
| 89 | 91 | 84 | 80 | 89  | 84 |
| 89 | 91 | 87 | 80 | 83  | 87 |

|    |    |    |    |    |    |
|----|----|----|----|----|----|
| 89 | 91 | 87 | 79 | 80 | 87 |
| 89 | 91 | 87 | 77 | 79 | 87 |
| 89 | 91 | 82 | 77 | 77 | 82 |
| 90 | 91 | 77 | 76 | 77 | 86 |
| 91 | 91 | 73 | 76 | 76 | 84 |
| 91 | 91 | 71 | 76 | 75 | 84 |
| 94 | 91 | 70 | 76 | 75 | 84 |
| 94 | 92 | 71 | 75 | 75 | 88 |
| 94 | 92 | 71 | 75 | 76 | 65 |
| 92 | 92 | 71 | 75 | 76 | 87 |
| 88 | 91 | 71 | 75 | 78 | 88 |
| 88 | 89 | 71 | 75 | 78 | 85 |
| 87 | 88 | 72 | 75 | 78 | 85 |
| 87 | 87 | 72 | 75 | 79 | 84 |
| 84 | 87 | 74 | 75 | 79 | 85 |
| 79 | 87 | 75 | 76 | 81 | 85 |
| 77 | 86 | 75 | 76 | 82 | 85 |
| 77 | 86 | 75 | 78 | 84 | 85 |
| 77 | 86 | 76 | 79 | 84 | 86 |
| 76 | 86 | 79 | 80 | 86 | 85 |
| 75 | 86 | 80 | 80 | 87 | 80 |
| 74 | 86 | 78 | 81 | 87 | 84 |
| 74 | 86 | 77 | 83 | 85 | 86 |
| 74 | 84 | 76 | 83 | 82 | 85 |
| 76 | 82 | 76 | 84 | 81 | 85 |
| 82 | 82 | 76 | 88 | 81 | 85 |
| 84 | 82 | 76 | 88 | 81 | 85 |
| 85 | 82 | 77 | 91 | 83 | 86 |
| 86 | 82 | 77 | 92 | 83 | 85 |
| 87 | 82 | 77 | 95 | 83 | 85 |
| 88 | 82 | 76 | 97 | 82 | 86 |
| 88 | 85 | 74 | 98 | 82 | 84 |
| 88 | 86 | 75 | 98 | 81 | 87 |
| 88 | 86 | 75 | 97 | 80 | 86 |
| 88 | 86 | 80 | 97 | 80 | 80 |
| 88 | 86 | 82 | 96 | 81 | 82 |
| 88 | 84 | 84 | 95 | 84 | 84 |
| 88 | 86 | 84 | 91 | 85 | 84 |
| 88 | 88 | 85 | 89 | 84 | 85 |
| 88 | 89 | 87 | 89 | 83 | 87 |
| 90 | 90 | 88 | 87 | 83 | 88 |
| 91 | 90 | 93 | 85 | 84 | 93 |
| 92 | 87 | 94 | 85 | 84 | 91 |
| 92 | 84 | 94 | 84 | 85 | 91 |
| 92 | 83 | 94 | 84 | 86 | 91 |
| 92 | 82 | 93 | 84 | 85 | 93 |
| 92 | 82 | 80 | 84 | 84 | 80 |
| 92 | 82 | 75 | 84 | 82 | 86 |
| 92 | 85 | 74 | 85 | 81 | 85 |
| 92 | 86 | 74 | 85 | 81 | 85 |

|    |     |    |    |    |    |
|----|-----|----|----|----|----|
| 92 | 86  | 75 | 85 | 80 | 85 |
| 92 | 84  | 76 | 95 | 80 | 83 |
| 94 | 81  | 77 | 97 | 82 | 80 |
| 93 | 80  | 80 | 94 | 83 | 80 |
| 91 | 80  | 84 | 94 | 86 | 84 |
| 89 | 80  | 86 | 94 | 87 | 86 |
| 87 | 81  | 88 |    | 88 | 88 |
| 83 | 82  | 89 |    | 90 | 89 |
| 81 | 82  | 89 |    | 90 | 89 |
| 79 | 82  | 89 |    | 89 | 89 |
| 78 | 82  | 88 |    | 87 | 88 |
| 79 | 84  | 87 |    | 87 | 87 |
| 81 | 83  | 85 |    | 88 | 85 |
| 84 | 83  | 85 |    | 87 | 85 |
| 86 | 83  | 84 |    | 87 | 84 |
| 87 | 83  | 84 |    | 87 | 84 |
| 88 | 85  | 84 |    | 87 | 84 |
| 90 | 86  | 84 |    | 88 | 84 |
| 90 | 87  | 83 |    | 92 | 83 |
| 89 | 87  | 82 |    | 92 | 82 |
| 89 | 88  | 81 |    | 89 | 81 |
| 89 | 88  | 82 |    | 87 | 82 |
| 89 | 87  | 83 |    | 86 | 83 |
| 88 | 86  | 83 |    | 85 | 83 |
| 88 | 85  | 84 |    | 83 | 84 |
| 88 | 84  | 85 |    | 83 | 85 |
| 87 | 84  | 85 |    | 82 | 85 |
| 86 | 85  | 85 |    | 82 | 85 |
| 83 | 87  | 85 |    | 83 | 85 |
| 82 | 88  | 85 |    | 84 | 85 |
| 81 | 89  | 85 |    | 84 | 85 |
| 78 | 90  | 85 |    | 84 | 85 |
| 78 | 90  | 85 |    | 84 | 85 |
| 77 | 90  | 86 |    | 84 | 86 |
| 77 | 91  | 86 |    | 84 | 86 |
| 80 | 92  | 87 |    | 84 | 87 |
| 80 | 95  | 88 |    | 84 | 88 |
| 80 | 97  | 88 |    | 83 | 88 |
| 80 | 99  | 86 |    | 82 | 86 |
| 80 | 100 | 85 |    | 83 | 85 |
| 80 | 100 | 84 |    | 83 | 84 |
| 81 | 100 | 84 |    | 84 | 84 |
| 81 | 100 | 84 |    | 86 | 84 |
| 81 | 98  | 84 |    | 86 | 84 |
| 81 | 96  | 84 |    | 85 | 84 |
| 81 | 95  | 84 |    | 84 | 84 |
| 82 | 95  | 85 |    | 83 | 85 |
| 82 | 95  | 85 |    | 83 | 85 |
| 83 | 95  | 85 |    | 83 | 85 |
| 83 | 94  | 85 |    | 82 | 85 |

|    |    |    |    |    |
|----|----|----|----|----|
| 84 | 94 | 84 | 81 | 84 |
| 85 | 94 | 82 | 81 | 82 |
| 86 | 95 | 82 | 81 | 82 |
| 86 | 96 | 82 | 81 | 82 |
| 83 | 96 | 81 | 81 | 81 |
| 77 | 95 | 81 | 81 | 81 |
| 77 | 94 | 81 | 81 | 81 |
| 77 | 94 | 81 | 81 | 81 |
| 77 | 93 | 81 | 83 | 81 |
| 77 | 93 | 82 | 85 | 82 |
| 77 | 93 | 80 | 87 | 80 |
| 77 | 93 | 79 | 87 | 80 |
| 78 | 93 | 77 | 86 | 79 |
| 79 | 93 | 77 | 82 | 79 |
| 80 | 93 | 76 | 79 | 78 |
| 81 | 90 | 77 | 77 | 79 |
| 82 | 90 | 77 | 78 | 79 |
| 82 | 90 | 78 | 78 | 80 |
| 82 | 90 | 78 | 79 | 80 |
| 81 | 90 | 79 | 80 | 81 |
| 80 | 90 | 79 | 82 | 81 |
| 78 | 90 | 80 | 82 | 80 |
| 77 | 90 | 80 | 82 | 80 |
| 78 | 90 | 81 | 82 | 81 |
| 79 | 90 | 81 | 82 | 81 |
| 79 | 90 | 81 | 82 | 81 |
| 80 | 90 | 81 | 82 |    |
| 81 | 91 | 82 | 82 |    |
| 81 | 92 | 83 | 83 |    |
| 81 | 93 | 84 | 83 |    |
| 80 | 94 | 84 | 83 |    |
| 79 | 96 | 84 | 83 |    |
| 79 | 93 | 84 | 83 |    |
| 79 | 92 | 82 | 83 |    |
| 81 | 90 | 81 | 83 |    |
| 81 | 88 | 80 | 84 |    |
| 82 | 86 | 80 | 84 |    |
| 82 | 84 | 80 | 85 |    |
| 82 | 83 | 81 | 85 |    |
| 82 | 83 | 82 | 84 |    |
| 83 | 83 | 82 | 83 |    |
| 82 | 83 | 82 | 83 |    |
| 82 | 83 | 83 | 83 |    |
| 82 | 83 | 84 | 83 |    |
| 81 | 83 | 84 | 83 |    |
| 80 | 84 | 84 | 83 |    |
| 79 | 85 | 85 | 84 |    |
| 80 | 87 | 85 | 84 |    |
| 80 | 88 | 86 | 84 |    |
| 80 | 88 | 85 | 84 |    |

|     |    |     |    |
|-----|----|-----|----|
| 81  | 89 | 85  | 83 |
| 81  | 89 | 85  | 83 |
| 82  | 89 | 85  | 82 |
| 82  | 89 | 85  | 82 |
| 82  | 89 | 86  | 82 |
| 82  | 89 | 87  | 82 |
| 82  | 90 | 87  | 83 |
| 82  | 90 | 87  | 85 |
| 83  | 90 | 86  | 87 |
| 84  | 90 | 84  | 88 |
| 84  | 90 | 83  | 88 |
| 85  | 90 | 83  | 84 |
| 85  | 90 | 83  | 81 |
| 87  | 90 | 82  | 80 |
| 87  | 90 | 82  | 80 |
| 88  | 90 | 81  | 81 |
| 88  | 90 | 80  | 81 |
| 89  | 90 | 80  | 81 |
| 89  | 90 | 78  | 81 |
| 89  | 90 | 78  | 81 |
| 89  | 91 | 78  | 82 |
| 89  | 92 | 79  | 82 |
| 89  | 93 | 81  | 82 |
| 88  | 94 | 82  | 83 |
| 88  | 95 | 83  | 83 |
| 88  | 95 | 83  | 83 |
| 87  | 95 | 84  | 84 |
| 88  | 95 | 85  | 85 |
| 88  | 95 | 86  | 85 |
| 89  | 95 | 87  | 85 |
| 89  | 95 | 87  | 85 |
| 92  | 95 | 87  | 85 |
| 94  | 94 | 86  | 85 |
| 96  | 94 | 86  | 85 |
| 99  | 94 | 86  | 85 |
| 100 | 93 | 85  | 86 |
| 96  | 93 | 87  | 86 |
| 88  | 92 | 88  | 87 |
| 85  | 92 | 89  | 88 |
| 84  | 91 | 89  | 89 |
| 83  | 91 | 90  | 89 |
| 83  | 91 | 90  | 88 |
| 82  | 90 | 90  | 86 |
| 82  | 90 | 90  | 84 |
| 82  | 90 | 90  | 82 |
| 82  | 90 | 90  | 82 |
| 82  | 96 | 92  | 82 |
| 82  | 97 | 94  | 84 |
| 82  | 97 | 99  | 86 |
| 83  | 96 | 102 | 87 |

|    |     |     |    |
|----|-----|-----|----|
| 84 | 96  | 103 | 88 |
| 85 | 96  | 104 | 88 |
| 85 | 95  | 103 | 88 |
| 85 | 95  | 103 | 88 |
| 86 | 90  | 102 | 89 |
| 86 | 90  | 101 | 89 |
| 86 | 90  | 100 | 90 |
| 87 | 90  | 99  | 93 |
| 88 | 90  | 97  | 93 |
| 88 | 90  | 96  | 93 |
| 88 | 90  | 94  | 93 |
| 88 | 90  | 93  | 94 |
| 88 | 90  | 93  | 94 |
| 87 | 90  | 91  | 94 |
| 86 | 90  | 81  | 92 |
| 85 | 90  | 75  | 90 |
| 85 | 90  | 74  | 90 |
| 84 | 90  | 74  | 90 |
| 84 | 89  | 75  | 90 |
| 83 | 90  | 76  | 90 |
| 83 | 91  | 80  | 91 |
| 83 | 103 | 83  | 91 |
| 84 | 107 | 85  | 91 |
| 84 | 106 | 86  | 91 |
| 86 | 105 | 86  | 91 |
| 85 | 105 | 84  | 91 |
| 85 | 104 | 82  | 94 |
| 84 | 103 | 80  | 94 |
| 82 | 103 | 79  | 92 |
| 81 | 103 | 79  | 90 |
| 80 | 103 | 79  | 90 |
| 79 | 103 | 79  | 90 |
| 79 | 100 | 79  | 89 |
| 79 | 100 | 80  | 88 |
| 80 | 100 | 85  | 88 |
| 81 | 100 | 87  | 88 |
| 82 | 99  | 87  | 87 |
| 83 | 99  | 87  | 87 |
| 84 | 99  | 85  | 87 |
| 84 | 99  | 84  | 89 |
| 84 | 99  | 84  | 94 |
| 84 |     | 84  | 93 |
| 84 |     | 86  | 92 |
| 86 |     |     | 91 |
| 86 |     |     | 92 |
| 86 |     |     | 92 |
| 86 |     |     | 91 |
| 85 |     |     | 91 |
| 80 |     |     | 91 |
| 78 |     |     | 91 |

|    |    |
|----|----|
| 77 | 91 |
| 76 | 87 |
| 76 | 86 |
| 76 | 81 |
| 75 | 78 |
| 75 | 75 |
| 74 | 74 |
| 74 | 73 |
| 73 | 73 |
| 73 | 73 |
| 74 | 73 |
| 74 | 74 |
| 74 | 75 |
| 75 | 77 |
| 75 | 77 |
| 75 | 77 |
| 75 | 77 |
| 75 | 78 |
| 76 | 80 |
| 77 | 81 |
| 77 | 82 |
| 77 | 83 |
| 77 | 82 |
| 77 | 82 |
| 77 | 82 |
| 77 | 82 |
| 77 | 82 |
| 77 | 82 |
| 79 | 82 |
| 82 | 82 |
| 87 | 82 |
| 88 | 83 |
| 87 | 83 |
| 86 | 83 |
| 87 | 83 |
| 87 | 84 |
| 87 | 84 |
| 87 | 85 |
| 87 | 86 |
| 87 | 85 |
| 88 | 84 |
| 92 | 84 |
| 93 | 84 |
| 93 | 84 |
| 93 | 84 |
| 93 | 84 |
| 93 | 84 |
| 91 | 84 |
| 88 | 84 |
| 87 | 86 |

87  
87  
86  
86  
85  
85  
85  
85  
85  
84  
83  
84  
84  
84  
84  
84  
85  
86  
86  
87  
87  
87  
87  
87  
87  
88  
88  
88  
88  
89  
89  
89  
89  
89

86  
85  
84  
84  
84  
84  
86  
86  
86  
82  
75  
72  
72  
72  
72  
71













| usr#5<br>App2 | usr#5<br>App3 | usr#6<br>App1 | usr#6<br>App2 | usr#6<br>App3 | usr#7<br>App1 | usr#7<br>App2 |     |
|---------------|---------------|---------------|---------------|---------------|---------------|---------------|-----|
|               | 81            | 83            | 81            | 80            | 80            | 107           | 106 |
|               | 82            | 83            | 80            | 82            | 79            | 106           | 106 |
|               | 83            | 83            | 79            | 83            | 79            | 105           | 106 |
|               | 84            | 83            | 79            | 83            | 79            | 104           | 106 |
|               | 84            | 83            | 79            | 83            | 80            | 104           | 106 |
|               | 84            | 83            | 79            | 84            | 82            | 105           | 106 |
|               | 84            | 86            | 79            | 86            | 84            | 105           | 105 |
|               | 82            | 86            | 79            | 87            | 86            | 106           | 105 |
|               | 81            | 89            | 78            | 87            | 86            | 106           | 106 |
|               | 80            | 89            | 77            | 86            | 87            | 106           | 106 |
|               | 80            | 91            | 77            | 84            | 87            | 106           | 106 |
|               | 80            | 91            | 77            | 84            | 87            | 106           | 106 |
|               | 81            | 91            | 77            | 83            | 85            | 106           | 106 |
|               | 82            | 92            | 77            | 83            | 84            | 107           | 106 |
|               | 82            | 89            | 77            | 81            | 83            | 107           | 106 |
|               | 82            | 90            | 78            | 80            | 83            | 107           | 106 |
|               | 83            | 90            | 80            | 80            | 83            | 106           | 105 |
|               | 84            | 90            | 80            | 80            | 83            | 106           | 105 |
|               | 84            | 90            | 79            | 80            | 83            | 106           | 105 |
|               | 84            | 89            | 78            | 79            | 83            | 106           | 105 |
|               | 85            | 89            | 77            | 78            | 84            | 106           | 105 |
|               | 85            | 87            | 78            | 77            | 85            | 106           | 105 |
|               | 86            | 83            | 79            | 77            | 87            | 106           | 105 |
|               | 85            | 81            | 81            | 77            | 87            | 106           | 105 |
|               | 85            | 81            | 83            | 77            | 88            | 106           | 101 |
|               | 85            | 80            | 84            | 76            | 88            | 107           | 99  |
|               | 85            | 80            | 84            | 76            | 88            | 107           | 99  |
|               | 85            | 80            | 83            | 76            | 88            | 107           | 98  |
|               | 86            | 80            | 83            | 76            | 88            | 107           | 98  |
|               | 87            | 82            | 81            | 77            | 87            | 107           | 98  |
|               | 87            | 88            | 80            | 78            | 86            | 108           | 99  |
|               | 87            | 88            | 79            | 78            | 86            | 109           | 101 |
|               | 86            | 90            | 79            | 78            | 86            | 108           | 101 |
|               | 84            | 91            | 78            | 78            | 86            | 108           | 101 |
|               | 83            | 92            | 78            | 78            | 86            | 108           | 101 |
|               | 83            | 92            | 78            | 77            | 84            | 107           | 101 |
|               | 83            | 92            | 78            | 80            | 84            | 107           | 98  |
|               | 82            | 92            | 78            | 80            | 83            | 106           | 97  |
|               | 82            | 92            | 78            | 81            | 82            | 107           | 97  |
|               | 81            | 91            | 79            | 82            | 81            | 107           | 97  |
|               | 80            | 89            | 80            | 82            | 80            | 107           | 97  |
|               | 80            | 88            | 78            | 81            | 79            | 107           | 97  |
|               | 80            | 88            | 77            | 81            | 77            | 106           | 98  |
|               | 80            | 88            | 76            | 81            | 75            | 106           | 98  |
|               | 80            | 89            | 76            | 81            | 74            | 106           | 99  |
|               | 80            | 90            | 76            | 79            | 74            | 106           | 100 |
|               | 81            | 90            | 76            | 78            | 75            | 106           | 102 |
|               | 82            | 90            | 76            | 77            | 78            | 106           | 102 |

|     |    |    |    |    |     |     |
|-----|----|----|----|----|-----|-----|
| 83  | 91 | 77 | 77 | 79 | 105 | 103 |
| 83  | 93 | 78 | 76 | 79 | 105 | 103 |
| 84  | 92 | 78 | 75 | 79 | 105 | 102 |
| 85  | 90 | 79 | 74 | 81 | 105 | 102 |
| 86  | 89 | 79 | 75 | 82 | 105 | 102 |
| 87  | 89 | 78 | 76 | 82 | 105 | 102 |
| 87  | 90 | 78 | 77 | 82 | 105 | 102 |
| 87  | 91 | 77 | 77 | 82 | 104 | 101 |
| 86  | 88 | 77 | 78 | 83 | 102 | 101 |
| 86  | 89 | 78 | 78 | 85 | 102 | 103 |
| 86  | 89 | 77 | 77 | 85 | 102 | 103 |
| 85  | 88 | 77 | 77 | 85 | 101 | 103 |
| 87  | 88 | 77 | 78 | 86 | 100 | 103 |
| 88  | 88 | 77 | 79 | 87 | 100 | 103 |
| 89  | 89 | 77 | 81 | 88 | 99  | 103 |
| 89  | 89 | 78 | 82 | 88 | 98  | 103 |
| 90  | 92 | 79 | 82 | 88 | 97  | 101 |
| 90  | 88 | 80 | 82 | 88 | 97  | 100 |
| 90  | 85 | 84 | 83 | 87 | 97  | 100 |
| 90  | 84 | 86 | 84 | 87 | 96  | 101 |
| 90  | 84 | 88 | 85 | 87 | 95  | 102 |
| 90  | 85 | 88 | 83 | 88 | 94  | 102 |
| 92  | 85 | 87 | 83 | 87 | 93  | 102 |
| 91  | 85 | 85 | 83 | 86 | 93  | 102 |
| 96  | 86 | 84 | 82 | 85 | 93  | 103 |
| 101 | 87 | 84 | 82 | 84 | 93  | 103 |
| 101 | 88 | 83 | 82 | 83 | 93  | 103 |
| 101 | 88 | 82 | 82 | 81 | 92  | 102 |
| 101 | 88 | 82 | 82 | 80 | 96  | 102 |
| 101 | 88 | 82 | 82 | 80 | 98  | 103 |
| 101 | 87 | 81 | 80 | 80 | 99  | 103 |
| 101 | 85 | 81 | 80 | 80 | 99  | 103 |
| 97  | 84 | 81 | 80 | 80 | 99  | 104 |
| 96  | 84 | 81 | 80 | 81 | 99  | 104 |
| 95  | 84 | 81 | 80 | 81 | 99  | 104 |
| 93  | 85 | 81 | 80 | 81 | 99  | 103 |
| 91  | 87 | 81 | 81 | 81 | 99  | 102 |
| 93  | 88 | 81 | 81 | 81 | 99  | 101 |
| 93  | 89 | 83 | 81 | 80 | 99  | 102 |
| 91  | 89 | 82 | 81 | 79 | 99  | 102 |
| 81  | 89 | 82 | 81 | 78 | 99  | 103 |
| 77  | 87 | 82 | 85 | 76 | 99  | 102 |
| 80  | 86 | 82 | 86 | 76 | 98  | 102 |
| 84  | 85 | 82 | 86 | 75 | 98  | 101 |
| 85  | 83 | 82 | 85 | 74 | 98  | 101 |
| 86  | 81 | 82 | 84 | 73 | 99  | 100 |
| 80  | 80 | 82 | 84 | 76 | 99  | 100 |
| 83  | 81 | 83 | 85 | 76 | 100 | 99  |
| 85  | 81 | 84 | 85 | 78 | 100 | 100 |
| 86  | 82 | 84 | 85 | 78 | 100 | 101 |

|    |     |    |    |    |     |     |
|----|-----|----|----|----|-----|-----|
| 86 | 82  | 83 | 84 | 78 | 100 | 101 |
| 84 | 81  | 82 | 83 | 79 | 101 | 102 |
| 82 | 80  | 81 | 83 | 80 | 101 | 102 |
| 80 | 80  | 81 | 82 | 80 | 101 | 101 |
| 85 | 80  | 81 | 82 | 80 | 101 | 101 |
| 86 | 80  | 81 | 82 | 81 | 101 | 100 |
| 86 | 82  | 82 | 81 | 82 | 102 | 100 |
| 88 | 82  | 82 | 81 | 81 | 102 | 100 |
| 85 | 83  | 81 | 81 | 81 | 102 | 99  |
| 80 | 84  | 80 | 82 | 81 | 103 | 96  |
| 85 | 84  | 80 | 82 | 81 | 103 | 94  |
| 87 | 88  | 80 | 83 | 81 | 102 | 93  |
| 87 | 89  | 80 | 84 | 80 | 102 | 92  |
| 87 | 90  | 81 | 85 | 80 | 102 | 92  |
| 85 | 90  | 81 | 87 | 80 | 101 | 91  |
| 84 | 90  | 81 | 87 | 80 | 101 | 90  |
| 84 | 89  | 81 | 86 | 80 | 103 | 88  |
| 84 | 90  | 81 | 84 | 80 | 104 | 88  |
| 86 | 90  | 79 | 82 | 80 | 104 | 88  |
| 88 | 90  | 78 |    | 79 | 104 | 90  |
| 90 | 88  | 77 |    |    | 103 | 94  |
| 91 | 86  | 77 |    |    | 103 | 98  |
| 90 | 86  | 78 |    |    | 104 | 100 |
| 88 | 85  | 77 |    |    | 104 | 101 |
| 83 | 85  | 76 |    |    | 105 | 101 |
| 81 | 85  | 76 |    |    | 105 | 101 |
| 86 | 85  | 77 |    |    | 105 | 101 |
| 84 | 85  | 76 |    |    | 104 | 101 |
| 84 | 85  | 76 |    |    | 104 | 101 |
| 85 | 85  | 75 |    |    | 104 | 101 |
| 85 | 85  | 74 |    |    | 104 | 101 |
| 80 | 85  | 75 |    |    | 104 | 102 |
| 82 | 86  | 76 |    |    | 104 | 102 |
| 86 | 86  | 78 |    |    | 103 | 102 |
| 89 | 86  | 78 |    |    | 103 | 102 |
| 89 | 86  | 78 |    |    | 103 | 102 |
| 89 | 87  | 78 |    |    | 103 | 102 |
| 89 | 96  | 78 |    |    | 104 | 102 |
| 89 | 101 | 78 |    |    | 104 | 102 |
| 89 | 101 | 77 |    |    | 104 | 101 |
| 89 | 101 | 77 |    |    | 104 | 101 |
| 89 | 101 | 78 |    |    | 104 | 101 |
| 89 | 101 | 78 |    |    | 104 | 101 |
| 90 | 101 | 79 |    |    | 105 | 101 |
| 91 | 101 | 79 |    |    | 105 | 101 |
| 93 | 101 | 79 |    |    | 105 | 100 |
| 92 | 98  | 80 |    |    | 105 | 99  |
| 92 | 95  | 80 |    |    | 105 | 98  |
| 92 | 91  | 80 |    |    | 105 | 98  |
| 91 | 91  | 80 |    |    | 105 | 98  |

|    |    |    |     |     |
|----|----|----|-----|-----|
| 91 | 88 | 80 | 106 | 101 |
| 90 | 86 | 80 | 105 | 103 |
| 91 | 85 | 79 | 105 | 102 |
| 91 |    | 78 | 105 | 101 |
| 91 |    | 77 | 105 | 100 |
| 91 |    | 77 | 106 | 99  |
| 93 |    | 77 | 106 | 100 |
| 93 |    | 77 | 106 | 99  |
| 87 |    | 78 | 107 | 99  |
| 84 |    | 79 | 107 | 100 |
| 83 |    | 79 | 107 | 101 |
| 82 |    | 80 | 107 | 101 |
| 82 |    | 79 | 107 | 100 |
| 83 |    | 78 | 107 | 99  |
| 84 |    | 78 | 107 | 99  |
| 84 |    | 78 | 106 | 99  |
| 84 |    | 79 | 106 | 100 |
| 84 |    | 79 | 105 | 99  |
| 84 |    | 78 | 106 | 99  |
| 84 |    | 78 | 107 | 100 |
| 84 |    | 78 | 107 | 100 |
| 82 |    | 79 | 107 | 100 |
| 80 |    | 79 | 107 | 101 |
| 85 |    | 80 | 106 | 101 |
| 86 |    | 80 | 106 | 101 |
| 86 |    | 80 | 106 | 101 |
| 87 |    | 81 | 106 | 101 |
| 86 |    | 81 | 106 | 100 |
| 86 |    | 80 | 107 | 100 |
| 86 |    | 79 | 107 | 100 |
| 79 |    | 80 | 107 | 100 |
| 80 |    | 81 | 107 | 99  |
| 80 |    | 82 | 106 | 99  |
| 81 |    | 82 | 106 | 98  |
| 81 |    | 82 | 105 | 98  |
| 82 |    | 82 | 104 | 98  |
| 82 |    | 83 | 103 | 97  |
| 81 |    | 85 | 103 | 98  |
| 80 |    | 86 | 103 | 98  |
| 81 |    | 87 | 104 | 99  |
| 81 |    | 87 | 105 | 99  |
| 80 |    | 88 | 105 | 100 |
| 80 |    | 88 | 105 | 100 |
| 80 |    | 88 | 105 | 99  |
| 80 |    | 88 | 105 | 99  |
| 80 |    | 88 | 105 |     |
| 80 |    | 89 | 105 |     |
| 81 |    | 86 | 105 |     |
| 81 |    | 85 | 105 |     |
| 81 |    | 85 | 104 |     |

|    |    |     |
|----|----|-----|
| 81 | 84 | 104 |
| 86 | 83 | 103 |
| 90 | 82 | 102 |
| 90 | 81 | 102 |
| 90 | 80 | 101 |
| 89 | 79 | 101 |
| 89 | 79 | 101 |
| 87 | 78 | 101 |
| 87 | 76 | 101 |
| 89 | 75 | 103 |
| 91 | 75 | 104 |
| 91 | 74 | 104 |
| 91 | 74 | 104 |
| 93 | 74 | 103 |
| 93 | 74 | 101 |
| 94 | 75 | 101 |
| 92 | 76 | 100 |
| 92 | 76 | 101 |
| 92 | 76 | 101 |
| 92 | 76 | 102 |
| 92 | 76 | 103 |
| 92 | 76 | 103 |
| 90 | 76 | 103 |
| 89 | 78 | 103 |
| 89 | 79 | 103 |
| 89 | 79 | 102 |
| 90 | 78 | 102 |
| 90 | 79 | 102 |
| 90 | 79 | 102 |
| 90 | 80 | 102 |
| 86 | 80 | 101 |
| 85 | 81 | 101 |
| 84 | 82 | 100 |
| 84 | 82 | 100 |
| 83 | 81 | 100 |
| 82 | 81 | 99  |
| 81 | 81 | 99  |
| 80 | 82 | 98  |
| 80 | 83 | 98  |
| 80 | 85 | 98  |
| 80 | 87 | 99  |
| 81 | 87 | 99  |
| 82 | 87 | 100 |
| 82 | 88 | 100 |
| 82 | 85 | 100 |
| 81 | 85 | 100 |
| 81 | 85 | 100 |
| 81 | 84 | 100 |
| 81 | 82 | 100 |
| 81 | 81 | 100 |

|    |    |     |
|----|----|-----|
| 82 | 81 | 100 |
| 82 | 81 | 100 |
| 82 | 81 | 100 |
| 82 | 81 | 100 |
| 82 | 81 | 101 |
| 82 | 81 | 102 |
| 83 | 81 | 103 |
| 83 | 82 | 103 |
|    | 82 | 103 |
|    | 82 | 104 |
|    | 82 | 103 |
|    | 82 | 103 |
|    | 81 | 103 |
|    | 81 | 103 |
|    | 81 | 103 |
|    | 80 | 102 |
|    | 79 | 102 |
|    | 79 | 102 |
|    | 79 | 102 |
|    | 79 | 102 |
|    | 79 | 101 |
|    | 80 | 102 |
|    | 81 | 104 |
|    | 81 | 105 |
|    | 81 | 105 |
|    | 81 | 105 |
|    | 81 | 105 |
|    | 81 | 105 |
|    | 80 | 105 |
|    | 79 | 105 |
|    | 79 | 105 |
|    | 79 | 106 |
|    | 79 | 107 |
|    | 80 | 107 |
|    | 80 | 107 |
|    | 80 | 107 |
|    | 79 | 107 |
|    | 79 | 107 |
|    | 78 | 107 |
|    | 77 | 107 |
|    | 77 | 105 |
|    | 77 | 104 |
|    | 76 | 102 |
|    | 75 | 101 |
|    | 75 | 101 |
|    | 76 | 102 |
|    | 78 | 102 |
|    | 79 | 101 |
|    | 80 | 100 |
|    | 80 | 100 |

|    |     |
|----|-----|
| 80 | 100 |
| 80 | 100 |
| 80 | 100 |
| 78 | 101 |
| 77 | 100 |
| 77 | 100 |
| 77 | 100 |
| 76 | 100 |
| 76 | 101 |
| 76 | 101 |
| 76 | 101 |
| 75 | 101 |
| 74 | 101 |
| 74 | 101 |
| 74 | 101 |
| 74 | 101 |
| 74 | 100 |
| 74 | 100 |
| 76 | 100 |
| 76 | 100 |
| 76 | 100 |
| 77 | 99  |
| 77 | 99  |
| 80 | 100 |
| 81 | 100 |
| 81 | 100 |
| 81 | 100 |
| 82 | 100 |
| 82 | 100 |
| 82 | 100 |
| 82 | 100 |
| 83 | 101 |
| 89 | 101 |
| 88 | 100 |
| 85 | 99  |
| 83 | 100 |
| 82 | 99  |
| 82 | 99  |
| 84 | 99  |
| 84 | 99  |
| 84 | 99  |
| 81 | 99  |
| 76 | 99  |
| 73 | 99  |
| 72 | 99  |
| 72 | 99  |
| 72 | 99  |
| 69 | 99  |
| 68 | 99  |
| 70 | 99  |

|    |     |
|----|-----|
| 71 | 100 |
| 72 | 101 |
| 72 | 101 |
| 75 | 102 |
| 76 | 102 |
| 78 | 103 |
| 79 | 104 |
| 82 | 104 |
| 82 | 105 |
| 82 | 105 |
| 82 | 105 |
| 82 | 105 |
| 82 | 105 |
| 82 | 105 |
| 82 | 105 |
| 82 | 103 |
| 83 | 103 |
| 83 | 103 |
|    | 103 |
|    | 104 |
|    | 103 |
|    | 103 |
|    | 103 |
|    | 102 |
|    | 102 |
|    | 105 |

























| usr#7<br>App3 | usr#8<br>App1 | usr#8<br>App2 | usr#8<br>App3 | usr#9<br>App1 | usr#9<br>App2 | usr#9<br>App3 |    |
|---------------|---------------|---------------|---------------|---------------|---------------|---------------|----|
|               | 99            | 70            | 67            | 65            | 66            | 66            | 86 |
|               | 98            | 70            | 67            | 66            | 66            | 66            | 86 |
|               | 98            | 70            | 67            | 67            | 66            | 65            | 86 |
|               | 98            | 69            | 67            | 67            | 66            | 65            | 86 |
|               | 99            | 68            | 68            | 67            | 66            | 65            | 87 |
|               | 99            | 68            | 69            | 68            | 67            | 64            | 87 |
|               | 100           | 68            | 69            | 68            | 68            | 64            | 87 |
|               | 100           | 69            | 68            | 68            | 70            | 64            | 87 |
|               | 101           | 69            | 66            | 68            | 71            | 65            | 87 |
|               | 101           | 69            | 65            | 68            | 72            | 66            | 87 |
|               | 101           | 68            | 64            | 68            | 72            | 67            | 86 |
|               | 100           | 67            | 64            | 68            | 71            | 69            | 85 |
|               | 99            | 66            | 65            | 68            | 70            | 70            | 83 |
|               | 98            | 66            | 66            | 67            | 69            | 72            | 80 |
|               | 98            | 66            | 67            | 67            | 69            | 73            | 81 |
|               | 98            | 67            | 68            | 68            | 69            | 74            | 82 |
|               | 98            | 67            | 69            | 68            | 69            | 76            | 83 |
|               | 99            | 68            | 68            | 67            | 69            | 78            | 84 |
|               | 99            | 68            | 68            | 67            | 72            | 80            | 85 |
|               | 99            | 67            | 68            | 67            | 73            | 81            | 85 |
|               | 99            | 66            | 68            | 67            | 73            | 81            | 85 |
|               | 99            | 66            | 68            | 67            | 72            | 71            | 86 |
|               | 99            | 66            | 68            | 66            | 70            | 70            | 86 |
|               | 100           | 67            | 68            | 67            | 69            | 70            | 86 |
|               | 101           | 68            | 68            | 67            | 66            | 70            | 85 |
|               | 101           | 69            | 68            | 67            | 65            | 70            | 77 |
|               | 101           | 69            | 68            | 67            | 65            | 70            | 73 |
|               | 101           | 68            | 68            | 68            | 65            | 70            | 71 |
|               | 101           | 65            | 68            | 68            | 65            | 70            | 70 |
|               | 101           | 64            | 68            | 68            | 65            | 70            | 70 |
|               | 101           | 63            | 67            | 68            | 65            | 70            | 71 |
|               | 101           | 62            | 67            | 69            | 65            | 70            | 71 |
|               | 100           | 61            | 67            | 69            | 65            | 72            | 70 |
|               | 100           | 61            | 66            | 69            | 65            | 73            | 69 |
|               | 99            | 62            | 66            | 70            | 65            | 73            | 71 |
|               | 100           | 63            | 66            | 70            | 65            | 74            | 71 |
|               | 101           | 63            | 66            | 70            | 66            | 73            | 72 |
|               | 102           | 63            | 68            | 70            | 66            | 73            | 70 |
|               | 102           | 64            | 69            | 70            | 67            | 73            | 70 |
|               | 102           | 64            | 70            | 70            | 67            | 72            | 70 |
|               | 102           | 64            | 71            | 70            | 68            | 72            | 70 |
|               | 102           | 66            | 70            | 69            | 69            | 70            | 69 |
|               | 102           | 67            | 70            | 69            | 70            | 70            | 69 |
|               | 103           | 67            | 70            | 69            | 71            | 70            | 69 |
|               | 103           | 68            | 70            | 69            | 70            | 69            | 69 |
|               | 104           | 70            | 71            | 69            | 70            | 69            | 69 |
|               | 104           | 71            | 71            | 69            | 70            | 70            | 69 |
|               | 104           | 72            | 72            | 69            | 70            | 70            | 69 |

|     |    |    |    |    |    |    |
|-----|----|----|----|----|----|----|
| 104 | 71 | 72 | 69 | 70 | 69 | 68 |
| 103 | 70 | 72 | 69 | 70 | 69 | 68 |
| 103 | 70 | 72 | 70 | 72 | 69 | 68 |
| 103 | 69 | 72 | 71 | 74 | 69 | 68 |
| 102 | 69 | 70 | 71 | 74 | 69 | 68 |
| 102 | 69 | 69 | 72 | 76 | 67 | 69 |
| 101 | 69 | 70 | 73 | 76 | 65 | 69 |
| 101 | 69 | 71 | 74 | 77 | 65 | 69 |
| 102 | 68 | 70 | 74 | 77 | 64 | 68 |
| 101 | 67 | 70 | 74 | 80 | 63 | 68 |
| 101 | 65 | 68 | 71 | 83 | 62 | 67 |
| 101 | 65 | 66 | 71 | 84 | 61 | 67 |
| 101 | 65 | 65 | 70 | 84 | 62 | 67 |
| 101 | 65 | 64 | 69 | 84 | 62 | 67 |
| 100 | 65 | 65 | 69 | 85 | 62 | 67 |
| 101 | 65 | 66 | 68 | 86 | 62 | 66 |
| 100 | 65 | 66 | 68 | 86 | 62 | 67 |
| 99  | 64 | 66 | 68 | 85 | 62 | 67 |
| 99  | 63 | 66 | 68 | 85 | 62 | 67 |
| 98  | 63 | 66 | 68 | 85 | 62 | 67 |
| 98  | 62 | 66 | 67 | 85 | 62 | 67 |
| 98  | 62 | 66 | 68 | 85 | 62 | 67 |
| 99  | 63 | 67 | 69 | 85 | 63 | 68 |
| 99  | 63 | 67 | 70 | 85 | 63 | 67 |
| 100 | 64 | 68 | 69 | 85 | 63 | 68 |
| 100 | 64 | 68 | 68 | 85 | 60 | 68 |
| 99  | 64 | 67 | 68 | 85 | 59 | 67 |
| 99  | 65 | 67 | 67 | 85 | 58 | 67 |
| 99  | 66 | 66 | 67 | 85 | 57 | 67 |
| 99  | 67 | 66 | 67 | 85 | 51 | 68 |
| 100 | 69 | 66 | 67 | 85 | 51 | 68 |
| 101 | 69 | 67 | 68 | 85 | 51 | 69 |
| 101 | 69 | 68 | 68 | 85 | 50 | 70 |
| 102 | 68 | 68 | 68 | 84 | 55 | 71 |
| 102 | 67 | 67 | 69 | 84 | 56 | 71 |
| 102 | 67 | 67 | 69 | 84 | 59 | 71 |
| 102 | 67 | 66 | 68 | 83 | 62 | 71 |
| 102 | 67 | 66 | 67 | 83 | 65 | 70 |
| 102 | 67 | 66 | 66 | 83 | 66 | 70 |
| 102 | 67 | 66 | 65 | 82 | 67 | 70 |
| 103 | 67 | 66 | 64 | 79 | 67 | 70 |
| 103 | 67 | 66 | 63 | 77 | 67 | 70 |
| 104 | 67 | 66 | 64 | 76 | 67 | 70 |
| 104 | 67 | 66 | 65 | 75 | 67 | 70 |
| 104 | 66 | 67 | 65 | 75 | 67 | 71 |
| 104 | 66 | 67 | 67 | 75 | 67 | 71 |
| 104 | 66 | 67 | 67 | 74 | 67 | 71 |
| 104 | 66 | 68 | 67 | 74 | 67 | 69 |
| 104 | 66 | 68 | 67 | 75 | 68 | 68 |
| 104 | 66 | 68 | 66 | 75 | 68 | 68 |

|     |    |    |    |    |    |    |
|-----|----|----|----|----|----|----|
| 104 | 66 | 68 | 66 | 77 | 68 | 68 |
| 104 | 66 | 68 | 66 | 76 | 67 | 68 |
| 104 | 66 | 69 | 66 | 77 | 66 | 68 |
| 105 | 67 | 69 | 66 | 77 | 67 | 69 |
| 105 | 67 | 69 | 67 | 78 | 67 | 69 |
| 107 | 67 | 69 | 67 | 78 | 66 | 69 |
| 108 | 68 | 69 | 67 | 78 | 66 | 69 |
| 110 | 67 | 69 | 67 | 78 | 66 | 69 |
|     | 67 | 69 | 67 | 78 | 64 | 70 |
|     | 65 | 69 | 67 | 78 | 64 | 71 |
|     | 65 | 68 | 67 | 78 | 64 | 72 |
|     | 65 | 68 | 67 | 80 | 64 | 72 |
|     | 65 | 68 | 67 | 80 | 64 | 72 |
|     | 66 | 68 | 67 | 79 | 64 | 72 |
|     | 66 | 68 | 67 | 79 | 64 | 73 |
|     | 66 | 68 | 67 | 77 | 64 | 74 |
|     | 67 | 68 | 67 | 76 | 63 | 74 |
|     | 67 | 68 | 68 | 75 | 62 | 74 |
|     | 67 | 68 | 68 | 75 | 61 | 74 |
|     | 67 | 68 | 68 | 75 | 60 | 72 |
|     | 66 | 68 | 69 | 75 | 60 | 71 |
|     | 66 | 68 | 70 | 75 | 60 | 71 |
|     | 66 | 68 | 69 | 73 | 60 | 72 |
|     | 66 | 68 | 69 | 73 | 61 | 72 |
|     | 66 | 68 | 70 | 73 | 61 | 72 |
|     | 66 | 68 | 71 | 73 | 61 | 72 |
|     | 66 | 68 | 71 | 73 | 62 | 73 |
|     | 66 | 68 | 71 | 74 | 62 | 74 |
|     | 65 | 68 | 72 | 73 | 62 | 74 |
|     | 65 | 68 | 72 | 72 | 62 | 75 |
|     | 65 | 69 | 71 | 71 | 61 | 75 |
|     | 65 | 69 | 71 | 68 | 61 | 75 |
|     | 65 | 69 | 70 | 68 | 61 | 76 |
|     | 67 | 68 | 70 | 67 | 61 | 78 |
|     | 67 | 68 | 70 | 67 | 61 | 78 |
|     | 67 | 68 | 69 | 68 | 59 | 80 |
|     | 67 | 67 | 69 | 68 | 59 | 80 |
|     | 67 | 68 | 69 | 68 | 60 | 80 |
|     | 67 | 68 | 69 | 68 | 60 | 80 |
|     | 67 | 67 | 68 | 68 | 60 | 80 |
|     | 66 | 65 | 68 | 67 | 61 | 80 |
|     | 66 | 65 | 68 | 66 | 61 | 80 |
|     | 66 | 64 | 68 | 66 | 60 | 80 |
|     | 67 | 64 | 67 | 66 | 62 | 80 |
|     | 67 | 63 | 67 | 66 | 62 | 81 |
|     | 67 | 64 | 67 | 66 | 63 | 82 |
|     | 68 | 65 | 67 | 66 | 64 | 82 |
|     | 68 | 65 | 67 | 66 | 65 | 82 |
|     | 69 | 65 | 66 | 66 | 67 | 82 |
|     | 69 | 65 | 66 | 66 | 68 | 83 |

|    |    |    |    |    |    |
|----|----|----|----|----|----|
| 69 | 65 | 67 | 66 | 69 | 85 |
| 70 | 65 | 67 | 66 | 70 | 85 |
| 72 | 66 | 67 | 66 | 69 | 85 |
| 72 | 67 | 67 | 67 | 69 | 85 |
| 72 | 68 | 67 | 68 | 69 | 85 |
| 72 | 69 | 67 | 71 | 69 | 85 |
| 72 | 69 | 67 | 73 | 69 | 85 |
| 72 | 68 | 69 | 73 | 69 | 84 |
| 72 | 68 | 72 | 73 | 69 | 82 |
| 73 | 67 | 73 | 73 | 70 | 82 |
| 73 | 67 | 73 | 73 | 71 | 82 |
| 74 | 68 | 73 | 74 | 72 | 81 |
| 74 | 68 | 74 | 74 | 71 | 80 |
| 74 | 68 | 73 | 76 | 70 | 79 |
| 72 | 69 | 72 | 73 | 70 | 79 |
| 71 | 69 | 71 | 72 | 69 | 78 |
| 70 | 69 | 71 | 72 | 69 | 76 |
| 70 | 69 | 71 | 72 | 67 | 75 |
| 70 | 69 | 72 | 73 | 66 | 75 |
| 70 | 69 | 73 | 73 | 66 | 73 |
| 70 | 69 | 73 | 74 | 66 | 73 |
| 70 | 69 | 73 | 74 | 66 | 73 |
| 70 | 69 | 73 | 74 | 66 | 72 |
| 69 | 68 | 71 | 74 | 67 | 72 |
| 67 | 68 | 69 | 75 | 68 | 74 |
| 66 | 70 | 68 | 75 | 68 | 75 |
| 65 | 71 | 68 | 75 | 68 | 75 |
| 65 | 72 | 68 | 76 | 68 | 75 |
| 66 | 73 | 68 | 77 | 68 | 76 |
| 68 | 74 | 68 | 77 | 68 | 76 |
| 68 | 75 | 68 | 77 | 65 | 76 |
| 68 | 75 | 69 | 77 | 65 | 73 |
| 68 | 74 | 69 | 76 | 67 | 73 |
| 69 | 74 | 69 | 76 | 69 | 72 |
| 71 | 73 | 69 | 76 | 70 | 72 |
| 71 | 74 | 71 | 76 | 69 | 72 |
| 73 | 75 | 71 | 77 | 69 | 71 |
| 73 | 75 | 72 | 76 | 60 | 71 |
| 74 | 74 | 72 | 75 | 59 | 71 |
| 74 | 74 | 72 | 74 | 58 | 73 |
| 74 | 71 | 72 | 74 | 57 | 74 |
| 74 | 68 | 71 | 74 | 56 | 74 |
| 74 | 66 | 70 | 74 | 60 | 73 |
| 75 | 65 | 70 | 74 | 68 | 69 |
| 75 | 64 | 71 | 74 | 69 | 69 |
| 74 | 64 | 71 | 73 | 69 | 69 |
| 73 | 65 | 72 | 72 | 70 | 70 |
| 72 | 65 | 72 | 71 | 70 | 70 |
| 71 | 65 | 71 | 71 | 72 | 70 |
| 70 | 65 | 71 | 71 | 68 | 68 |

|    |    |    |    |    |    |
|----|----|----|----|----|----|
| 70 | 64 | 70 | 70 | 67 | 68 |
| 69 | 64 | 69 | 70 | 66 | 68 |
| 69 | 63 | 69 | 70 | 66 | 68 |
| 70 | 63 | 70 | 70 | 66 | 69 |
| 71 | 64 |    | 70 | 66 | 70 |
| 72 | 64 |    | 70 | 66 | 70 |
| 72 | 65 |    | 70 | 65 | 70 |
| 71 | 66 |    | 70 | 64 | 68 |
| 70 | 67 |    | 69 | 63 | 68 |
| 70 | 68 |    | 69 | 62 | 68 |
| 70 | 68 |    | 69 | 62 | 68 |
| 70 | 68 |    | 70 | 62 | 69 |
| 70 | 68 |    | 70 | 62 | 70 |
| 69 | 68 |    | 70 | 62 | 70 |
| 69 | 68 |    | 71 | 62 | 71 |
| 69 | 68 |    | 72 | 63 | 71 |
| 69 | 68 |    | 72 | 65 | 71 |
| 69 | 68 |    | 73 | 66 | 71 |
| 68 | 69 |    | 72 | 67 | 69 |
| 68 | 70 |    | 71 | 67 | 69 |
| 68 | 71 |    | 70 | 67 | 69 |
| 68 | 71 |    | 71 | 67 | 69 |
| 68 | 71 |    | 70 | 66 | 68 |
| 67 | 71 |    | 73 | 65 | 70 |
|    | 70 |    | 73 | 65 | 71 |
|    | 69 |    | 73 | 65 | 71 |
|    | 69 |    | 72 | 65 | 72 |
|    | 68 |    | 72 | 65 | 72 |
|    | 67 |    | 72 | 65 | 72 |
|    | 67 |    | 72 | 64 | 72 |
|    | 67 |    | 72 | 64 | 71 |
|    | 67 |    | 69 | 64 | 71 |
|    | 66 |    | 68 | 64 | 71 |
|    | 66 |    | 68 | 64 | 71 |
|    | 65 |    | 67 | 63 | 72 |
|    | 66 |    | 68 | 61 | 75 |
|    | 66 |    | 68 | 61 | 75 |
|    | 66 |    | 68 | 64 | 75 |
|    | 67 |    | 68 | 67 | 75 |
|    | 67 |    | 68 | 68 | 75 |
|    | 67 |    | 70 | 69 | 75 |
|    | 66 |    | 70 | 69 | 75 |
|    | 66 |    | 70 | 69 | 76 |
|    | 67 |    | 71 | 69 | 76 |
|    | 67 |    | 71 | 71 | 76 |
|    | 67 |    | 71 | 71 | 76 |
|    | 68 |    | 72 | 72 | 76 |
|    | 69 |    | 73 | 72 | 76 |
|    | 69 |    | 73 | 73 | 77 |
|    | 68 |    | 74 | 71 | 77 |

|    |     |    |    |
|----|-----|----|----|
| 69 | 75  | 71 | 78 |
| 69 | 76  | 71 | 78 |
| 69 | 76  | 71 | 78 |
| 69 | 76  | 71 | 79 |
| 69 | 77  | 70 | 80 |
| 69 | 79  | 70 | 80 |
| 69 | 79  | 70 | 80 |
| 68 | 80  | 70 | 79 |
| 68 | 81  | 70 | 79 |
| 67 | 84  | 70 | 79 |
| 67 | 85  | 70 | 79 |
| 67 | 85  | 70 | 79 |
| 67 | 86  | 70 | 80 |
| 68 | 87  | 70 | 81 |
| 70 | 88  | 69 | 80 |
| 71 | 88  | 69 | 79 |
| 71 | 89  | 69 | 78 |
| 71 | 90  | 68 | 78 |
| 72 | 90  | 67 | 78 |
| 72 | 91  | 66 | 78 |
| 72 | 92  | 67 | 78 |
| 72 | 93  | 67 | 78 |
| 71 | 94  | 66 | 76 |
| 71 | 95  | 66 | 73 |
| 71 | 96  | 66 | 72 |
| 71 | 97  | 65 | 72 |
| 71 | 97  | 65 | 71 |
| 70 | 98  | 65 | 68 |
| 70 | 98  | 65 | 67 |
| 71 | 98  | 65 | 64 |
| 73 | 98  | 65 | 64 |
| 74 | 98  | 65 | 63 |
| 74 | 99  | 65 | 63 |
| 73 | 99  | 65 | 63 |
| 70 | 99  | 66 | 63 |
| 68 | 99  | 66 | 63 |
| 67 | 99  | 66 | 62 |
| 68 | 99  | 67 | 62 |
| 68 | 100 | 67 | 63 |
| 68 | 100 | 67 | 64 |
| 68 | 101 | 67 | 65 |
| 69 | 102 | 68 | 65 |
| 69 | 102 | 68 |    |
| 69 | 103 | 68 |    |
| 70 | 103 | 68 |    |
| 69 | 103 | 68 |    |
| 68 | 103 | 70 |    |
| 68 | 103 | 70 |    |
| 67 | 102 | 70 |    |
| 67 | 102 | 69 |    |

|    |     |    |
|----|-----|----|
| 66 | 101 | 70 |
| 66 | 101 | 70 |
| 66 | 101 | 71 |
| 65 | 100 | 71 |
| 66 | 101 | 70 |
| 66 | 102 | 70 |
| 65 | 102 | 70 |
| 65 | 102 | 70 |
| 64 | 102 | 70 |
| 64 | 102 | 70 |
| 63 | 100 | 71 |
| 63 | 100 | 71 |
| 63 | 100 | 71 |
| 63 | 100 | 72 |
| 63 | 97  | 74 |
| 63 | 96  | 75 |
| 63 | 96  | 75 |
| 63 | 95  | 75 |
| 63 | 94  | 75 |
| 64 | 92  |    |
| 66 | 90  |    |
| 68 | 88  |    |
| 68 | 88  |    |
| 69 | 88  |    |
| 69 | 85  |    |
| 70 | 84  |    |
| 70 | 83  |    |
| 70 | 80  |    |
| 69 | 79  |    |
| 69 | 79  |    |
| 69 | 79  |    |
| 68 | 80  |    |
| 67 | 80  |    |
| 68 | 80  |    |
| 68 | 81  |    |
| 68 | 83  |    |
| 68 | 83  |    |
| 68 | 83  |    |
| 68 | 83  |    |
| 67 | 84  |    |
| 68 | 84  |    |
| 68 | 83  |    |
| 71 | 80  |    |
| 71 | 79  |    |
| 71 | 78  |    |
| 71 | 78  |    |
| 70 | 77  |    |
| 69 | 77  |    |
| 69 | 77  |    |
| 69 | 75  |    |
| 69 | 71  |    |

|    |    |
|----|----|
| 69 | 69 |
| 69 | 69 |
| 70 | 69 |
| 70 | 69 |
| 70 | 69 |
| 68 | 69 |
| 67 | 68 |
| 66 | 68 |
| 65 | 68 |
| 64 | 67 |
|    | 67 |
|    | 68 |
|    | 68 |
|    | 70 |
|    | 70 |
|    | 70 |
|    | 71 |
|    | 71 |
|    | 70 |
|    | 69 |
|    | 68 |
|    | 67 |
|    | 66 |
|    | 65 |
|    | 64 |
|    | 62 |
|    | 62 |
|    | 61 |
|    | 61 |
|    | 60 |
|    | 60 |
|    | 60 |
|    | 60 |
|    | 60 |
|    | 60 |
|    | 60 |
|    | 60 |
|    | 60 |
|    | 59 |
|    | 59 |
|    | 59 |
|    | 59 |
|    | 59 |
|    | 59 |
|    | 59 |
|    | 59 |
|    | 59 |
|    | 60 |
|    | 62 |
|    | 65 |
|    | 65 |
|    | 65 |

67  
68  
68  
68  
70  
71  
71  
72  
72  
72  
73  
73  
73  
71  
70  
69  
69  
69  
69  
70  
70  
70  
70  
70  
70  
70  
67  
66  
65  
65  
65  
65  
65  
65  
65  
66  
66  
67  
67  
67  
67  
67  
67  
67  
68  
71  
72  
72  
72  
72  
73

74  
74  
74  
75  
74  
69  
68  
68  
68  
68  
68  
68  
68  
68  
68  
68  
68  
68  
71  
71  
71  
71  
71  
72  
72  
72  
72  
73  
74  
75  
76  
76  
77  
77  
78  
79  
80  
80  
79  
79  
79  
79  
79  
79  
78  
76  
75  
75  
73  
72  
72

73  
72  
71  
71  
72  
73  
73  
73  
73  
73  
73  
73  
73  
73  
73  
73  
73  
73  
76  
76  
76  
76  
78  
79  
80  
80  
80  
81  
83  
84  
85  
85  
85  
85  
85  
86  
87  
87  
88  
90  
90  
90  
89  
88  
88  
88  
87



















| usr#10<br>App1 | usr#10<br>App2 | usr#10<br>App3 |    |
|----------------|----------------|----------------|----|
|                | 58             | 57             | 59 |
|                | 58             | 58             | 59 |
|                | 58             | 59             | 59 |
|                | 59             | 59             | 59 |
|                | 59             | 61             | 59 |
|                | 59             | 62             | 59 |
|                | 60             | 63             | 59 |
|                | 60             | 64             | 59 |
|                | 60             | 64             | 58 |
|                | 61             | 65             | 58 |
|                | 60             | 66             | 58 |
|                | 58             | 66             | 58 |
|                | 58             | 65             | 58 |
|                | 58             | 64             | 58 |
|                | 59             | 63             | 59 |
|                | 59             | 62             | 59 |
|                | 60             | 61             | 59 |
|                | 60             | 60             | 59 |
|                | 60             | 60             | 60 |
|                | 60             | 60             | 61 |
|                | 60             | 60             | 61 |
|                | 60             | 61             | 62 |
|                | 60             | 61             | 62 |
|                | 60             | 62             | 62 |
|                | 60             | 62             | 61 |
|                | 59             | 62             | 60 |
|                | 59             | 62             | 60 |
|                | 60             | 62             | 62 |
|                | 60             | 62             | 63 |
|                | 60             | 62             | 63 |
|                | 59             | 62             | 63 |
|                | 59             | 62             | 62 |
|                | 59             | 62             | 63 |
|                | 59             | 62             | 63 |
|                | 58             | 62             | 63 |
|                | 57             | 62             | 63 |
|                | 57             | 61             | 63 |
|                | 56             | 60             | 63 |
|                | 56             | 60             | 65 |
|                | 56             | 60             | 65 |
|                | 55             | 60             | 65 |
|                | 53             | 63             | 64 |
|                | 54             | 64             | 61 |
|                | 60             | 64             | 60 |
|                | 61             | 64             | 60 |
|                | 61             | 63             | 60 |
|                | 61             | 62             | 60 |
|                | 62             | 61             | 60 |

|    |    |    |
|----|----|----|
| 62 | 61 | 60 |
| 62 | 61 | 61 |
| 63 | 61 | 61 |
| 63 | 61 | 61 |
| 63 | 60 | 61 |
| 63 | 60 | 61 |
| 64 | 60 | 61 |
| 65 | 60 | 61 |
| 64 | 60 | 61 |
| 63 | 60 | 62 |
| 62 | 60 | 62 |
| 60 | 61 | 62 |
| 60 | 61 | 62 |
| 60 | 61 | 62 |
| 59 | 61 | 62 |
| 59 | 61 | 62 |
| 59 | 61 | 62 |
| 59 | 61 | 61 |
| 59 | 60 | 61 |
| 59 | 60 | 61 |
| 58 | 60 | 60 |
| 59 | 60 | 61 |
| 58 | 60 | 61 |
| 59 | 60 | 61 |
| 59 | 61 | 61 |
| 59 | 61 | 60 |
| 59 | 61 | 59 |
| 59 | 61 | 59 |
| 59 | 61 | 61 |
| 59 | 61 | 61 |
| 59 | 61 | 61 |
| 60 | 61 | 61 |
| 60 | 61 | 60 |
| 60 | 61 | 60 |
| 60 | 60 | 60 |
| 61 | 59 | 59 |
| 63 | 58 | 59 |
| 64 | 58 | 59 |
| 64 | 57 | 59 |
| 64 | 57 | 59 |
| 65 | 57 | 60 |
| 66 | 57 | 62 |
| 66 | 63 | 68 |
| 66 | 65 | 70 |
| 67 | 66 | 70 |
| 68 | 65 | 67 |
| 69 | 64 | 65 |
| 70 | 63 | 64 |
| 70 | 62 | 64 |
| 70 | 62 | 64 |

|    |    |    |
|----|----|----|
| 70 | 62 | 64 |
| 69 | 62 | 64 |
| 69 | 62 | 65 |
| 70 | 62 | 66 |
| 71 | 61 | 67 |
| 71 | 61 | 67 |
| 71 | 60 | 67 |
| 71 | 60 | 68 |
| 70 | 60 | 68 |
| 69 | 60 | 68 |
| 68 | 60 | 68 |
| 68 | 60 | 68 |
| 68 | 60 | 68 |
| 68 | 60 | 68 |
| 69 | 60 | 67 |
| 70 | 59 | 67 |
| 69 | 59 | 67 |
| 69 | 58 | 66 |
| 69 | 58 | 66 |
| 69 | 58 | 62 |
| 69 | 58 | 60 |
| 69 | 58 | 58 |
| 66 | 58 | 57 |
| 65 | 58 | 57 |
| 64 | 58 | 57 |
| 65 | 58 | 57 |
| 65 | 58 | 58 |
| 65 | 58 | 58 |
| 64 |    | 57 |
| 64 |    | 57 |
| 64 |    | 57 |
| 64 |    | 57 |
| 64 |    | 57 |
| 62 |    | 57 |
| 61 |    | 57 |
| 60 |    | 57 |
| 60 |    | 55 |
| 60 |    | 55 |
| 61 |    | 55 |
| 61 |    | 55 |
| 61 |    | 53 |
| 62 |    | 52 |
| 61 |    | 52 |
| 61 |    | 53 |
| 62 |    | 54 |
| 62 |    | 55 |
| 62 |    | 55 |
| 61 |    | 55 |
| 61 |    | 55 |
| 61 |    | 55 |

|    |    |
|----|----|
| 61 | 55 |
| 61 | 56 |
| 62 | 57 |
| 62 | 57 |
| 62 | 57 |
| 62 | 57 |
| 61 | 59 |
| 62 | 63 |
| 62 | 62 |
| 62 | 62 |
| 62 | 62 |
| 62 | 61 |
| 62 | 62 |
| 60 | 62 |
| 60 | 62 |
| 60 | 62 |
| 60 | 62 |
| 61 | 62 |
| 62 | 63 |
| 62 | 65 |
| 61 | 65 |
| 62 | 65 |
| 62 | 64 |
| 62 | 64 |
| 61 | 64 |
| 62 | 63 |
| 62 | 62 |
| 62 | 60 |
| 60 | 59 |
| 60 | 59 |
| 59 | 59 |
| 58 | 59 |
| 58 | 59 |
| 58 | 58 |
| 57 | 58 |
| 57 | 58 |
| 57 | 58 |
| 58 | 58 |
| 58 | 60 |
| 58 | 60 |
| 57 | 60 |
| 57 | 61 |
| 56 | 61 |
| 55 | 62 |
| 61 | 62 |
| 64 | 62 |
| 65 | 62 |
| 66 | 62 |
| 66 | 62 |
| 66 | 62 |

|    |    |
|----|----|
| 67 | 62 |
| 66 | 62 |
| 65 | 62 |
| 65 | 61 |
| 64 | 61 |
| 64 | 59 |
| 64 | 58 |
| 64 | 58 |
| 64 | 56 |
| 64 | 55 |
| 64 | 55 |
| 64 | 55 |
| 64 | 53 |
| 62 |    |
| 61 |    |
| 60 |    |
| 59 |    |
| 58 |    |
| 58 |    |
| 58 |    |
| 58 |    |
| 62 |    |
| 66 |    |
| 67 |    |
| 66 |    |
| 66 |    |
| 66 |    |
| 66 |    |
| 66 |    |
| 65 |    |
| 64 |    |
| 64 |    |
| 64 |    |
| 64 |    |
| 64 |    |
| 64 |    |
| 64 |    |
| 64 |    |
| 64 |    |
| 65 |    |
| 62 |    |
| 62 |    |
| 61 |    |
| 61 |    |
| 61 |    |
| 60 |    |
| 60 |    |
| 60 |    |
| 59 |    |
| 59 |    |
| 58 |    |

58  
57  
57  
57  
57  
57  
57  
56  
54  
53  
55  
57  
58  
58  
58  
58  
59  
59  
59  
60  
59  
59  
59  
59  
59  
59  
59  
59  
59  
59  
60  
60  
60  
60  
59  
59  
61  
61  
62  
63  
63  
62  
62  
61  
60  
60  
57  
57  
57  
56

55  
54  
53  
54  
55  
54  
54  
54  
54  
54  
56  
57  
58  
59  
59  
59  
58  
58  
58  
58  
58  
58  
58  
58  
59  
59  
59  
58  
57  
57  
58  
59  
60  
61  
61  
62  
62  
62  
62  
62  
61  
60  
59  
59  
59  
59  
59  
58  
59  
60  
60  
60

60  
61  
61  
60  
60  
64  
65  
66  
66  
66  
66  
67  
67  
67  
67  
68  
68  
67  
66  
64  
64  
65  
65  
65  
65  
63  
61  
61  
60  
58  
56  
54  
51  
50  
50  
51  
51  
52  
53  
52  
52  
51  
50  
50  
51  
52  
53  
55  
56  
57

58  
58  
59  
60  
60  
60  
59  
59  
59  
58  
58  
58  
58  
57  
57  
56  
56  
55  
54  
54  
55  
57  
60  
61  
62  
65  
65  
66  
67  
67  
67  
66  
66  
66  
66  
67  
67  
66  
65  
65  
65  
65  
65  
67  
69  
70  
70  
71  
71  
71  
72

72  
73  
73  
72  
70  
70  
69  
65  
61  
59  
59  
59  
59  
58  
58  
58  
58  
59  
62  
63  
64  
64  
64  
64  
64  
64  
65  
65  
65  
65  
65  
64  
64  
64  
64  
65  
66  
67  
67  
66  
66  
67  
67  
67  
67  
66  
66  
65  
65  
65  
64  
63

62  
62  
62  
62  
62  
61  
60  
58  
57  
57  
57  
58  
58  
58  
58  
60  
62  
63  
63  
64  
65  
65  
65  
65  
65  
65  
64  
64  
64  
64  
64  
64  
64  
64  
64  
63  
63  
63  
63  
63  
63  
62  
62  
62  
62  
62  
62  
62  
62  
63  
62  
62

62  
62  
62  
62  
64  
64  
65  
66  
66  
66  
66  
66  
66  
64  
64  
64  
64  
64  
61  
61  
61  
61  
61  
61  
59  
58  
58  
58  
58  
58  
59  
61  
62  
63  
63  
63  
64  
66  
66  
67  
67  
67  
68  
68  
68  
68  
68  
68  
67

65

65
