# Supplementary material for: Examining Potential of Scents for Enhancement of User Performance with Mobile Apps
Source: Hindawi journal article supplement (doi:10.1155/2022/8776994), 2022-03-16
Supplement: f1 [file 8776994.f1.zip › 8776994.f1/raw_dataset_tasks-app1-controlgroup.pdf]

| User   | Task | Time (s) | KLM | Errors |
|--------|------|----------|-----|--------|
| usr#1  | T1   | 0:48     | 10  | 0      |
| usr#1  | T2   | 0:15     | 4   | 0      |
| usr#1  | T3   | 3:49     | 29  | 7      |
| usr#1  | T4   | 1:03     | 6   | 0      |
| usr#1  | T5   | 0:09     | 3   | 0      |
| usr#2  | T1   | 0:32     | 5   | 0      |
| usr#2  | T2   | 0:22     | 4   | 0      |
| usr#2  | T3   | 0:29     | 8   | 0      |
| usr#2  | T4   | 0:36     | 19  | 0      |
| usr#2  | T5   | 0:11     | 2   | 0      |
| usr#3  | T1   | 0:27     | 5   | 0      |
| usr#3  | T2   | 0:15     | 4   | 0      |
| usr#3  | T3   | 3:21     | 51  | 2      |
| usr#3  | T4   | 0:11     | 3   | 1      |
| usr#3  | T5   | 0:09     | 4   | 0      |
| usr#4  | T1   | 1:24     | 30  | 1      |
| usr#4  | T2   | 0:37     | 4   | 0      |
| usr#4  | T3   | 2:32     | 46  | 1      |
| usr#4  | T4   | 1:28     | 26  | 2      |
| usr#4  | T5   | 0:20     | 9   | 0      |
| usr#5  | T1   | 1:05     | 14  | 0      |
| usr#5  | T2   | 0:35     | 4   | 0      |
| usr#5  | T3   | 1:26     | 13  | 0      |
| usr#5  | T4   | 0:12     | 4   | 1      |
| usr#5  | T5   | 1:40     | 18  | 0      |
| usr#6  | T1   | 0:20     | 6   | 0      |
| usr#6  | T2   | 0:13     | 4   | 0      |
| usr#6  | T3   | 0:38     | 9   | 0      |
| usr#6  | T4   | 1:15     | 20  | 1      |
| usr#6  | T5   | 0:11     | 4   | 0      |
| usr#7  | T1   | 0:23     | 9   | 1      |
| usr#7  | T2   | 0:09     | 4   | 0      |
| usr#7  | T3   | 2:15     | 50  | 0      |
| usr#7  | T4   | 0:45     | 23  | 0      |
| usr#7  | T5   | 0:09     | 4   | 0      |
| usr#8  | T1   | 0:18     | 4   | 0      |
| usr#8  | T2   | 0:06     | 4   | 0      |
| usr#8  | T3   | 0:34     | 8   | 0      |
| usr#8  | T4   | 0:11     | 4   | 1      |
| usr#8  | T5   | 0:20     | 6   | 0      |
| usr#9  | T1   | 0:30     | 12  | 0      |
| usr#9  | T2   | 0:19     | 6   | 0      |
| usr#9  | T3   | 2:22     | 52  | 1      |
| usr#9  | T4   | 1:38     | 38  | 2      |
| usr#9  | T5   | 0:09     | 4   | 0      |
| usr#10 | T1   | 0:37     | 11  | 0      |
| usr#10 | T2   | 0:16     | 4   | 0      |
| usr#10 | T3   | 4:51     | 97  | 16     |
| usr#10 | T4   | 0:22     | 9   | 1      |

|        |    |      |   |   |
|--------|----|------|---|---|
| usr#10 | T5 | 0:15 | 4 | 0 |
|--------|----|------|---|---|
