# Supplementary material for: Examining Potential of Scents for Enhancement of User Performance with Mobile Apps
Source: Hindawi journal article supplement (doi:10.1155/2022/8776994), 2022-03-16
Supplement: f1 [file 8776994.f1.zip › 8776994.f1/raw_dataset_tasks-app2-controlgroup.pdf]

| User   | Task | Time (s) | KLM | Errors |
|--------|------|----------|-----|--------|
| usr#1  | T1   | 0:16     | 4   | 0      |
| usr#1  | T2   | 0:26     | 5   | 0      |
| usr#1  | T3   | 0:35     | 3   | 0      |
| usr#1  | T4   | 0:24     | 3   | 0      |
| usr#1  | T5   | 1:16     | 18  | 4      |
| usr#2  | T1   | 0:15     | 4   | 0      |
| usr#2  | T2   | 0:18     | 4   | 0      |
| usr#2  | T3   | 0:24     | 7   | 4      |
| usr#2  | T4   | 0:15     | 3   | 0      |
| usr#2  | T5   | 0:17     | 7   | 0      |
| usr#3  | T1   | 0:33     | 6   | 1      |
| usr#3  | T2   | 0:27     | 6   | 1      |
| usr#3  | T3   | 3:20     | 27  | 1      |
| usr#3  | T4   | 0:10     | 3   | 0      |
| usr#3  | T5   | 0:32     | 7   | 0      |
| usr#4  | T1   | 0:19     | 6   | 0      |
| usr#4  | T2   | 0:47     | 5   | 0      |
| usr#4  | T3   | 0:45     | 12  | 1      |
| usr#4  | T4   | 2:10     | 35  | 1      |
| usr#4  | T5   | 0:35     | 14  | 3      |
| usr#5  | T1   | 0:21     | 4   | 0      |
| usr#5  | T2   | 0:20     | 4   | 0      |
| usr#5  | T3   | 4:02     | 66  | 4      |
| usr#5  | T4   | 1:57     | 34  | 4      |
| usr#5  | T5   | 1:40     | 18  | 2      |
| usr#6  | T1   | 0:09     | 4   | 0      |
| usr#6  | T2   | 0:09     | 4   | 0      |
| usr#6  | T3   | 0:17     | 4   | 1      |
| usr#6  | T4   | 0:11     | 3   | 0      |
| usr#6  | T5   | 0:06     | 4   | 0      |
| usr#7  | T1   | 0:22     | 7   | 0      |
| usr#7  | T2   | 0:17     | 9   | 0      |
| usr#7  | T3   | 0:21     | 4   | 2      |
| usr#7  | T4   | 0:15     | 6   | 1      |
| usr#7  | T5   | 0:38     | 11  | 0      |
| usr#8  | T1   | 0:22     | 4   | 0      |
| usr#8  | T2   | 0:19     | 4   | 0      |
| usr#8  | T3   | 0:48     | 10  | 1      |
| usr#8  | T4   | 0:12     | 4   | 0      |
| usr#8  | T5   | 0:50     | 20  | 3      |
| usr#9  | T1   | 0:10     | 4   | 0      |
| usr#9  | T2   | 0:08     | 4   | 0      |
| usr#9  | T3   | 0:45     | 14  | 1      |
| usr#9  | T4   | 1:15     | 24  | 0      |
| usr#9  | T5   | 0:32     | 12  | 0      |
| usr#10 | T1   | 0:12     | 4   | 0      |
| usr#10 | T2   | 0:17     | 5   | 0      |
| usr#10 | T3   | 0:20     | 5   | 1      |
| usr#10 | T4   | 0:14     | 5   | 0      |

|        |    |      |   |   |
|--------|----|------|---|---|
| usr#10 | T5 | 0:23 | 8 | 0 |
|--------|----|------|---|---|
