# Supplementary material for: Examining Potential of Scents for Enhancement of User Performance with Mobile Apps
Source: Hindawi journal article supplement (doi:10.1155/2022/8776994), 2022-03-16
Supplement: f1 [file 8776994.f1.zip › 8776994.f1/raw_dataset_tasks-app3-controlgroup.pdf]

| User   | Task | Time (s) | KLM | Errors |
|--------|------|----------|-----|--------|
| usr#1  | T1   | 0:18     | 4   | 0      |
| usr#1  | T2   | 0:16     | 5   | 0      |
| usr#1  | T3   | 0:41     | 5   | 0      |
| usr#1  | T4   | 0:23     | 4   | 0      |
| usr#1  | T5   | 0:51     | 11  | 4      |
| usr#2  | T1   | 0:15     | 4   | 0      |
| usr#2  | T2   | 0:27     | 4   | 0      |
| usr#2  | T3   | 0:44     | 9   | 0      |
| usr#2  | T4   | 0:16     | 4   | 0      |
| usr#2  | T5   | 0:16     | 7   | 0      |
| usr#3  | T1   | 0:17     | 4   | 0      |
| usr#3  | T2   | 0:16     | 4   | 0      |
| usr#3  | T3   | 0:44     | 9   | 0      |
| usr#3  | T4   | 0:15     | 4   | 0      |
| usr#3  | T5   | 0:18     | 4   | 0      |
| usr#4  | T1   | 0:43     | 5   | 0      |
| usr#4  | T2   | 0:31     | 5   | 0      |
| usr#4  | T3   | 2:17     | 34  | 0      |
| usr#4  | T4   | 3:27     | 57  | 3      |
| usr#4  | T5   | 0:15     | 4   | 0      |
| usr#5  | T1   | 0:33     | 4   | 0      |
| usr#5  | T2   | 0:21     | 4   | 0      |
| usr#5  | T3   | 1:12     | 8   | 0      |
| usr#5  | T4   | 0:30     | 8   | 0      |
| usr#5  | T5   | 0:33     | 6   | 0      |
| usr#6  | T1   | 0:10     | 4   | 0      |
| usr#6  | T2   | 0:13     | 4   | 0      |
| usr#6  | T3   | 0:16     | 5   | 0      |
| usr#6  | T4   | 0:15     | 4   | 0      |
| usr#6  | T5   | 0:06     | 3   | 0      |
| usr#7  | T1   | 0:14     | 7   | 1      |
| usr#7  | T2   | 0:14     | 5   | 0      |
| usr#7  | T3   | 0:17     | 5   | 0      |
| usr#7  | T4   | 0:10     | 5   | 0      |
| usr#7  | T5   | 0:10     | 3   | 0      |
| usr#8  | T1   | 0:30     | 8   | 0      |
| usr#8  | T2   | 0:10     | 4   | 0      |
| usr#8  | T3   | 0:21     | 5   | 0      |
| usr#8  | T4   | 0:17     | 5   | 0      |
| usr#8  | T5   | 0:07     | 3   | 0      |
| usr#9  | T1   | 0:11     | 4   | 0      |
| usr#9  | T2   | 0:10     | 4   | 0      |
| usr#9  | T3   | 0:30     | 6   | 0      |
| usr#9  | T4   | 1:34     | 33  | 2      |
| usr#9  | T5   | 0:13     | 3   | 0      |
| usr#10 | T1   | 0:41     | 6   | 0      |
| usr#10 | T2   | 0:15     | 4   | 0      |
| usr#10 | T3   | 1:06     | 13  | 2      |
| usr#10 | T4   | 0:14     | 4   | 0      |

|        |    |      |   |   |
|--------|----|------|---|---|
| usr#10 | T5 | 0:12 | 3 | 0 |
|--------|----|------|---|---|
